# Supplementary material for: Natural haplotypes of FLM non-coding sequences fine-tune flowering time in ambient spring temperatures in Arabidopsis
Source: eLife journal article supplement (doi:10.7554/elife.22114), 2017-03-15
Supplement: supp [file elife-22114-supp-v1.zip]

Archive with 21 entries (21 files):
- elife_poa_e22114_Figure_2_Figure_Supplement_1.pdf
- elife_poa_e22114_Figure_8_Figure_Supplement_1.pdf
- elife_poa_e22114_Supplementary_File_7.xlsx
- elife_poa_e22114_Figure_3_Figure_Supplement_6.pdf
- elife_poa_e22114_Figure_4_Figure_Supplement_1.pdf
- elife_poa_e22114_Figure_3_Figure_Supplement_1.pdf
- elife_poa_e22114_Supplementary_File_6.xlsx
- elife_poa_e22114_Figure_3_Figure_Supplement_2.pdf
- elife_poa_e22114_Figure_8_Figure_Supplement_2.pdf
- elife_poa_e22114_Supplementary_File_3.xlsx
- elife_poa_e22114_Supplementary_File_1.xlsx
- elife_poa_e22114_Supplementary_File_2.xlsx
- elife_poa_e22114_Figure_3_Figure_Supplement_7.pdf
- elife_poa_e22114_Figure_7_Figure_Supplement_1.pdf
- elife_poa_e22114_Figure_3_Figure_Supplement_4.pdf
- elife_poa_e22114_Figure_3_Figure_Supplement_5.pdf
- elife_poa_e22114_Figure_5_Figure_Supplement_1.pdf
- elife_poa_e22114_Figure_3_Figure_Supplement_3.pdf
- elife_poa_e22114_Figure_2_Figure_Supplement_2.pdf
- elife_poa_e22114_Supplementary_File_4.xlsx
- elife_poa_e22114_Supplementary_File_5.xlsx
