# Supplementary material for: Natural haplotypes of FLM non-coding sequences fine-tune flowering time in ambient spring temperatures in Arabidopsis
Source: eLife journal article supplement (doi:10.7554/elife.22114), 2017-03-15
Supplement: supp [file elife-22114-supp-v1.zip › elife_poa_e22114_Supplementary_File_1.xlsx]

## Sheet: Table_S1
Supplementary file 1: List of 45 SNPs for haplotype analysis.
				accession_name	Bu-0	Kin-0	Lund	Eds-1	Eds-9	9779	9671	9775	9774	9777	9776	9771	9770	9772	Tny-04	Zdr-1	Gy-0	Alst-1	Baa1-2	Kru-3	5984	9938	Ting-1	9933	9932	9931	9930	9937	Fi-0	9934	T800	Lom1-1	ICE49	Ale-Stenar-64-24	Gr-1	915	TV-22	Lm-2	Ven-1	T960	Sq-8	424	TAAD-01	TAAD-03	TAAD-04
position2_rel_to_ATG	position_alignment	position_Chr1	in_element	part_of_54_accessions	no	no	no	no	no	no	no	no	no	no	no	no	no	no	no	no	no	yes	no	no	no	no	no	no	no	no	no	no	no	no	no	no	no	no	no	no	no	no	yes	no	no	no	no	no	no
-2016	26	28953663	2_kb_upstream		g	a	a	a	a	g	a	a	g	g	g	a	g	a	a	a	g	a	g	a	a	a	a	a	g	g	g	g	g	a	a	a	a	a	g	a	a	a	a	a	a	a	a	a	a
-1997	45	28953682	2_kb_upstream		c	a	a	a	a	c	c	c	c	c	c	a	c	c	a	c	c	c	c	a	c	a	c	a	c	c	c	c	c	c	a	a	c	c	c	a	a	a	c	c	a	c	a	a	a
-1983	59	28953696	2_kb_upstream		a	g	g	g	g	a	a	a	a	a	a	g	a	a	g	a	a	a	a	g	a	g	a	g	a	a	a	a	a	a	g	g	a	a	a	g	g	g	a	a	g	a	g	g	g
-1977	65	28953702	2_kb_upstream		a	g	g	g	g	a	a	a	a	a	a	g	a	a	g	a	a	a	a	g	a	g	a	g	a	a	a	a	a	a	g	g	a	a	a	g	g	g	a	a	g	a	g	g	g
-1935	107	28953744	2_kb_upstream		c	c	t	t	t	c	c	c	c	c	c	t	c	c	t	c	c	c	c	t	c	t	c	t	c	c	c	c	c	c	t	t	c	c	c	t	t	c	c	c	c	c	t	t	t
-1893	149	28953786	2_kb_upstream		t	t	t	t	t	t	t	t	t	t	t	t	t	t	t	t	t	t	t	t	t	t	t	c	t	t	t	t	t	t	t	t	t	t	t	t	t	t	t	t	t	t	t	t	t
-1883	159	28953796	2_kb_upstream		c	c	c	c	c	c	c	c	c	c	c	c	c	c	c	c	c	c	c	c	c	c	c	t	c	c	c	c	c	c	c	c	c	c	c	c	c	c	c	c	c	c	c	c	c
-1747	295	28953932	2_kb_upstream		g	t	t	g	t	g	g	g	g	g	g	g	g	g	t	g	g	g	g	t	g	t	g	g	g	g	g	g	g	g	t	g	g	g	g	g	g	t	g	g	t	g	g	g	g
-1731	311	28953948	2_kb_upstream		a	c	c	c	c	a	c	c	a	a	a	c	a	c	c	c	a	c	a	c	c	c	c	c	a	a	a	a	a	c	c	c	c	c	a	c	c	c	c	c	c	c	c	c	c
-1550	492	28954129	2_kb_upstream		a	g	g	g	g	a	a	a	a	a	a	g	a	a	g	g	a	g	a	g	g	g	a	a	a	a	a	a	a	g	g	g	a	a	a	g	a	g	a	a	g	g	g	g	a
-1367	675	28954312	2_kb_upstream		a	a	a	a	a	a	t	t	a	a	a	a	a	a	a	a	a	a	a	a	a	a	t	a	a	a	a	a	a	a	a	a	a	a	a	a	a	a	t	a	a	a	a	a	a
-1309	733	28954370	2_kb_upstream		g	g	g	g	g	g	c	c	g	g	g	g	g	g	g	g	g	g	g	g	g	g	c	g	g	g	g	g	g	g	g	c	g	c	g	g	g	c	c	c	g	g	g	g	g
-1291	751	28954388	2_kb_upstream		t	t	t	t	t	t	c	c	t	t	t	t	t	t	t	t	t	t	t	t	t	a	c	t	t	t	t	t	t	t	t	c	t	c	t	a	t	t	c	c	t	t	t	t	t
-1242	800	28954437	2_kb_upstream		t	t	t	t	t	t	c	t	t	t	t	t	t	t	t	t	t	t	t	t	t	t	c	t	t	t	t	t	t	t	t	g	t	c	t	t	t	t	c	c	t	t	t	t	t
-1050	992	28954629	2_kb_upstream		t	a	a	a	a	t	a	a	t	t	t	a	t	a	a	a	t	a	t	a	a	a	a	a	t	t	t	t	t	a	a	a	a	a	t	a	a	a	a	a	a	a	a	a	a
-846	1196	28954833	2_kb_upstream		g	g	g	g	g	g	g	g	g	g	g	t	g	g	g	g	g	g	g	g	g	g	g	g	g	g	g	g	g	g	g	g	g	g	g	g	g	g	g	g	g	g	t	g	g
-836	1206	28954843	2_kb_upstream		a	a	a	a	a	a	a	a	a	a	a	a	a	a	a	a	a	g	a	a	a	a	a	a	a	a	a	a	a	g	a	a	a	a	a	a	a	a	a	a	a	g	a	a	a
-656	1386	28955023	2_kb_upstream		g	g	g	g	g	g	g	t	g	g	g	g	g	g	g	g	g	g	g	g	g	g	g	g	g	g	g	g	g	g	g	t	g	g	g	g	g	g	g	g	g	g	g	g	g
-368	1674	28955311	2_kb_upstream		t	c	c	c	c	t	c	c	t	t	t	c	t	c	c	c	t	c	t	c	c	c	c	c	t	t	t	t	t	c	c	c	c	t	t	c	c	c	c	t	c	c	c	c	c
-101	1941	28955578	2_kb_upstream		a	g	g	g	g	a	a	a	a	a	a	g	a	a	g	a	a	a	a	g	a	g	a	a	a	a	a	a	a	a	g	a	g	a	a	g	a	g	a	a	g	a	g	a	a
-100	1942	28955579	2_kb_upstream		a	a	a	a	a	a	a	a	a	a	a	g	a	a	a	a	a	a	a	a	a	a	a	a	a	a	a	a	a	a	a	a	g	a	a	a	a	a	a	a	a	a	a	a	a
-98	1944	28955581	2_kb_upstream		a	t	t	t	t	a	a	a	a	a	a	a	a	a	t	a	a	a	a	t	a	t	a	a	a	a	a	a	a	a	t	a	a	a	a	t	a	t	a	a	t	a	a	a	a
-92	1950	28955587	2_kb_upstream		a	a	a	a	a	a	c	a	a	a	a	a	a	a	a	a	a	a	a	a	a	a	c	a	a	a	a	a	a	a	a	a	a	a	a	a	a	a	c	a	a	a	a	a	a
194	2235	28955872	Intron_1		a	a	a	a	a	a	a	t	a	a	a	t	a	a	a	t	a	a	a	a	t	a	t	a	a	a	a	a	a	a	a	t	a	a	a	a	a	a	t	a	a	a	t	a	a
383	2424	28956061	Intron_1		g	g	g	g	g	g	g	g	g	g	g	g	g	g	g	c	g	c	g	g	g	g	g	g	g	g	g	g	g	c	g	g	g	g	g	g	g	g	g	g	g	c	g	g	g
425	2466	28956103	Intron_1		c	c	c	c	c	c	c	t	c	c	c	c	c	c	c	c	c	c	c	c	t	c	c	t	c	c	c	c	c	c	c	c	c	c	c	c	c	c	c	c	c	c	c	c	c
453	2494	28956131	Intron_1		c	c	c	c	c	c	c	a	c	c	c	c	c	c	c	a	c	c	c	c	a	c	c	c	c	c	c	c	c	c	c	c	c	c	c	c	c	c	c	c	c	c	c	c	c
466	2507	28956144	Intron_1		c	c	c	c	c	c	c	c	c	c	c	c	c	t	c	c	c	t	t	c	c	c	c	c	c	c	c	c	c	t	c	c	c	c	c	c	c	c	c	c	c	t	c	c	c
506	2547	28956184	Intron_1		t	t	t	t	t	t	t	g	t	t	t	t	t	t	t	g	t	t	t	t	g	t	t	t	t	t	t	t	t	t	t	t	t	t	t	t	t	t	t	t	t	t	t	t	t
565	2606	28956243	Intron_1		c	c	c	g	c	c	c	c	c	c	c	c	c	g	c	c	c	g	c	c	c	c	c	c	c	c	c	c	c	g	c	c	c	c	c	c	c	c	c	c	c	g	c	c	c
639	2680	28956317	Intron_1		a	a	a	a	a	a	a	a	a	a	a	a	a	c	a	a	a	c	a	a	a	a	a	a	a	a	a	a	a	c	a	a	a	a	a	a	a	a	a	a	a	c	a	a	a
704	2745	28956382	Intron_1		t	t	t	t	t	t	t	c	t	t	t	t	t	t	t	c	t	t	t	t	c	t	t	t	t	t	t	t	t	t	t	t	t	t	t	t	t	t	t	t	t	t	t	t	t
1088	3129	28956766	Intron_1		g	a	a	a	a	g	a	a	g	g	g	a	g	a	a	a	g	a	g	a	a	a	a	a	g	g	a	g	g	a	a	a	a	g	a	a	a	a	a	g	a	a	a	a	a
1132	3173	28956810	Intron_1		a	a	a	a	a	a	g	a	a	a	a	a	a	a	a	a	a	a	a	a	a	a	g	a	a	a	a	a	a	a	a	a	a	a	a	a	g	a	g	a	a	a	a	a	a
1388	3429	28957066	Intron_1		c	g	g	g	g	c	c	c	c	c	c	g	c	c	g	c	c	c	c	g	c	g	c	c	c	c	c	c	c	c	g	c	c	c	c	g	c	g	c	c	g	c	g	c	c
1566	3607	28957244	Intron_1		c	c	c	c	c	c	c	a	c	c	c	c	c	c	c	a	c	c	c	c	a	c	c	c	c	c	c	c	c	c	c	a	c	c	c	c	c	c	c	c	c	c	c	c	c
1813	3854	28957491	Intron_1		g	c	c	c	c	g	g	g	g	g	g	c	g	g	c	g	g	g	g	c	g	c	g	g	g	g	g	g	g	g	c	g	g	g	g	c	g	c	g	g	c	g	c	g	g
1825	3866	28957503	Intron_1		c	c	c	c	c	c	c	t	c	c	c	c	c	t	c	t	c	t	c	c	t	c	c	c	c	c	c	c	c	t	c	c	c	c	c	c	c	c	c	c	c	t	c	t	t
1917	3958	28957595	Intron_1		g	t	t	t	t	g	t	t	g	g	g	t	g	t	t	t	g	t	g	t	t	t	t	t	g	g	g	g	g	t	t	t	t	g	g	t	t	t	t	g	t	t	t	t	t
1988	4029	28957666	Intron_1		t	t	t	t	t	t	t	a	t	t	t	t	t	t	t	t	t	t	t	t	t	t	t	t	t	t	t	t	t	t	t	t	t	t	t	t	t	t	t	t	t	t	t	t	t
2062	4103	28957740	Intron_1		t	t	t	t	t	t	t	c	t	t	t	t	t	c	t	c	t	c	t	t	c	t	t	t	t	t	t	t	t	c	t	t	t	t	t	t	t	t	t	t	t	c	t	c	c
3951	5992	28959629	Intron_2_to_6		t	t	t	t	t	t	t	a	t	t	t	t	t	t	t	a	t	t	t	t	a	t	t	t	t	t	t	t	t	t	t	t	t	t	t	t	t	t	t	t	t	t	t	t	t
3975	6016	28959653	Intron_2_to_6		a	a	a	a	a	a	a	a	a	a	a	c	a	a	a	a	a	a	a	a	a	a	a	c	a	a	a	a	a	a	a	c	a	a	a	a	a	a	a	a	a	a	a	a	a
3976	6017	28959654	Intron_2_to_6		c	a	a	a	a	c	c	a	c	c	c	c	c	a	a	a	c	a	c	a	a	a	c	a	c	c	c	c	c	a	a	a	a	c	c	a	c	a	c	c	a	a	c	a	a
3977	6018	28959655	Intron_2_to_6		a	a	a	a	a	a	a	a	a	a	a	c	a	a	a	a	a	t	a	a	a	a	a	a	a	a	a	a	a	t	a	a	a	a	a	a	a	a	a	a	a	t	t	a	a
[truncated: 732 more columns]
