# Supplementary material for: Natural haplotypes of FLM non-coding sequences fine-tune flowering time in ambient spring temperatures in Arabidopsis
Source: eLife journal article supplement (doi:10.7554/elife.22114), 2017-03-15
Supplement: supp [file elife-22114-supp-v1.zip › elife_poa_e22114_Supplementary_File_2.xlsx]

## Sheet: Table_S2
Supplementary file 2: Identifier and geographic information of the 54 FLM haplotype set accessions.
	Name_2	Stock	1001_ID	#_H7kb_group	#_H1_group	#_H2-6_group	Latitude	Longitude	Country
Gie-0		CS76493	7147	6	4	6	50.5	8.5	Germany
Ven-1		CS76624	7384	6	4	6	52	5.6	Netherlands
Baa-1		CS76442	7002	6	4	6	51.3	6.1	Netherlands
Wc-1		CS76627	7404	6	4	9	53	10	Germany
ICE33	Jablo-1	CS76372	9986	6	4	6	41.588	25.1988	Bulgaria
ICE36	Dobra-1	CS76369	10018	6	4	6	44.8373	20.1566	Serbia
Litva		CS76543	7236	13	5	1	56	24	Lithuania
Li-2:1		CS76541	7223	13	5	1	50.5	8	Germany
Uod-1		CS76621	6975	13	5	1	47.33	13.33	Austria
Pra-6		CS76416	9948	119	5	1	41.0504	-3.53949	Spain
Benk-1		CS76447	7008	5	5	1	52	5.7	Netherlands
Ca-0		CS76459	7062	5	8	1	50.5	8.5	Germany
Pog-0		CS76576	7306	5	8	1	49	-123	Canada
Nok-3		CS76562	6945	5	8	1	52	4	Netherlands
Ba-1		CS76441	7014	5	5	1	52	-3.5	United Kingdom
Sei-0		CS76599	7333	7	4	1	46.5	11.5	Italy
ICE228	Vezzano-2.2	CS76350	9978	7	4	1	46.6295	10.8161	Italy
ICE173	Bozen-1.2	CS76358	9972	7	4	1	46.513	11.331	Italy
ICE169	Bozen-1.1	CS76357	9971	7	4	2	46.513	11.331	Italy
ICE226	Vezzano-2	CS76349	na	7	4	1	46.6295	10.8161	Italy
ICE79	Voeran-1	CS76352	9979	7	4	1	46.36	11.23	Italy
ICE212	Castelfed-4.1	CS76355	na	7	4	1	46.3378	11.2928	Italy
ICE213	Castelfed-4.2	CS76356	na	210	4	1	46.3378	11.2928	Italy
ICE21	Petro-1	CS76370	10017	137	8	4	44.3386	21.4603	Serbia
Ts-1		CS76615	6970	47	8	4	41.5	3	Spain
Se-0		CS76597	6961	47	8	2	41.5	2.5	Spain
Krot-0		CS76534	7203	34	8	2	50.97	11.02	Germany
Jm-0		CS76520	7177	34	8	1	49.07	16.25	Czech Republic
Mh-0		CS76550	7255	200	1	1	53.5	20.5	Poland
Rd-0		CS76584	8366	1	1	6	50.5	8.5	Germany
Old-1		CS76567	7280	1	1	1	53	8	Germany
Vind-1		CS76625	7387	1	1	1	55	-2.3	United Kingdom
Mz-0		CS76557	6940	1	1	1	50.5	8.5	Germany
Cal-0		CS76460	7061	1	1	1	53.35	-2.75	United Kingdom
An-1		CS76435	6898	1	1	1	51.5	4.5	Belgium
Kil-0		CS78784	5748	1	1	1	56	-4.4	UK
Ema-1		CS76480	7109	1	1	1	51.28	0.45	United Kingdom
Kelsterbach-4		CS76525	8420	1	1	1	50.0667	8.5333	Germany
Com-1		CS76469	7092	1	1	1	49.4	2.8	France
Bsch-0		CS76457	7031	1	1	1	50	8.5	Germany
Wei-0		CS76628	6979	1	1	1	47.416	8.433	Switzerland
Alst-1		CS76432	6989	3	6	5	54.8	-2.4	United Kingdom
ICE120	Valsi-1	CS76425	9969	10	7	4	40.1763	16.4533	Italy
ICE102	Galdo-1	CS76423	9962	10	7	4	40.5711	15.3215	Italy
ICE111	Monte-1	CS76361	9966	10	7	4	40.2803	15.655	Italy
ICE93	Apost-1	CS76368	9982	10	7	4	39.0085	16.4678	Italy
ICE119	Timpo-1	CS76424	9968	10	7	4	39.2729	16.2677	Italy
ICE216	Rovero-1	CS76351	9976	3	6	5	46.2543	11.167	Italy
Jl-3		CS76519	7424	3	6	5	49.2	16.6	Czech Republic
Stw-0		CS76605	7347	3	6	5	52.5	36.5	Russia
Rue3.1-31	Ru3.1-31	CS76406	9997	3	6	5	48.564	9.15947	Germany
Col-0		CS76778	6909	3	6	5	38.3	-92.3	USA
Le-0		CS76540	7218	3	6	5	52.5	4.5	Netherlands
En-D		CS76482	7120	3	6	5	48	37.75	Ukraine
