# Supplementary material for: Natural haplotypes of FLM non-coding sequences fine-tune flowering time in ambient spring temperatures in Arabidopsis
Source: eLife journal article supplement (doi:10.7554/elife.22114), 2017-03-15
Supplement: supp [file elife-22114-supp-v1.zip › elife_poa_e22114_Supplementary_File_3.xlsx]

## Sheet: Table_S3
Supplementary file 3: Expression data of 54 FLM haplotype set accessions.
Name	Stock	FLM-beta_23°C	FLM_beta_15°C	FLM-beta_23°C_SD	FLM_beta_15°C_SD	FLM-delta_23°C	FLM-delta_15°C	FLM-delta_23°C_SD	FLM-delta_15°C_SD	Exon1_23°C	Exon1_15°C	Exon1_23°C_SD	Exon1_15°C_SD	FLM-beta_15°C_vs_23°C	FLM-delta_15°C_vs_23°C	FLM-delta_vs_FLM-beta_23°C	FLM-delta_vs_FLM-beta_15°C
Alst-1	CS76432	0.896686	1.48087	0.167081	0.142141	1.46351	1.30616	0.177526	0.103133	0.719042	1.25065	0.0222744	0.0988813	1.65149	0.892482	1.63214	0.882021
An-1	CS76435	0.94263	1.81829	0.0871933	0.041206	0.901296	0.914976	0.176823	0.00794038	0.706999	1.28169	0.0384046	0.0877227	1.92896	1.01518	0.956151	0.503206
Ba-1	CS76441	1.01651	2.13428	0.0834114	0.169094	1.1346	1.12005	0.197346	0.266234	0.995938	1.71117	0.0960652	0.146265	2.09963	0.987175	1.11618	0.524792
Baa-1	CS76442	0.926964	2.12983	0.0792112	0.413409	0.736871	0.46532	0.114009	0.044805	0.790065	1.71326	0.0842928	0.24207	2.29764	0.631481	0.794929	0.218478
Benk-1	CS76447	0.907493	1.87299	0.0333925	0.286083	0.845068	1.04632	0.182352	0.122149	0.798553	1.29259	0.0828039	0.114811	2.06392	1.23815	0.931212	0.558637
Bsch-0	CS76457	1.08577	2.15074	0.0388176	0.187218	1.27578	1.19595	0.175006	0.0397799	1.00913	1.70002	0.101547	0.12351	1.98085	0.937424	1.17501	0.556064
Ca-0	CS76459	0.868297	1.78075	0.0677601	0.360343	0.949099	1.1462	0.259976	0.148136	0.825334	1.43425	0.0371581	0.249622	2.05085	1.20767	1.09306	0.643661
Cal-0	CS76460	1.05069	1.99816	0.127124	0.133069	1.15065	0.904394	0.139844	0.287921	0.937697	1.38406	0.135495	0.170124	1.90175	0.785988	1.09513	0.452613
Col-0	CS76113	0.946244	1.86347	0.0569267	0.405557	1.08756	0.836302	0.140867	0.0315357	0.961616	1.52385	0.0416278	0.124662	1.96934	0.768971	1.14934	0.448786
Com-1	CS76469	0.923381	1.60107	0.0538153	0.241612	1.15636	1.02193	0.351005	0.2119	0.781103	1.19772	0.0130161	0.15877	1.73392	0.883753	1.25231	0.63828
Ema-1	CS76480	0.94522	1.78959	0.0974797	0.212686	1.28904	0.892211	0.0611444	0.18741	0.71978	1.2018	0.0313492	0.261376	1.89331	0.692154	1.36374	0.498555
En-D	CS76482	1.60245	2.78647	0.123164	0.0995466	1.99097	1.14621	0.0644176	0.208075	1.31433	1.43865	0.153372	0.268988	1.73889	0.575703	1.24246	0.411347
Gie-0	CS76493	1.064	1.7488	0.123074	0.0117273	0.79003	0.400467	0.2221	0.0344345	0.909567	1.20627	0.15278	0.0678858	1.64361	0.506901	0.742512	0.228996
ICE102	CS76423	1.36504	1.46698	0.198664	0.224426	1.57632	0.703193	0.508424	0.159108	1.01234	0.889262	0.100568	0.0612233	1.07468	0.446098	1.15478	0.479347
ICE111	CS76361	1.16877	1.77945	0.210306	0.282705	1.28418	0.860576	0.0753987	0.125603	0.974075	1.33069	0.200342	0.186391	1.5225	0.670137	1.09874	0.483619
ICE119	CS76424	0.787725	1.30046	0.0964098	0.111243	1.43507	1.00233	0.170296	0.0875918	0.717255	0.777547	0.0960306	0.0538443	1.6509	0.698457	1.82179	0.770754
ICE120	CS76425	0.992437	1.09142	0.100112	0.0878211	1.06079	0.656948	0.553228	0.171636	0.71996	0.759077	0.0551792	0.10236	1.09974	0.619299	1.06888	0.60192
ICE169	CS76357	1.28238	2.20225	0.090296	0.0980477	0.3533	0.0949945	0.0342266	0.0332443	0.997533	1.30945	0.109539	0.109769	1.71731	0.268878	0.275502	0.0431352
ICE173	CS76358	1.24626	2.24116	0.259515	0.103002	0.283899	0.117868	0.0685807	0.0104971	0.850463	1.20848	0.112043	0.0670459	1.79831	0.415174	0.227801	0.0525922
ICE21	CS76370	1.81097	2.86989	0.00615074	0.557714	0.698289	0.225641	0.105816	0.0733382	1.3613	1.89499	0.248584	0.176212	1.58472	0.323134	0.385589	0.0786236
ICE212	CS76355	1.07996	1.47985	0.103625	0.147815	0.311131	0.125889	0.0794822	0.0280033	0.686329	0.929672	0.04429	0.042182	1.37028	0.404617	0.288093	0.0850684
ICE213	CS76356	1.13945	1.84993	0.0355758	0.107166	0.297364	0.120992	0.0314071	0.0370602	0.770447	1.1342	0.0630977	0.170679	1.62353	0.406881	0.260973	0.0654036
ICE216	CS76351	0.951363	1.64516	0.171904	0.115839	1.23149	1.08176	0.281312	0.048326	0.705225	1.0364	0.121625	0.0444469	1.72926	0.87841	1.29445	0.657539
ICE226	CS76349	0.259801	0.504235	0.0371908	0.0502986	1.21884	0.523174	0.134483	0.121246	0.47222	0.481815	0.0931116	0.04255	1.94085	0.429238	4.69144	1.03756
ICE228	CS76350	0.35704	1.01158	0.0295491	0.810378	1.29018	0.38942	0.456408	0.0232357	0.648129	0.806678	0.0868727	0.513324	2.83323	0.301833	3.61356	0.384963
ICE33	CS76372	1.50124	1.89646	0.105656	1.06261	0.589838	0.341842	0.0546024	0.228306	1.00869	1.2005	0.110562	0.556564	1.26326	0.579552	0.3929	0.180253
ICE36	CS76369	1.35809	2.07682	0.089223	0.095256	0.613687	0.143947	0.466175	0.0413731	0.938151	1.34545	0.14936	0.131586	1.52922	0.23456	0.451874	0.069311
ICE79	CS76352	1.83155	2.12359	0.270446	0.375045	0.62632	0.162059	0.07443	0.0278664	1.3069	1.04027	0.109806	0.187078	1.15945	0.258748	0.341963	0.0763139
ICE93	CS76368	0.852056	0.924461	0.0189596	0.0354631	0.982601	0.526297	0.468574	0.100464	0.728452	0.626667	0.085769	0.0222148	1.08498	0.535616	1.15321	0.569301
Jl-3	CS76519	1.11699	1.98714	0.148164	0.16397	1.17103	1.03487	0.114786	0.197757	0.915289	1.09291	0.0236894	0.0938557	1.77901	0.883723	1.04838	0.520782
Jm-0	CS76520	1.0385	2.02315	0.0526869	0.0801467	0.949321	0.869871	0.157514	0.0783606	0.745168	1.05261	0.051981	0.0277712	1.94816	0.916308	0.914131	0.429958
Kelsterbach-4	CS76525	1.29341	2.07238	0.202369	0.24298	1.32595	0.861069	0.193279	0.184152	1.04018	1.47831	0.0598268	0.0810729	1.60226	0.6494	1.02516	0.415498
Kil-0	N1271	0.368704	0.695266	0.0357766	0.0508342	0.112773	0.0408737	0.0277824	0.0036938	0.649838	0.807272	0.0760727	0.0796898	1.8857	0.362442	0.305863	0.0587886
Krot-0	CS76534	1.1495	2.31542	0.0833671	0.260442	1.12796	0.685658	0.226151	0.204153	0.837232	1.16349	0.0632237	0.211856	2.01429	0.607876	0.981261	0.296127
Le-0	CS76540	1.00958	1.63056	0.145828	0.288467	0.921622	0.741586	0.201921	0.0716778	0.854453	1.01679	0.0921268	0.093818	1.61508	0.804653	0.912873	0.454804
Li-2:1	CS76541	1.62061	2.43921	0.166297	0.102841	0.368991	0.131798	0.1275	0.0259136	1.12759	1.53538	0.0311348	0.155531	1.50512	0.357185	0.227687	0.0540331
Litva	CS76543	1.88271	2.92157	0.498917	0.347245	0.539871	0.213902	0.13371	0.0199072	1.22933	1.59733	0.242122	0.184747	1.55178	0.396209	0.286751	0.0732148
Mh-0	CS76550	1.25568	2.39135	0.139451	0.387573	1.29434	1.09171	0.283043	0.091287	1.00243	1.61233	0.0624277	0.227985	1.90444	0.843448	1.03079	0.456524
Mz-0	CS76557	1.36435	3.9556	0.154869	1.75443	1.20992	2.16725	0.194446	1.08994	1.19961	2.30735	0.186688	0.920507	2.89926	1.79123	0.886813	0.547895
Nok-3	CS76562	1.36178	2.10549	0.0632668	0.0954614	1.35606	0.917943	0.0873648	0.0650476	0.972003	1.35792	0.0550458	0.153591	1.54613	0.676918	0.995803	0.435976
Old-1	CS76567	1.40431	2.03883	0.35512	0.203657	1.48576	0.912927	0.338493	0.0959943	1.11956	1.55765	0.175946	0.156681	1.45183	0.614453	1.05799	0.447771
Pog-0	CS76576	1.37095	2.08096	0.0995659	0.356583	1.21495	0.9309	0.463822	0.120969	1.02637	1.26988	0.197449	0.159842	1.5179	0.766202	0.886214	0.447342
Pra-6	CS76416	0.197054	0.450012	0.0243415	0.0928658	0.135652	0.0897037	0.0373037	0.010947	0.399877	0.500275	0.118763	0.0315592	2.2837	0.66128	0.6884	0.199337
Rd-0	CS76584	1.47067	1.92416	0.205042	0.117176	1.38617	0.826065	0.187335	0.105242	1.02931	1.30534	0.169456	0.195906	1.30836	0.595932	0.942546	0.429312
Rue3-1-31	CS76406	1.32423	2.16578	0.154171	0.381868	1.40005	1.05266	0.307762	0.184693	1.11418	1.5392	0.0889915	0.158478	1.6355	0.751875	1.05726	0.486043
Se-0	CS76597	0.434828	0.51411	0.0503236	0.0999097	1.14762	0.951209	0.321599	0.228735	0.483979	0.536209	0.0484949	0.0403864	1.18233	0.828855	2.63924	1.8502
Sei-0	CS76599	1.75459	2.09734	0.157849	0.118544	0.236745	0.121316	0.00624909	0.00530146	1.02684	1.03198	0.189732	0.0424679	1.19535	0.512431	0.134929	0.0578427
Stw-0	CS76605	1.68384	2.91423	0.362339	0.489462	2.0713	1.38411	0.471214	0.166768	1.36044	1.46416	0.312508	0.20832	1.7307	0.668233	1.2301	0.474949
Ts-1	CS76615	0.640821	0.733935	0.121095	0.046491	1.37711	0.860325	0.0354275	0.0897803	0.719127	0.746379	0.0616708	0.0798394	1.1453	0.624733	2.14897	1.17221
Uod-1	CS76621	2.29326	2.56386	0.110074	0.250231	0.428978	0.146805	0.154541	0.0157295	1.58675	1.73688	0.179125	0.0865907	1.118	0.342221	0.18706	0.0572595
Ven-1	CS76624	1.81768	2.70621	0.204496	0.304713	1.43947	0.490797	0.0391311	0.0305239	1.32932	1.67857	0.123178	0.0857499	1.48883	0.340957	0.791927	0.18136
Vind-1	CS76625	1.38637	1.8399	0.0332397	0.254095	1.74264	0.739562	0.109994	0.157247	0.978238	1.17705	0.0633098	0.268666	1.32713	0.424392	1.25698	0.401958
Wc-1	CS76627	1.29157	1.13539	0.0636059	0.198123	0.567007	0.180194	0.106484	0.0591901	0.945724	0.834747	0.176472	0.14495	0.879072	0.317798	0.439004	0.158707
Wei-0	CS76628	1.42751	2.54011	0.15308	0.646567	1.2958	1.19179	0.356825	0.245544	1.56167	1.63247	0.127139	0.327623	1.7794	0.919735	0.907739	0.469191
