# Supplementary material for: Natural haplotypes of FLM non-coding sequences fine-tune flowering time in ambient spring temperatures in Arabidopsis
Source: eLife journal article supplement (doi:10.7554/elife.22114), 2017-03-15
Supplement: supp [file elife-22114-supp-v1.zip › elife_poa_e22114_Supplementary_File_4.xlsx]

## Sheet: Table_S4
Supplementary file 4: Input data for association analysis.
phenotype_name	bp_position_1	position_in_alignment	structural_variant_type	nmb_A	nmb_T	nmb_C	nmb_G	nmb_1bp_del	nmb_2bp_del	Alst-1	An-1	Ba-1	Baa-1	Benk-1	Bsch-0	Ca-0	Cal-0	Col-0	Com-1	Ema-1	En-D	Gie-0	ICE102	ICE111	ICE119	ICE120	ICE169	ICE173	ICE21	ICE212	ICE213	ICE216	ICE226	ICE228	ICE33	ICE36	ICE79	ICE93	Jl-3	Jm-0	Kelsterbach-4	Kil-0	Krot-0	Le-0	Li-2:1	Litva	Mh-0	Mz-0	Nok-3
Exon1_23	49	-2153	SNP	32	0	22	0	0	0	A	A	C	C	C	A	C	A	A	A	A	A	C	A	A	A	A	C	C	A	C	C	A	C	C	C	C	C	A	A	A	A	A	A	A	C	C	A	A	C
Exon1_23	85	-2117	SNP	0	53	1	0	0	0	T	T	T	T	T	T	T	T	T	T	T	T	T	T	T	T	T	T	T	T	T	T	T	T	T	T	T	T	T	T	T	T	T	T	T	T	T	T	T	T
Exon1_23	111	-2091	SNP	0	0	53	1	0	0	C	C	C	C	C	C	C	C	C	C	C	C	C	C	C	C	C	C	C	G	C	C	C	C	C	C	C	C	C	C	C	C	C	C	C	C	C	C	C	C
Exon1_23	119	-2083	SNP	0	32	0	22	0	0	T	T	G	G	G	T	G	T	T	T	T	T	G	T	T	T	T	G	G	T	G	G	T	G	G	G	G	G	T	T	T	T	T	T	T	G	G	T	T	G
Exon1_23	183	-2019	SNP	41	0	0	13	0	0	A	G	A	A	A	G	A	G	A	G	G	A	A	A	A	A	A	A	A	A	A	A	A	A	A	A	A	A	A	A	A	G	G	A	A	A	A	G	G	A
Exon1_23	202	-2000	SNP	6	0	48	0	0	0	A	C	C	C	C	C	C	C	C	C	C	C	C	A	A	A	A	C	C	C	C	C	C	C	C	C	C	C	A	C	C	C	C	C	C	C	C	C	C	C
Exon1_23	216	-1986	SNP	48	0	0	6	0	0	G	A	A	A	A	A	A	A	A	A	A	A	A	G	G	G	G	A	A	A	A	A	A	A	A	A	A	A	G	A	A	A	A	A	A	A	A	A	A	A
Exon1_23	222	-1980	SNP	48	0	0	6	0	0	G	A	A	A	A	A	A	A	A	A	A	A	A	G	G	G	G	A	A	A	A	A	A	A	A	A	A	A	G	A	A	A	A	A	A	A	A	A	A	A
Exon1_23	264	-1938	SNP	0	5	49	0	0	0	C	C	C	C	C	C	C	C	C	C	C	C	C	T	T	T	T	C	C	C	C	C	C	C	C	C	C	C	T	C	C	C	C	C	C	C	C	C	C	C
Exon1_23	374	-1828	INDEL_DEL_374_374	0	51	0	0	3	0	T	T	T	T	T	T	T	T	T	T	T	T	T	T	T	T	T	T	T	T	T	T	T	T	T	T	-	T	T	T	T	T	T	T	T	T	T	T	T	T
Exon1_23	417	-1785	SNP	0	0	6	48	0	0	G	G	G	G	G	G	G	G	G	G	G	G	G	G	G	G	G	C	C	G	C	C	G	C	G	G	G	C	G	G	G	G	G	G	G	G	G	G	G	G
Exon1_23	453	-1749	SNP	0	1	0	53	0	0	T	G	G	G	G	G	G	G	G	G	G	G	G	G	G	G	G	G	G	G	G	G	G	G	G	G	G	G	G	G	G	G	G	G	G	G	G	G	G	G
Exon1_23	469	-1733	SNP	13	0	41	0	0	0	C	A	C	C	C	A	C	A	C	A	A	C	C	C	C	C	C	C	C	C	C	C	C	C	C	C	C	C	C	C	C	A	A	C	C	C	C	A	A	C
Exon1_23	547	-1655	SNP	0	0	53	1	0	0	C	C	C	C	C	C	C	C	C	C	C	C	C	C	C	C	C	C	C	C	C	C	C	C	C	C	C	C	C	C	C	C	C	C	G	C	C	C	C	C
Exon1_23	628	-1574	SNP	53	0	0	1	0	0	G	A	A	A	A	A	A	A	A	A	A	A	A	A	A	A	A	A	A	A	A	A	A	A	A	A	A	A	A	A	A	A	A	A	A	A	A	A	A	A
Exon1_23	650	-1552	SNP	41	0	0	13	0	0	G	A	A	A	A	A	A	A	G	A	A	G	A	G	G	G	G	A	A	A	A	A	G	A	A	A	A	A	G	G	A	A	A	A	G	A	A	A	A	A
Exon1_23	662	-1540	SNP	27	26	1	0	0	0	A	A	T	T	T	A	T	A	T	A	A	T	T	T	T	C	T	A	A	A	A	A	T	A	T	T	A	A	T	T	A	A	A	A	T	T	T	A	A	T
Exon1_23	667	-1535	SNP	0	49	0	1	4	0	T	T	T	T	T	T	T	T	T	T	T	T	T	-	G	-	-	T	T	T	T	T	T	T	T	T	T	T	-	T	T	T	T	T	T	T	T	T	T	T
Exon1_23	736	-1466	INDEL_DEL_736_736	49	0	0	0	5	0	A	A	A	A	A	A	A	A	A	A	A	A	A	-	-	-	-	A	A	A	A	A	A	A	A	A	A	A	-	A	A	A	A	A	A	A	A	A	A	A
Exon1_23	755	-1447	SNP	1	0	0	53	0	0	G	G	G	G	G	G	G	G	G	G	G	G	G	G	G	G	A	G	G	G	G	G	G	G	G	G	G	G	G	G	G	G	G	G	G	G	G	G	G	G
Exon1_23	781	-1421	SNP	0	53	1	0	0	0	T	T	T	T	T	T	T	T	T	T	T	T	T	T	T	T	T	T	T	T	T	T	T	T	T	T	T	C	T	T	T	T	T	T	T	T	T	T	T	T
Exon1_23	832	-1370	INDEL_DEL_832_832	40	0	0	0	14	0	A	A	A	-	-	A	-	A	A	A	A	A	-	A	A	A	A	A	A	A	A	A	A	A	A	-	-	A	A	A	A	A	A	A	A	-	-	A	A	-
Exon1_23	833	-1369	SNP	39	15	0	0	0	0	A	A	T	T	T	A	T	A	A	A	A	A	T	A	A	A	A	A	A	A	A	A	A	A	A	T	T	A	A	A	A	A	A	A	A	T	T	A	A	T
Exon1_23	891	-1311	SNP	0	0	15	39	0	0	G	G	C	C	C	G	C	G	G	G	G	G	C	G	G	G	G	G	G	G	G	G	G	G	G	C	C	G	G	G	G	G	G	G	G	C	C	G	G	C
Exon1_23	909	-1293	SNP	0	39	15	0	0	0	T	T	C	C	C	T	C	T	T	T	T	T	C	T	T	T	T	T	T	T	T	T	T	T	T	C	C	T	T	T	T	T	T	T	T	C	C	T	T	C
Exon1_23	958	-1244	SNP	0	39	9	6	0	0	T	T	G	C	G	T	G	T	T	T	T	T	C	T	T	T	T	T	T	T	T	T	T	T	T	C	C	T	T	T	T	T	T	T	T	C	C	T	T	G
Exon1_23	975	-1227	INDEL_DEL_975_976	0	0	0	0	0	1	GA	GA	GA	GA	GA	GA	GA	GA	GA	GA	GA	GA	GA	GA	GA	GA	GA	GA	GA	GA	GA	GA	GA	GA	GA	GA	GA	--	GA	GA	GA	GA	GA	GA	GA	GA	GA	GA	GA	GA
Exon1_23	1007	-1195	INDEL_DEL_1007_1008	0	0	0	0	0	4	T-	T-	TT	TT	--	T-	TT	TT	TT	TT	T-	TT	TT	TT	TT	TT	TT	TT	TT	TT	TT	TT	TT	TT	TT	T-	TT	TT	TT	TT	TT	TT	T-	TT	TT	T-	T-	T-	TT	--
Exon1_23	1008	-1194	INDEL_DEL_1008_1008	0	34	0	0	20	0	-	-	T	T	-	-	T	T	T	T	-	T	T	T	T	T	T	T	T	T	T	T	T	T	T	-	T	T	T	T	T	T	-	T	T	-	-	-	T	-
Exon1_23	1150	-1052	SNP	41	13	0	0	0	0	A	T	A	A	A	T	A	T	A	T	T	A	A	A	A	A	A	A	A	A	A	A	A	A	A	A	A	A	A	A	A	T	T	A	A	A	A	T	T	A
Exon1_23	1191	-1011	SNP	0	0	1	53	0	0	G	G	G	G	G	G	G	G	G	G	G	G	G	G	G	G	G	G	G	G	G	G	G	G	G	C	G	G	G	G	G	G	G	G	G	G	G	G	G	G
Exon1_23	1223	-979	SNP	50	0	0	4	0	0	A	A	A	A	A	A	A	A	A	A	A	A	A	A	A	A	A	A	A	A	A	A	A	A	A	A	A	A	A	A	G	A	A	G	A	A	A	A	A	A
Exon1_23	1228	-974	SNP	53	0	0	1	0	0	A	A	A	A	A	A	A	A	A	A	A	A	A	A	A	A	A	A	A	G	A	A	A	A	A	A	A	A	A	A	A	A	A	A	A	A	A	A	A	A
Exon1_23	1321	-881	SNP	0	2	0	52	0	0	G	G	G	G	G	G	G	G	G	G	G	G	G	G	G	G	G	G	G	G	G	G	G	G	G	G	G	G	G	G	T	G	G	T	G	G	G	G	G	G
Exon1_23	1354	-848	SNP	0	8	0	46	0	0	G	G	G	G	G	G	G	G	G	G	G	G	G	G	G	G	G	T	T	G	T	T	G	T	T	G	G	T	G	G	G	G	G	G	G	G	G	G	G	G
Exon1_23	1364	-838	SNP	47	0	0	7	0	0	A	A	A	A	A	A	A	A	G	A	A	G	A	A	A	A	A	A	A	A	A	A	G	A	A	A	A	A	A	G	A	A	A	A	G	A	A	A	A	A
Exon1_23	1404	-798	SNP	0	6	0	48	0	0	G	G	G	G	G	G	G	G	G	G	G	G	G	G	G	G	G	G	G	G	T	T	G	T	T	G	G	T	G	G	G	G	G	G	G	G	G	G	G	G
Exon1_23	1656	-546	SNP	4	0	0	50	0	0	G	G	G	A	G	G	G	G	G	G	G	G	A	G	G	G	G	G	G	G	G	G	G	G	G	G	G	G	G	G	G	G	G	G	G	G	G	G	G	G
Exon1_23	1734	-468	SNP	0	4	50	0	0	0	C	C	C	C	C	C	C	C	C	C	C	C	C	C	C	C	C	C	C	C	C	C	C	C	C	C	C	C	C	C	T	C	C	T	C	C	C	C	C	C
Exon1_23	1832	-370	SNP	0	13	41	0	0	0	C	T	C	C	C	T	C	T	C	T	T	C	C	C	C	C	C	C	C	C	C	C	C	C	C	C	C	C	C	C	C	T	T	C	C	C	C	T	T	C
Exon1_23	1861	-341	SNP	53	0	0	1	0	0	A	A	A	A	A	A	A	A	A	A	A	A	A	A	G	A	A	A	A	A	A	A	A	A	A	A	A	A	A	A	A	A	A	A	A	A	A	A	A	A
Exon1_23	1986	-216	INDEL_DEL_1986_1986	0	41	0	0	13	0	T	T	T	-	T	T	T	T	T	T	T	T	-	T	T	T	T	-	-	T	-	-	T	-	-	-	T	-	T	T	T	T	T	T	T	T	T	T	T	T
Exon1_23	1994	-208	SNP	53	1	0	0	0	0	A	A	A	A	A	A	A	A	A	A	A	A	A	A	A	A	A	A	A	A	A	A	A	A	A	A	A	A	A	A	A	A	T	A	A	A	A	A	A	A
Exon1_23	2030	-172	INDEL_DEL_2030_2030	1	0	0	0	53	0	A	-	-	-	-	-	-	-	-	-	-	-	-	-	-	-	-	-	-	-	-	-	-	-	-	-	-	-	-	-	-	-	-	-	-	-	-	-	-	-
Exon1_23	2042	-160	SNP	0	6	48	0	0	0	C	C	T	C	T	C	T	C	C	C	C	C	C	C	C	C	C	C	C	C	C	C	C	C	C	C	C	C	C	C	C	C	C	C	C	C	C	C	C	T
Exon1_23	2100	-102	SNP	48	0	0	6	0	0	G	A	A	A	A	A	A	A	A	A	A	A	A	G	G	G	G	A	A	A	A	A	A	A	A	A	A	A	G	A	A	A	A	A	A	A	A	A	A	A
Exon1_23	2103	-99	SNP	48	6	0	0	0	0	T	A	A	A	A	A	A	A	A	A	A	A	A	T	T	T	T	A	A	A	A	A	A	A	A	A	A	A	T	A	A	A	A	A	A	A	A	A	A	A
Exon1_23	2109	-93	SNP	34	0	20	0	0	0	A	A	A	C	A	A	A	A	A	A	A	A	C	A	A	A	A	C	C	C	C	C	A	C	C	C	C	C	A	A	C	A	A	C	A	C	C	A	A	A
Exon1_23	2197	-5	SNP	49	0	5	0	0	0	A	A	A	A	A	A	A	A	A	A	A	A	A	A	A	A	A	A	A	C	A	A	A	A	A	A	C	A	A	A	A	A	A	A	A	C	C	A	A	A
Exon1_23	2373	171	SNP	0	1	53	0	0	0	C	C	C	C	C	C	C	C	C	C	C	C	C	C	C	C	C	C	C	C	C	C	C	C	C	C	C	C	C	C	C	C	C	C	C	C	C	C	C	C
Exon1_23	2386	184	SNP	0	1	0	53	0	0	G	G	G	G	G	G	G	G	G	G	G	G	G	G	G	G	G	G	G	G	G	G	G	G	G	G	G	G	G	G	G	G	G	G	G	G	G	G	G	G
Exon1_23	2394	192	SNP	34	20	0	0	0	0	A	A	T	T	T	A	T	A	A	A	A	A	T	A	A	A	A	T	T	A	T	T	A	T	T	T	T	T	A	A	A	A	A	A	A	A	A	A	A	T
Exon1_23	2488	286	SNP	0	8	0	46	0	0	G	G	G	G	G	G	G	G	G	G	G	G	G	G	G	G	G	T	T	G	T	T	G	T	T	G	G	T	G	G	G	G	G	G	G	G	G	G	G	G
Exon1_23	2535	333	SNP	52	0	0	2	0	0	A	A	A	A	A	A	A	A	A	A	A	A	A	A	A	A	A	A	A	A	A	A	A	G	A	A	A	G	A	A	A	A	A	A	A	A	A	A	A	A
Exon1_23	2554	352	SNP	0	53	0	1	0	0	T	T	T	T	T	T	T	T	T	T	T	T	T	T	T	T	T	T	T	G	T	T	T	T	T	T	T	T	T	T	T	T	T	T	T	T	T	T	T	T
Exon1_23	2583	381	SNP	0	0	7	47	0	0	G	G	G	G	G	G	G	G	C	G	G	C	G	G	G	G	G	G	G	G	G	G	C	G	G	G	G	G	G	C	G	G	G	G	C	G	G	G	G	G
Exon1_23	2614	412	SNP	11	1	0	42	0	0	G	A	G	G	G	A	G	A	G	A	A	G	G	G	G	G	G	G	G	G	G	G	G	G	G	G	G	G	G	G	G	A	A	G	G	G	G	A	A	G
Exon1_23	2623	421	SNP	0	52	1	0	1	0	T	T	T	T	T	T	T	T	T	T	T	T	T	T	T	T	T	C	T	T	T	T	T	T	-	T	T	T	T	T	T	T	T	T	T	T	T	T	T	T
Exon1_23	2624	422	SNP	0	39	0	1	14	0	T	-	T	T	T	-	T	-	T	-	-	T	T	T	T	T	T	G	T	T	T	T	T	T	-	T	T	T	T	T	T	-	-	T	T	T	T	-	-	T
Exon1_23	2624	422	INDEL_DEL_2624_2624	0	39	0	1	14	0	T	-	T	T	T	-	T	-	T	-	-	T	T	T	T	T	T	G	T	T	T	T	T	T	-	T	T	T	T	T	T	-	-	T	T	T	T	-	-	T
Exon1_23	2625	423	SNP	0	1	52	0	1	0	C	C	C	C	C	C	C	C	C	C	C	C	C	C	C	C	C	T	C	C	C	C	C	C	-	C	C	C	C	C	C	C	C	C	C	C	C	C	C	C
Exon1_23	2628	426	SNP	0	2	0	51	1	0	G	G	G	G	G	G	G	G	G	G	G	G	G	G	G	G	G	T	T	G	G	G	G	G	-	G	G	G	G	G	G	G	G	G	G	G	G	G	G	G
Exon1_23	2639	437	INDEL_DEL_2639_2640	0	0	0	0	0	4	TT	T-	TT	TT	TT	T-	T-	T-	TT	TT	T-	TT	TT	TT	TT	TT	TT	--	--	TT	TT	TT	TT	TT	--	TT	TT	TT	TT	TT	TT	TT	T-	TT	TT	TT	TT	T-	TT	TT
Exon1_23	2640	438	INDEL_DEL_2640_2641	0	0	0	0	0	10	TT	--	TT	TT	TT	--	--	--	TT	TT	--	TT	TT	T-	TT	TT	TT	--	--	TT	T-	T-	TT	TT	--	TT	TT	TT	TT	TT	TT	TT	--	TT	TT	TT	TT	--	TT	TT
Exon1_23	2641	439	INDEL_DEL_2641_2641	0	41	0	0	13	0	T	-	T	T	T	-	-	-	T	T	-	T	T	-	T	T	T	-	-	T	-	-	T	T	-	T	T	T	T	T	T	T	-	T	T	T	T	-	T	T
Exon1_23	2666	464	SNP	0	12	42	0	0	0	C	C	C	C	C	C	C	C	T	C	C	T	C	T	T	T	T	C	C	C	C	C	T	C	C	C	C	C	T	T	C	C	C	C	T	C	C	C	C	C
Exon1_23	2765	563	SNP	0	0	42	12	0	0	C	C	C	C	C	C	C	C	G	C	C	G	C	G	G	G	G	C	C	C	C	C	G	C	C	C	C	C	G	G	C	C	C	C	G	C	C	C	C	C
Exon1_23	2839	637	SNP	42	0	12	0	0	0	A	A	A	A	A	A	A	A	C	A	A	C	A	C	C	C	C	A	A	A	A	A	C	A	A	A	A	A	C	C	A	A	A	A	C	A	A	A	A	A
Exon1_23	3079	877	SNP	52	2	0	0	0	0	A	A	A	A	A	A	A	A	A	A	A	A	A	A	A	A	A	A	A	A	A	A	A	A	A	A	A	A	A	A	A	A	A	A	A	A	A	T	A	A
Exon1_23	3097	895	SNP	0	8	46	0	0	0	C	C	C	C	C	C	C	C	C	C	C	C	C	C	C	C	C	T	T	C	T	T	C	T	T	C	C	T	C	C	C	C	C	C	C	C	C	C	C	C
Exon1_23	3145	943	SNP	0	1	53	0	0	0	C	C	C	C	C	C	C	C	C	C	C	C	C	C	C	C	C	C	C	C	C	C	C	C	C	C	C	C	C	C	C	C	C	C	C	C	C	C	C	C
Exon1_23	3288	1086	SNP	41	0	0	13	0	0	A	G	A	A	A	G	A	G	A	G	G	A	A	A	A	A	A	A	A	A	A	A	A	A	A	A	A	A	A	A	A	G	G	A	A	A	A	G	G	A
Exon1_23	3332	1130	SNP	40	0	0	14	0	0	A	A	A	G	A	A	A	A	A	A	A	A	G	A	A	A	A	A	A	G	A	A	A	A	A	G	G	A	A	A	G	A	A	G	A	G	G	A	A	A
Exon1_23	3503	1301	INDEL_DEL_3503_3503	0	0	3	0	51	0	-	-	-	C	-	-	-	-	-	-	-	-	C	-	-	-	-	-	-	-	-	-	-	-	-	-	-	-	-	-	-	-	-	-	-	-	-	-	-	-
Exon1_23	3505	1303	INDEL_DEL_3505_3505	0	50	0	0	4	0	T	T	T	T	T	T	T	T	T	T	T	T	T	-	-	T	-	T	T	T	T	T	T	T	T	T	T	T	-	T	T	T	T	T	T	T	T	T	T	T
Exon1_23	3589	1387	SNP	0	0	53	1	0	0	G	C	C	C	C	C	C	C	C	C	C	C	C	C	C	C	C	C	C	C	C	C	C	C	C	C	C	C	C	C	C	C	C	C	C	C	C	C	C	C
Exon1_23	3663	1461	INDEL_DEL_3663_3664	0	0	0	0	0	42	--	--	--	--	--	--	--	--	AA	--	--	AA	--	AA	AA	AA	AA	--	--	--	--	--	AA	--	--	--	--	--	AA	AA	--	--	--	--	AA	--	--	--	--	--
Exon1_23	3772	1570	SNP	1	0	53	0	0	0	C	C	C	C	C	C	C	C	C	C	C	C	C	A	C	C	C	C	C	C	C	C	C	C	C	C	C	C	C	C	C	C	C	C	C	C	C	C	C	C
Exon1_23	3901	1699	INDEL_DEL_3901_3901	7	0	0	0	47	0	-	-	-	-	-	-	-	-	A	-	-	A	-	-	-	-	-	-	-	-	-	-	A	-	-	-	-	-	-	A	-	-	-	-	A	-	-	-	-	-
Exon1_23	3975	1773	SNP	48	0	6	0	0	0	A	A	C	A	C	A	C	A	A	A	A	A	A	A	A	A	A	A	A	A	A	A	A	A	A	A	A	A	A	A	A	A	A	A	A	A	A	A	A	C
Exon1_23	4014	1812	SNP	0	0	1	53	0	0	C	G	G	G	G	G	G	G	G	G	G	G	G	G	G	G	G	G	G	G	G	G	G	G	G	G	G	G	G	G	G	G	G	G	G	G	G	G	G	G
Exon1_23	4026	1824	SNP	0	12	42	0	0	0	C	C	C	C	C	C	C	C	T	C	C	T	C	T	T	T	T	C	C	C	C	C	T	C	C	C	C	C	T	T	C	C	C	C	T	C	C	C	C	C
Exon1_23	4110	1908	SNP	1	0	0	53	0	0	G	G	G	G	G	G	G	G	G	G	G	G	G	G	G	G	G	G	G	G	G	G	G	G	G	A	G	G	G	G	G	G	G	G	G	G	G	G	G	G
Exon1_23	4118	1916	SNP	0	41	0	13	0	0	T	G	T	T	T	G	T	G	T	G	G	T	T	T	T	T	T	T	T	T	T	T	T	T	T	T	T	T	T	T	T	G	G	T	T	T	T	G	G	T
Exon1_23	4263	2061	SNP	0	42	12	0	0	0	T	T	T	T	T	T	T	T	C	T	T	C	T	C	C	C	C	T	T	T	T	T	C	T	T	T	T	T	C	C	T	T	T	T	C	T	T	T	T	T
Exon1_23	4324	2122	SNP	0	0	3	51	0	0	G	G	G	C	G	G	G	G	G	G	G	G	C	G	G	G	G	G	G	G	G	G	G	G	G	G	G	G	G	G	G	G	G	G	G	G	G	G	G	G
Exon1_23	4360	2158	SNP	0	0	6	47	1	0	G	G	G	G	G	G	G	G	G	G	G	G	G	G	G	G	G	C	C	G	C	C	G	C	-	G	G	C	G	G	G	G	G	G	G	G	G	G	G	G
Exon1_23	4550	2348	INDEL_DEL_4550_4551	0	0	0	0	0	50	--	--	--	TT	--	--	--	--	--	--	--	--	TT	--	--	--	--	--	--	--	--	--	--	--	--	--	--	--	--	--	--	--	--	--	--	--	TT	--	--	--
Exon1_23	4682	2480	INDEL_DEL_4682_4682	0	0	52	0	2	0	C	C	C	C	C	C	C	C	C	C	C	C	C	C	C	C	C	C	C	C	C	C	C	C	-	C	-	C	C	C	C	C	C	C	C	C	C	C	C	C
Exon1_23	4962	2760	SNP	1	0	0	53	0	0	G	G	G	G	G	G	G	G	G	G	G	G	G	G	G	G	G	G	G	G	G	G	G	G	A	G	G	G	G	G	G	G	G	G	G	G	G	G	G	G
Exon1_23	4988	2786	SNP	0	4	0	43	7	0	G	G	G	-	G	G	G	G	G	G	G	G	-	G	G	G	G	G	G	T	T	G	G	-	G	G	G	T	G	G	G	G	G	G	G	-	-	G	G	G
Exon1_23	5049	2847	SNP	51	3	0	0	0	0	A	A	A	T	A	A	A	A	A	A	A	A	T	A	A	A	A	A	A	A	A	A	A	A	A	A	A	A	A	A	A	A	A	A	A	A	A	A	A	A
Exon1_23	5142	2940	SNP	53	1	0	0	0	0	A	A	A	A	A	A	A	A	A	A	A	A	A	A	A	A	A	A	A	A	A	A	A	A	A	A	A	A	A	A	A	A	A	A	A	T	A	A	A	A
Exon1_23	5237	3035	INDEL_DEL_5237_5237	1	0	0	0	53	0	-	-	-	-	-	-	-	-	-	-	-	-	-	-	-	-	-	-	-	-	-	-	-	-	-	-	-	-	-	-	-	-	-	-	A	-	-	-	-	-
Exon1_23	5245	3043	SNP	0	53	1	0	0	0	T	T	T	T	T	T	T	T	T	T	T	T	T	T	T	T	T	T	T	T	T	T	T	T	T	T	T	T	T	T	T	T	T	T	T	T	T	T	T	T
Exon1_23	5248	3046	INDEL_DEL_5248_5249	0	0	0	0	0	48	--	--	T-	--	T-	--	TT	--	--	--	--	--	--	--	--	--	--	--	--	--	--	--	--	--	--	--	--	--	--	--	--	--	--	--	--	--	--	T-	--	T-
Exon1_23	5249	3047	INDEL_DEL_5249_5249	0	1	0	0	53	0	-	-	-	-	-	-	T	-	-	-	-	-	-	-	-	-	-	-	-	-	-	-	-	-	-	-	-	-	-	-	-	-	-	-	-	-	-	-	-	-
Exon1_23	5496	3294	SNP	5	0	0	49	0	0	G	G	G	G	G	G	G	G	G	G	G	G	G	A	A	A	A	G	G	G	G	G	G	G	G	G	G	G	A	G	G	G	G	G	G	G	G	G	G	G
Exon1_23	5517	3315	SNP	0	0	1	53	0	0	G	G	G	G	G	G	G	G	G	G	G	G	G	G	G	G	G	G	G	G	G	G	G	G	G	G	G	G	G	G	G	G	G	G	G	G	G	G	G	G
Exon1_23	5573	3371	SNP	1	51	0	0	2	0	T	T	T	T	T	T	T	T	T	T	T	T	T	T	T	T	T	T	T	T	A	T	T	-	T	T	T	T	T	T	T	T	T	T	T	T	T	T	T	T
Exon1_23	5614	3412	SNP	1	49	0	0	4	0	T	T	T	T	T	T	T	T	T	T	A	T	T	T	T	T	T	T	T	-	T	T	T	T	T	-	-	T	T	T	T	T	T	T	T	T	T	T	T	T
Exon1_23	5633	3431	INDEL_DEL_5633_5634	0	0	0	0	0	53	--	--	--	--	--	--	--	--	--	--	--	--	--	--	--	--	--	--	--	--	--	--	--	--	--	--	--	--	--	--	--	--	--	--	AT	--	--	--	--	--
Exon1_23	5980	3778	INDEL_DEL_5980_5980	0	2	0	0	52	0	-	-	-	-	-	-	-	-	-	-	-	-	-	-	-	-	-	-	-	-	-	-	-	-	-	-	-	-	-	-	-	-	-	-	-	-	-	-	-	-
Exon1_23	6126	3924	SNP	0	49	5	0	0	0	T	T	T	T	T	T	T	T	T	T	T	T	T	C	C	C	C	T	T	T	T	T	T	T	T	T	T	T	C	T	T	T	T	T	T	T	T	T	T	T
Exon1_23	6166	3964	SNP	7	47	0	0	0	0	T	T	A	T	A	T	A	T	T	T	T	T	T	T	T	T	T	T	T	T	T	T	T	T	T	T	T	T	T	T	T	T	T	T	T	T	T	A	T	A
Exon1_23	6184	3982	SNP	40	0	14	0	0	0	A	A	C	A	C	A	C	A	A	A	A	A	A	C	C	C	C	A	A	A	A	A	A	A	A	A	A	A	C	A	A	A	A	A	A	A	A	C	A	C
Exon1_23	6185	3983	SNP	25	0	29	0	0	0	A	C	A	C	A	C	A	C	A	C	C	A	C	A	A	A	A	C	C	C	C	A	A	C	C	C	C	C	A	A	A	C	C	A	A	C	C	A	C	A
Exon1_23	6186	3984	SNP	40	8	6	0	0	0	A	A	C	A	C	A	C	A	T	A	A	T	A	A	A	A	A	A	A	A	A	A	T	A	A	A	A	A	A	T	A	A	A	A	T	A	A	C	A	C
Exon1_23	6352	4150	SNP	5	0	0	49	0	0	G	G	G	G	G	G	G	G	G	G	G	G	G	A	A	A	A	G	G	G	G	G	G	G	G	G	G	G	A	G	G	G	G	G	G	G	G	G	G	G
Exon1_23	6374	4172	INDEL_DEL_6374_6374	0	52	0	0	2	0	T	T	T	T	T	T	T	T	T	T	T	T	T	T	T	T	-	T	T	T	T	T	T	T	T	T	T	T	-	T	T	T	T	T	T	T	T	T	T	T
Exon1_23	6455	4253	SNP	52	0	0	2	0	0	A	A	A	A	A	A	A	A	A	A	A	A	A	A	A	A	A	A	A	A	G	G	A	A	A	A	A	A	A	A	A	A	A	A	A	A	A	A	A	A
Exon1_23	6571	4369	INDEL_DEL_6571_6571	0	53	0	0	1	0	T	T	T	T	T	T	T	T	T	T	T	T	T	T	T	T	T	T	T	T	T	T	T	T	T	-	T	T	T	T	T	T	T	T	T	T	T	T	T	T
Exon1_23	6656	4454	INDEL_DEL_6656_6656	0	53	0	0	1	0	T	T	T	T	T	T	T	T	T	T	T	T	T	T	T	T	T	T	-	T	T	T	T	T	T	T	T	T	T	T	T	T	T	T	T	T	T	T	T	T
Exon1_23	6658	4456	SNP	0	53	1	0	0	0	T	T	T	T	T	T	T	T	T	T	C	T	T	T	T	T	T	T	T	T	T	T	T	T	T	T	T	T	T	T	T	T	T	T	T	T	T	T	T	T
Exon1_23	6667	4465	SNP	1	53	0	0	0	0	T	T	T	T	T	T	T	T	T	T	T	T	T	T	T	T	T	T	T	T	T	T	T	T	T	T	T	T	T	T	T	T	T	A	T	T	T	T	T	T
Exon1_23	6668	4466	INDEL_DEL_6668_6668	0	53	0	0	1	0	T	T	T	T	T	T	T	T	T	T	T	T	T	T	T	T	T	T	T	T	T	T	T	T	T	T	T	T	T	T	T	-	T	T	T	T	T	T	T	T
Exon1_23	6681	4479	INDEL_DEL_6681_6681	0	38	0	0	16	0	T	T	-	-	T	T	T	T	T	T	-	T	-	T	T	T	T	T	-	T	T	-	T	T	T	T	T	-	T	T	T	T	-	T	T	T	-	T	-	T
Exon1_23	6826	4624	INDEL_DEL_6826_6827	0	0	0	0	0	1	AT	AT	AT	AT	AT	AT	AT	AT	AT	AT	AT	AT	AT	AT	AT	AT	AT	--	AT	AT	AT	AT	AT	AT	AT	AT	AT	AT	AT	AT	AT	AT	AT	AT	AT	AT	AT	AT	AT	AT
Exon1_23	6830	4628	SNP	5	0	0	49	0	0	G	G	G	G	G	G	G	G	G	G	G	G	G	A	A	A	A	G	G	G	G	G	G	G	G	G	G	G	A	G	G	G	G	G	G	G	G	G	G	G
Exon1_15	49	-2153	SNP							A	A	C	C	C	A	C	A	A	A	A	A	C	A	A	A	A	C	C	A	C	C	A	C	C	C	C	C	A	A	A	A	A	A	A	C	C	A	A	C
Exon1_15	85	-2117	SNP							T	T	T	T	T	T	T	T	T	T	T	T	T	T	T	T	T	T	T	T	T	T	T	T	T	T	T	T	T	T	T	T	T	T	T	T	T	T	T	T
Exon1_15	111	-2091	SNP							C	C	C	C	C	C	C	C	C	C	C	C	C	C	C	C	C	C	C	G	C	C	C	C	C	C	C	C	C	C	C	C	C	C	C	C	C	C	C	C
Exon1_15	119	-2083	SNP							T	T	G	G	G	T	G	T	T	T	T	T	G	T	T	T	T	G	G	T	G	G	T	G	G	G	G	G	T	T	T	T	T	T	T	G	G	T	T	G
Exon1_15	183	-2019	SNP							A	G	A	A	A	G	A	G	A	G	G	A	A	A	A	A	A	A	A	A	A	A	A	A	A	A	A	A	A	A	A	G	G	A	A	A	A	G	G	A
Exon1_15	202	-2000	SNP							A	C	C	C	C	C	C	C	C	C	C	C	C	A	A	A	A	C	C	C	C	C	C	C	C	C	C	C	A	C	C	C	C	C	C	C	C	C	C	C
Exon1_15	216	-1986	SNP							G	A	A	A	A	A	A	A	A	A	A	A	A	G	G	G	G	A	A	A	A	A	A	A	A	A	A	A	G	A	A	A	A	A	A	A	A	A	A	A
Exon1_15	222	-1980	SNP							G	A	A	A	A	A	A	A	A	A	A	A	A	G	G	G	G	A	A	A	A	A	A	A	A	A	A	A	G	A	A	A	A	A	A	A	A	A	A	A
Exon1_15	264	-1938	SNP							C	C	C	C	C	C	C	C	C	C	C	C	C	T	T	T	T	C	C	C	C	C	C	C	C	C	C	C	T	C	C	C	C	C	C	C	C	C	C	C
Exon1_15	374	-1828	INDEL_DEL_374_374							T	T	T	T	T	T	T	T	T	T	T	T	T	T	T	T	T	T	T	T	T	T	T	T	T	T	-	T	T	T	T	T	T	T	T	T	T	T	T	T
Exon1_15	417	-1785	SNP							G	G	G	G	G	G	G	G	G	G	G	G	G	G	G	G	G	C	C	G	C	C	G	C	G	G	G	C	G	G	G	G	G	G	G	G	G	G	G	G
Exon1_15	453	-1749	SNP							T	G	G	G	G	G	G	G	G	G	G	G	G	G	G	G	G	G	G	G	G	G	G	G	G	G	G	G	G	G	G	G	G	G	G	G	G	G	G	G
Exon1_15	469	-1733	SNP							C	A	C	C	C	A	C	A	C	A	A	C	C	C	C	C	C	C	C	C	C	C	C	C	C	C	C	C	C	C	C	A	A	C	C	C	C	A	A	C
Exon1_15	547	-1655	SNP							C	C	C	C	C	C	C	C	C	C	C	C	C	C	C	C	C	C	C	C	C	C	C	C	C	C	C	C	C	C	C	C	C	C	G	C	C	C	C	C
Exon1_15	628	-1574	SNP							G	A	A	A	A	A	A	A	A	A	A	A	A	A	A	A	A	A	A	A	A	A	A	A	A	A	A	A	A	A	A	A	A	A	A	A	A	A	A	A
Exon1_15	650	-1552	SNP							G	A	A	A	A	A	A	A	G	A	A	G	A	G	G	G	G	A	A	A	A	A	G	A	A	A	A	A	G	G	A	A	A	A	G	A	A	A	A	A
Exon1_15	662	-1540	SNP							A	A	T	T	T	A	T	A	T	A	A	T	T	T	T	C	T	A	A	A	A	A	T	A	T	T	A	A	T	T	A	A	A	A	T	T	T	A	A	T
Exon1_15	667	-1535	SNP							T	T	T	T	T	T	T	T	T	T	T	T	T	-	G	-	-	T	T	T	T	T	T	T	T	T	T	T	-	T	T	T	T	T	T	T	T	T	T	T
Exon1_15	736	-1466	INDEL_DEL_736_736							A	A	A	A	A	A	A	A	A	A	A	A	A	-	-	-	-	A	A	A	A	A	A	A	A	A	A	A	-	A	A	A	A	A	A	A	A	A	A	A
Exon1_15	755	-1447	SNP							G	G	G	G	G	G	G	G	G	G	G	G	G	G	G	G	A	G	G	G	G	G	G	G	G	G	G	G	G	G	G	G	G	G	G	G	G	G	G	G
Exon1_15	781	-1421	SNP							T	T	T	T	T	T	T	T	T	T	T	T	T	T	T	T	T	T	T	T	T	T	T	T	T	T	T	C	T	T	T	T	T	T	T	T	T	T	T	T
Exon1_15	832	-1370	INDEL_DEL_832_832							A	A	A	-	-	A	-	A	A	A	A	A	-	A	A	A	A	A	A	A	A	A	A	A	A	-	-	A	A	A	A	A	A	A	A	-	-	A	A	-
Exon1_15	833	-1369	SNP							A	A	T	T	T	A	T	A	A	A	A	A	T	A	A	A	A	A	A	A	A	A	A	A	A	T	T	A	A	A	A	A	A	A	A	T	T	A	A	T
Exon1_15	891	-1311	SNP							G	G	C	C	C	G	C	G	G	G	G	G	C	G	G	G	G	G	G	G	G	G	G	G	G	C	C	G	G	G	G	G	G	G	G	C	C	G	G	C
Exon1_15	909	-1293	SNP							T	T	C	C	C	T	C	T	T	T	T	T	C	T	T	T	T	T	T	T	T	T	T	T	T	C	C	T	T	T	T	T	T	T	T	C	C	T	T	C
Exon1_15	958	-1244	SNP							T	T	G	C	G	T	G	T	T	T	T	T	C	T	T	T	T	T	T	T	T	T	T	T	T	C	C	T	T	T	T	T	T	T	T	C	C	T	T	G
Exon1_15	975	-1227	INDEL_DEL_975_976							GA	GA	GA	GA	GA	GA	GA	GA	GA	GA	GA	GA	GA	GA	GA	GA	GA	GA	GA	GA	GA	GA	GA	GA	GA	GA	GA	--	GA	GA	GA	GA	GA	GA	GA	GA	GA	GA	GA	GA
Exon1_15	1007	-1195	INDEL_DEL_1007_1008							T-	T-	TT	TT	--	T-	TT	TT	TT	TT	T-	TT	TT	TT	TT	TT	TT	TT	TT	TT	TT	TT	TT	TT	TT	T-	TT	TT	TT	TT	TT	TT	T-	TT	TT	T-	T-	T-	TT	--
Exon1_15	1008	-1194	INDEL_DEL_1008_1008							-	-	T	T	-	-	T	T	T	T	-	T	T	T	T	T	T	T	T	T	T	T	T	T	T	-	T	T	T	T	T	T	-	T	T	-	-	-	T	-
Exon1_15	1150	-1052	SNP							A	T	A	A	A	T	A	T	A	T	T	A	A	A	A	A	A	A	A	A	A	A	A	A	A	A	A	A	A	A	A	T	T	A	A	A	A	T	T	A
Exon1_15	1191	-1011	SNP							G	G	G	G	G	G	G	G	G	G	G	G	G	G	G	G	G	G	G	G	G	G	G	G	G	C	G	G	G	G	G	G	G	G	G	G	G	G	G	G
Exon1_15	1223	-979	SNP							A	A	A	A	A	A	A	A	A	A	A	A	A	A	A	A	A	A	A	A	A	A	A	A	A	A	A	A	A	A	G	A	A	G	A	A	A	A	A	A
Exon1_15	1228	-974	SNP							A	A	A	A	A	A	A	A	A	A	A	A	A	A	A	A	A	A	A	G	A	A	A	A	A	A	A	A	A	A	A	A	A	A	A	A	A	A	A	A
Exon1_15	1321	-881	SNP							G	G	G	G	G	G	G	G	G	G	G	G	G	G	G	G	G	G	G	G	G	G	G	G	G	G	G	G	G	G	T	G	G	T	G	G	G	G	G	G
Exon1_15	1354	-848	SNP							G	G	G	G	G	G	G	G	G	G	G	G	G	G	G	G	G	T	T	G	T	T	G	T	T	G	G	T	G	G	G	G	G	G	G	G	G	G	G	G
Exon1_15	1364	-838	SNP							A	A	A	A	A	A	A	A	G	A	A	G	A	A	A	A	A	A	A	A	A	A	G	A	A	A	A	A	A	G	A	A	A	A	G	A	A	A	A	A
Exon1_15	1404	-798	SNP							G	G	G	G	G	G	G	G	G	G	G	G	G	G	G	G	G	G	G	G	T	T	G	T	T	G	G	T	G	G	G	G	G	G	G	G	G	G	G	G
Exon1_15	1656	-546	SNP							G	G	G	A	G	G	G	G	G	G	G	G	A	G	G	G	G	G	G	G	G	G	G	G	G	G	G	G	G	G	G	G	G	G	G	G	G	G	G	G
Exon1_15	1734	-468	SNP							C	C	C	C	C	C	C	C	C	C	C	C	C	C	C	C	C	C	C	C	C	C	C	C	C	C	C	C	C	C	T	C	C	T	C	C	C	C	C	C
Exon1_15	1832	-370	SNP							C	T	C	C	C	T	C	T	C	T	T	C	C	C	C	C	C	C	C	C	C	C	C	C	C	C	C	C	C	C	C	T	T	C	C	C	C	T	T	C
Exon1_15	1861	-341	SNP							A	A	A	A	A	A	A	A	A	A	A	A	A	A	G	A	A	A	A	A	A	A	A	A	A	A	A	A	A	A	A	A	A	A	A	A	A	A	A	A
Exon1_15	1986	-216	INDEL_DEL_1986_1986							T	T	T	-	T	T	T	T	T	T	T	T	-	T	T	T	T	-	-	T	-	-	T	-	-	-	T	-	T	T	T	T	T	T	T	T	T	T	T	T
Exon1_15	1994	-208	SNP							A	A	A	A	A	A	A	A	A	A	A	A	A	A	A	A	A	A	A	A	A	A	A	A	A	A	A	A	A	A	A	A	T	A	A	A	A	A	A	A
Exon1_15	2030	-172	INDEL_DEL_2030_2030							A	-	-	-	-	-	-	-	-	-	-	-	-	-	-	-	-	-	-	-	-	-	-	-	-	-	-	-	-	-	-	-	-	-	-	-	-	-	-	-
Exon1_15	2042	-160	SNP							C	C	T	C	T	C	T	C	C	C	C	C	C	C	C	C	C	C	C	C	C	C	C	C	C	C	C	C	C	C	C	C	C	C	C	C	C	C	C	T
Exon1_15	2100	-102	SNP							G	A	A	A	A	A	A	A	A	A	A	A	A	G	G	G	G	A	A	A	A	A	A	A	A	A	A	A	G	A	A	A	A	A	A	A	A	A	A	A
Exon1_15	2103	-99	SNP							T	A	A	A	A	A	A	A	A	A	A	A	A	T	T	T	T	A	A	A	A	A	A	A	A	A	A	A	T	A	A	A	A	A	A	A	A	A	A	A
Exon1_15	2109	-93	SNP							A	A	A	C	A	A	A	A	A	A	A	A	C	A	A	A	A	C	C	C	C	C	A	C	C	C	C	C	A	A	C	A	A	C	A	C	C	A	A	A
Exon1_15	2197	-5	SNP							A	A	A	A	A	A	A	A	A	A	A	A	A	A	A	A	A	A	A	C	A	A	A	A	A	A	C	A	A	A	A	A	A	A	A	C	C	A	A	A
Exon1_15	2373	171	SNP							C	C	C	C	C	C	C	C	C	C	C	C	C	C	C	C	C	C	C	C	C	C	C	C	C	C	C	C	C	C	C	C	C	C	C	C	C	C	C	C
Exon1_15	2386	184	SNP							G	G	G	G	G	G	G	G	G	G	G	G	G	G	G	G	G	G	G	G	G	G	G	G	G	G	G	G	G	G	G	G	G	G	G	G	G	G	G	G
Exon1_15	2394	192	SNP							A	A	T	T	T	A	T	A	A	A	A	A	T	A	A	A	A	T	T	A	T	T	A	T	T	T	T	T	A	A	A	A	A	A	A	A	A	A	A	T
Exon1_15	2488	286	SNP							G	G	G	G	G	G	G	G	G	G	G	G	G	G	G	G	G	T	T	G	T	T	G	T	T	G	G	T	G	G	G	G	G	G	G	G	G	G	G	G
Exon1_15	2535	333	SNP							A	A	A	A	A	A	A	A	A	A	A	A	A	A	A	A	A	A	A	A	A	A	A	G	A	A	A	G	A	A	A	A	A	A	A	A	A	A	A	A
Exon1_15	2554	352	SNP							T	T	T	T	T	T	T	T	T	T	T	T	T	T	T	T	T	T	T	G	T	T	T	T	T	T	T	T	T	T	T	T	T	T	T	T	T	T	T	T
Exon1_15	2583	381	SNP							G	G	G	G	G	G	G	G	C	G	G	C	G	G	G	G	G	G	G	G	G	G	C	G	G	G	G	G	G	C	G	G	G	G	C	G	G	G	G	G
Exon1_15	2614	412	SNP							G	A	G	G	G	A	G	A	G	A	A	G	G	G	G	G	G	G	G	G	G	G	G	G	G	G	G	G	G	G	G	A	A	G	G	G	G	A	A	G
Exon1_15	2623	421	SNP							T	T	T	T	T	T	T	T	T	T	T	T	T	T	T	T	T	C	T	T	T	T	T	T	-	T	T	T	T	T	T	T	T	T	T	T	T	T	T	T
Exon1_15	2624	422	SNP							T	-	T	T	T	-	T	-	T	-	-	T	T	T	T	T	T	G	T	T	T	T	T	T	-	T	T	T	T	T	T	-	-	T	T	T	T	-	-	T
Exon1_15	2624	422	INDEL_DEL_2624_2624							T	-	T	T	T	-	T	-	T	-	-	T	T	T	T	T	T	G	T	T	T	T	T	T	-	T	T	T	T	T	T	-	-	T	T	T	T	-	-	T
Exon1_15	2625	423	SNP							C	C	C	C	C	C	C	C	C	C	C	C	C	C	C	C	C	T	C	C	C	C	C	C	-	C	C	C	C	C	C	C	C	C	C	C	C	C	C	C
Exon1_15	2628	426	SNP							G	G	G	G	G	G	G	G	G	G	G	G	G	G	G	G	G	T	T	G	G	G	G	G	-	G	G	G	G	G	G	G	G	G	G	G	G	G	G	G
Exon1_15	2639	437	INDEL_DEL_2639_2640							TT	T-	TT	TT	TT	T-	T-	T-	TT	TT	T-	TT	TT	TT	TT	TT	TT	--	--	TT	TT	TT	TT	TT	--	TT	TT	TT	TT	TT	TT	TT	T-	TT	TT	TT	TT	T-	TT	TT
Exon1_15	2640	438	INDEL_DEL_2640_2641							TT	--	TT	TT	TT	--	--	--	TT	TT	--	TT	TT	T-	TT	TT	TT	--	--	TT	T-	T-	TT	TT	--	TT	TT	TT	TT	TT	TT	TT	--	TT	TT	TT	TT	--	TT	TT
Exon1_15	2641	439	INDEL_DEL_2641_2641							T	-	T	T	T	-	-	-	T	T	-	T	T	-	T	T	T	-	-	T	-	-	T	T	-	T	T	T	T	T	T	T	-	T	T	T	T	-	T	T
Exon1_15	2666	464	SNP							C	C	C	C	C	C	C	C	T	C	C	T	C	T	T	T	T	C	C	C	C	C	T	C	C	C	C	C	T	T	C	C	C	C	T	C	C	C	C	C
Exon1_15	2765	563	SNP							C	C	C	C	C	C	C	C	G	C	C	G	C	G	G	G	G	C	C	C	C	C	G	C	C	C	C	C	G	G	C	C	C	C	G	C	C	C	C	C
Exon1_15	2839	637	SNP							A	A	A	A	A	A	A	A	C	A	A	C	A	C	C	C	C	A	A	A	A	A	C	A	A	A	A	A	C	C	A	A	A	A	C	A	A	A	A	A
Exon1_15	3079	877	SNP							A	A	A	A	A	A	A	A	A	A	A	A	A	A	A	A	A	A	A	A	A	A	A	A	A	A	A	A	A	A	A	A	A	A	A	A	A	T	A	A
Exon1_15	3097	895	SNP							C	C	C	C	C	C	C	C	C	C	C	C	C	C	C	C	C	T	T	C	T	T	C	T	T	C	C	T	C	C	C	C	C	C	C	C	C	C	C	C
Exon1_15	3145	943	SNP							C	C	C	C	C	C	C	C	C	C	C	C	C	C	C	C	C	C	C	C	C	C	C	C	C	C	C	C	C	C	C	C	C	C	C	C	C	C	C	C
Exon1_15	3288	1086	SNP							A	G	A	A	A	G	A	G	A	G	G	A	A	A	A	A	A	A	A	A	A	A	A	A	A	A	A	A	A	A	A	G	G	A	A	A	A	G	G	A
Exon1_15	3332	1130	SNP							A	A	A	G	A	A	A	A	A	A	A	A	G	A	A	A	A	A	A	G	A	A	A	A	A	G	G	A	A	A	G	A	A	G	A	G	G	A	A	A
Exon1_15	3503	1301	INDEL_DEL_3503_3503							-	-	-	C	-	-	-	-	-	-	-	-	C	-	-	-	-	-	-	-	-	-	-	-	-	-	-	-	-	-	-	-	-	-	-	-	-	-	-	-
Exon1_15	3505	1303	INDEL_DEL_3505_3505							T	T	T	T	T	T	T	T	T	T	T	T	T	-	-	T	-	T	T	T	T	T	T	T	T	T	T	T	-	T	T	T	T	T	T	T	T	T	T	T
Exon1_15	3589	1387	SNP							G	C	C	C	C	C	C	C	C	C	C	C	C	C	C	C	C	C	C	C	C	C	C	C	C	C	C	C	C	C	C	C	C	C	C	C	C	C	C	C
Exon1_15	3663	1461	INDEL_DEL_3663_3664							--	--	--	--	--	--	--	--	AA	--	--	AA	--	AA	AA	AA	AA	--	--	--	--	--	AA	--	--	--	--	--	AA	AA	--	--	--	--	AA	--	--	--	--	--
Exon1_15	3772	1570	SNP							C	C	C	C	C	C	C	C	C	C	C	C	C	A	C	C	C	C	C	C	C	C	C	C	C	C	C	C	C	C	C	C	C	C	C	C	C	C	C	C
Exon1_15	3901	1699	INDEL_DEL_3901_3901							-	-	-	-	-	-	-	-	A	-	-	A	-	-	-	-	-	-	-	-	-	-	A	-	-	-	-	-	-	A	-	-	-	-	A	-	-	-	-	-
Exon1_15	3975	1773	SNP							A	A	C	A	C	A	C	A	A	A	A	A	A	A	A	A	A	A	A	A	A	A	A	A	A	A	A	A	A	A	A	A	A	A	A	A	A	A	A	C
Exon1_15	4014	1812	SNP							C	G	G	G	G	G	G	G	G	G	G	G	G	G	G	G	G	G	G	G	G	G	G	G	G	G	G	G	G	G	G	G	G	G	G	G	G	G	G	G
Exon1_15	4026	1824	SNP							C	C	C	C	C	C	C	C	T	C	C	T	C	T	T	T	T	C	C	C	C	C	T	C	C	C	C	C	T	T	C	C	C	C	T	C	C	C	C	C
Exon1_15	4110	1908	SNP							G	G	G	G	G	G	G	G	G	G	G	G	G	G	G	G	G	G	G	G	G	G	G	G	G	A	G	G	G	G	G	G	G	G	G	G	G	G	G	G
Exon1_15	4118	1916	SNP							T	G	T	T	T	G	T	G	T	G	G	T	T	T	T	T	T	T	T	T	T	T	T	T	T	T	T	T	T	T	T	G	G	T	T	T	T	G	G	T
Exon1_15	4263	2061	SNP							T	T	T	T	T	T	T	T	C	T	T	C	T	C	C	C	C	T	T	T	T	T	C	T	T	T	T	T	C	C	T	T	T	T	C	T	T	T	T	T
Exon1_15	4324	2122	SNP							G	G	G	C	G	G	G	G	G	G	G	G	C	G	G	G	G	G	G	G	G	G	G	G	G	G	G	G	G	G	G	G	G	G	G	G	G	G	G	G
Exon1_15	4360	2158	SNP							G	G	G	G	G	G	G	G	G	G	G	G	G	G	G	G	G	C	C	G	C	C	G	C	-	G	G	C	G	G	G	G	G	G	G	G	G	G	G	G
Exon1_15	4550	2348	INDEL_DEL_4550_4551							--	--	--	TT	--	--	--	--	--	--	--	--	TT	--	--	--	--	--	--	--	--	--	--	--	--	--	--	--	--	--	--	--	--	--	--	--	TT	--	--	--
Exon1_15	4682	2480	INDEL_DEL_4682_4682							C	C	C	C	C	C	C	C	C	C	C	C	C	C	C	C	C	C	C	C	C	C	C	C	-	C	-	C	C	C	C	C	C	C	C	C	C	C	C	C
Exon1_15	4962	2760	SNP							G	G	G	G	G	G	G	G	G	G	G	G	G	G	G	G	G	G	G	G	G	G	G	G	A	G	G	G	G	G	G	G	G	G	G	G	G	G	G	G
Exon1_15	4988	2786	SNP							G	G	G	-	G	G	G	G	G	G	G	G	-	G	G	G	G	G	G	T	T	G	G	-	G	G	G	T	G	G	G	G	G	G	G	-	-	G	G	G
Exon1_15	5049	2847	SNP							A	A	A	T	A	A	A	A	A	A	A	A	T	A	A	A	A	A	A	A	A	A	A	A	A	A	A	A	A	A	A	A	A	A	A	A	A	A	A	A
Exon1_15	5142	2940	SNP							A	A	A	A	A	A	A	A	A	A	A	A	A	A	A	A	A	A	A	A	A	A	A	A	A	A	A	A	A	A	A	A	A	A	A	T	A	A	A	A
Exon1_15	5237	3035	INDEL_DEL_5237_5237							-	-	-	-	-	-	-	-	-	-	-	-	-	-	-	-	-	-	-	-	-	-	-	-	-	-	-	-	-	-	-	-	-	-	A	-	-	-	-	-
Exon1_15	5245	3043	SNP							T	T	T	T	T	T	T	T	T	T	T	T	T	T	T	T	T	T	T	T	T	T	T	T	T	T	T	T	T	T	T	T	T	T	T	T	T	T	T	T
Exon1_15	5248	3046	INDEL_DEL_5248_5249							--	--	T-	--	T-	--	TT	--	--	--	--	--	--	--	--	--	--	--	--	--	--	--	--	--	--	--	--	--	--	--	--	--	--	--	--	--	--	T-	--	T-
Exon1_15	5249	3047	INDEL_DEL_5249_5249							-	-	-	-	-	-	T	-	-	-	-	-	-	-	-	-	-	-	-	-	-	-	-	-	-	-	-	-	-	-	-	-	-	-	-	-	-	-	-	-
Exon1_15	5496	3294	SNP							G	G	G	G	G	G	G	G	G	G	G	G	G	A	A	A	A	G	G	G	G	G	G	G	G	G	G	G	A	G	G	G	G	G	G	G	G	G	G	G
Exon1_15	5517	3315	SNP							G	G	G	G	G	G	G	G	G	G	G	G	G	G	G	G	G	G	G	G	G	G	G	G	G	G	G	G	G	G	G	G	G	G	G	G	G	G	G	G
Exon1_15	5573	3371	SNP							T	T	T	T	T	T	T	T	T	T	T	T	T	T	T	T	T	T	T	T	A	T	T	-	T	T	T	T	T	T	T	T	T	T	T	T	T	T	T	T
Exon1_15	5614	3412	SNP							T	T	T	T	T	T	T	T	T	T	A	T	T	T	T	T	T	T	T	-	T	T	T	T	T	-	-	T	T	T	T	T	T	T	T	T	T	T	T	T
Exon1_15	5633	3431	INDEL_DEL_5633_5634							--	--	--	--	--	--	--	--	--	--	--	--	--	--	--	--	--	--	--	--	--	--	--	--	--	--	--	--	--	--	--	--	--	--	AT	--	--	--	--	--
Exon1_15	5980	3778	INDEL_DEL_5980_5980							-	-	-	-	-	-	-	-	-	-	-	-	-	-	-	-	-	-	-	-	-	-	-	-	-	-	-	-	-	-	-	-	-	-	-	-	-	-	-	-
Exon1_15	6126	3924	SNP							T	T	T	T	T	T	T	T	T	T	T	T	T	C	C	C	C	T	T	T	T	T	T	T	T	T	T	T	C	T	T	T	T	T	T	T	T	T	T	T
Exon1_15	6166	3964	SNP							T	T	A	T	A	T	A	T	T	T	T	T	T	T	T	T	T	T	T	T	T	T	T	T	T	T	T	T	T	T	T	T	T	T	T	T	T	A	T	A
Exon1_15	6184	3982	SNP							A	A	C	A	C	A	C	A	A	A	A	A	A	C	C	C	C	A	A	A	A	A	A	A	A	A	A	A	C	A	A	A	A	A	A	A	A	C	A	C
Exon1_15	6185	3983	SNP							A	C	A	C	A	C	A	C	A	C	C	A	C	A	A	A	A	C	C	C	C	A	A	C	C	C	C	C	A	A	A	C	C	A	A	C	C	A	C	A
Exon1_15	6186	3984	SNP							A	A	C	A	C	A	C	A	T	A	A	T	A	A	A	A	A	A	A	A	A	A	T	A	A	A	A	A	A	T	A	A	A	A	T	A	A	C	A	C
Exon1_15	6352	4150	SNP							G	G	G	G	G	G	G	G	G	G	G	G	G	A	A	A	A	G	G	G	G	G	G	G	G	G	G	G	A	G	G	G	G	G	G	G	G	G	G	G
Exon1_15	6374	4172	INDEL_DEL_6374_6374							T	T	T	T	T	T	T	T	T	T	T	T	T	T	T	T	-	T	T	T	T	T	T	T	T	T	T	T	-	T	T	T	T	T	T	T	T	T	T	T
Exon1_15	6455	4253	SNP							A	A	A	A	A	A	A	A	A	A	A	A	A	A	A	A	A	A	A	A	G	G	A	A	A	A	A	A	A	A	A	A	A	A	A	A	A	A	A	A
Exon1_15	6571	4369	INDEL_DEL_6571_6571							T	T	T	T	T	T	T	T	T	T	T	T	T	T	T	T	T	T	T	T	T	T	T	T	T	-	T	T	T	T	T	T	T	T	T	T	T	T	T	T
Exon1_15	6656	4454	INDEL_DEL_6656_6656							T	T	T	T	T	T	T	T	T	T	T	T	T	T	T	T	T	T	-	T	T	T	T	T	T	T	T	T	T	T	T	T	T	T	T	T	T	T	T	T
Exon1_15	6658	4456	SNP							T	T	T	T	T	T	T	T	T	T	C	T	T	T	T	T	T	T	T	T	T	T	T	T	T	T	T	T	T	T	T	T	T	T	T	T	T	T	T	T
Exon1_15	6667	4465	SNP							T	T	T	T	T	T	T	T	T	T	T	T	T	T	T	T	T	T	T	T	T	T	T	T	T	T	T	T	T	T	T	T	T	A	T	T	T	T	T	T
Exon1_15	6668	4466	INDEL_DEL_6668_6668							T	T	T	T	T	T	T	T	T	T	T	T	T	T	T	T	T	T	T	T	T	T	T	T	T	T	T	T	T	T	T	-	T	T	T	T	T	T	T	T
Exon1_15	6681	4479	INDEL_DEL_6681_6681							T	T	-	-	T	T	T	T	T	T	-	T	-	T	T	T	T	T	-	T	T	-	T	T	T	T	T	-	T	T	T	T	-	T	T	T	-	T	-	T
Exon1_15	6826	4624	INDEL_DEL_6826_6827							AT	AT	AT	AT	AT	AT	AT	AT	AT	AT	AT	AT	AT	AT	AT	AT	AT	--	AT	AT	AT	AT	AT	AT	AT	AT	AT	AT	AT	AT	AT	AT	AT	AT	AT	AT	AT	AT	AT	AT
Exon1_15	6830	4628	SNP							G	G	G	G	G	G	G	G	G	G	G	G	G	A	A	A	A	G	G	G	G	G	G	G	G	G	G	G	A	G	G	G	G	G	G	G	G	G	G	G
FLM-delta_23	49	-2153	SNP							A	A	C	C	C	A	C	A	A	A	A	A	C	A	A	A	A	C	C	A	C	C	A	C	C	C	C	C	A	A	A	A	A	A	A	C	C	A	A	C
FLM-delta_23	85	-2117	SNP							T	T	T	T	T	T	T	T	T	T	T	T	T	T	T	T	T	T	T	T	T	T	T	T	T	T	T	T	T	T	T	T	T	T	T	T	T	T	T	T
FLM-delta_23	111	-2091	SNP							C	C	C	C	C	C	C	C	C	C	C	C	C	C	C	C	C	C	C	G	C	C	C	C	C	C	C	C	C	C	C	C	C	C	C	C	C	C	C	C
FLM-delta_23	119	-2083	SNP							T	T	G	G	G	T	G	T	T	T	T	T	G	T	T	T	T	G	G	T	G	G	T	G	G	G	G	G	T	T	T	T	T	T	T	G	G	T	T	G
FLM-delta_23	183	-2019	SNP							A	G	A	A	A	G	A	G	A	G	G	A	A	A	A	A	A	A	A	A	A	A	A	A	A	A	A	A	A	A	A	G	G	A	A	A	A	G	G	A
FLM-delta_23	202	-2000	SNP							A	C	C	C	C	C	C	C	C	C	C	C	C	A	A	A	A	C	C	C	C	C	C	C	C	C	C	C	A	C	C	C	C	C	C	C	C	C	C	C
FLM-delta_23	216	-1986	SNP							G	A	A	A	A	A	A	A	A	A	A	A	A	G	G	G	G	A	A	A	A	A	A	A	A	A	A	A	G	A	A	A	A	A	A	A	A	A	A	A
FLM-delta_23	222	-1980	SNP							G	A	A	A	A	A	A	A	A	A	A	A	A	G	G	G	G	A	A	A	A	A	A	A	A	A	A	A	G	A	A	A	A	A	A	A	A	A	A	A
FLM-delta_23	264	-1938	SNP							C	C	C	C	C	C	C	C	C	C	C	C	C	T	T	T	T	C	C	C	C	C	C	C	C	C	C	C	T	C	C	C	C	C	C	C	C	C	C	C
FLM-delta_23	374	-1828	INDEL_DEL_374_374							T	T	T	T	T	T	T	T	T	T	T	T	T	T	T	T	T	T	T	T	T	T	T	T	T	T	-	T	T	T	T	T	T	T	T	T	T	T	T	T
FLM-delta_23	417	-1785	SNP							G	G	G	G	G	G	G	G	G	G	G	G	G	G	G	G	G	C	C	G	C	C	G	C	G	G	G	C	G	G	G	G	G	G	G	G	G	G	G	G
FLM-delta_23	453	-1749	SNP							T	G	G	G	G	G	G	G	G	G	G	G	G	G	G	G	G	G	G	G	G	G	G	G	G	G	G	G	G	G	G	G	G	G	G	G	G	G	G	G
FLM-delta_23	469	-1733	SNP							C	A	C	C	C	A	C	A	C	A	A	C	C	C	C	C	C	C	C	C	C	C	C	C	C	C	C	C	C	C	C	A	A	C	C	C	C	A	A	C
FLM-delta_23	547	-1655	SNP							C	C	C	C	C	C	C	C	C	C	C	C	C	C	C	C	C	C	C	C	C	C	C	C	C	C	C	C	C	C	C	C	C	C	G	C	C	C	C	C
FLM-delta_23	628	-1574	SNP							G	A	A	A	A	A	A	A	A	A	A	A	A	A	A	A	A	A	A	A	A	A	A	A	A	A	A	A	A	A	A	A	A	A	A	A	A	A	A	A
FLM-delta_23	650	-1552	SNP							G	A	A	A	A	A	A	A	G	A	A	G	A	G	G	G	G	A	A	A	A	A	G	A	A	A	A	A	G	G	A	A	A	A	G	A	A	A	A	A
FLM-delta_23	662	-1540	SNP							A	A	T	T	T	A	T	A	T	A	A	T	T	T	T	C	T	A	A	A	A	A	T	A	T	T	A	A	T	T	A	A	A	A	T	T	T	A	A	T
FLM-delta_23	667	-1535	SNP							T	T	T	T	T	T	T	T	T	T	T	T	T	-	G	-	-	T	T	T	T	T	T	T	T	T	T	T	-	T	T	T	T	T	T	T	T	T	T	T
FLM-delta_23	736	-1466	INDEL_DEL_736_736							A	A	A	A	A	A	A	A	A	A	A	A	A	-	-	-	-	A	A	A	A	A	A	A	A	A	A	A	-	A	A	A	A	A	A	A	A	A	A	A
FLM-delta_23	755	-1447	SNP							G	G	G	G	G	G	G	G	G	G	G	G	G	G	G	G	A	G	G	G	G	G	G	G	G	G	G	G	G	G	G	G	G	G	G	G	G	G	G	G
FLM-delta_23	781	-1421	SNP							T	T	T	T	T	T	T	T	T	T	T	T	T	T	T	T	T	T	T	T	T	T	T	T	T	T	T	C	T	T	T	T	T	T	T	T	T	T	T	T
FLM-delta_23	832	-1370	INDEL_DEL_832_832							A	A	A	-	-	A	-	A	A	A	A	A	-	A	A	A	A	A	A	A	A	A	A	A	A	-	-	A	A	A	A	A	A	A	A	-	-	A	A	-
FLM-delta_23	833	-1369	SNP							A	A	T	T	T	A	T	A	A	A	A	A	T	A	A	A	A	A	A	A	A	A	A	A	A	T	T	A	A	A	A	A	A	A	A	T	T	A	A	T
FLM-delta_23	891	-1311	SNP							G	G	C	C	C	G	C	G	G	G	G	G	C	G	G	G	G	G	G	G	G	G	G	G	G	C	C	G	G	G	G	G	G	G	G	C	C	G	G	C
FLM-delta_23	909	-1293	SNP							T	T	C	C	C	T	C	T	T	T	T	T	C	T	T	T	T	T	T	T	T	T	T	T	T	C	C	T	T	T	T	T	T	T	T	C	C	T	T	C
FLM-delta_23	958	-1244	SNP							T	T	G	C	G	T	G	T	T	T	T	T	C	T	T	T	T	T	T	T	T	T	T	T	T	C	C	T	T	T	T	T	T	T	T	C	C	T	T	G
FLM-delta_23	975	-1227	INDEL_DEL_975_976							GA	GA	GA	GA	GA	GA	GA	GA	GA	GA	GA	GA	GA	GA	GA	GA	GA	GA	GA	GA	GA	GA	GA	GA	GA	GA	GA	--	GA	GA	GA	GA	GA	GA	GA	GA	GA	GA	GA	GA
FLM-delta_23	1007	-1195	INDEL_DEL_1007_1008							T-	T-	TT	TT	--	T-	TT	TT	TT	TT	T-	TT	TT	TT	TT	TT	TT	TT	TT	TT	TT	TT	TT	TT	TT	T-	TT	TT	TT	TT	TT	TT	T-	TT	TT	T-	T-	T-	TT	--
FLM-delta_23	1008	-1194	INDEL_DEL_1008_1008							-	-	T	T	-	-	T	T	T	T	-	T	T	T	T	T	T	T	T	T	T	T	T	T	T	-	T	T	T	T	T	T	-	T	T	-	-	-	T	-
FLM-delta_23	1150	-1052	SNP							A	T	A	A	A	T	A	T	A	T	T	A	A	A	A	A	A	A	A	A	A	A	A	A	A	A	A	A	A	A	A	T	T	A	A	A	A	T	T	A
FLM-delta_23	1191	-1011	SNP							G	G	G	G	G	G	G	G	G	G	G	G	G	G	G	G	G	G	G	G	G	G	G	G	G	C	G	G	G	G	G	G	G	G	G	G	G	G	G	G
FLM-delta_23	1223	-979	SNP							A	A	A	A	A	A	A	A	A	A	A	A	A	A	A	A	A	A	A	A	A	A	A	A	A	A	A	A	A	A	G	A	A	G	A	A	A	A	A	A
FLM-delta_23	1228	-974	SNP							A	A	A	A	A	A	A	A	A	A	A	A	A	A	A	A	A	A	A	G	A	A	A	A	A	A	A	A	A	A	A	A	A	A	A	A	A	A	A	A
FLM-delta_23	1321	-881	SNP							G	G	G	G	G	G	G	G	G	G	G	G	G	G	G	G	G	G	G	G	G	G	G	G	G	G	G	G	G	G	T	G	G	T	G	G	G	G	G	G
FLM-delta_23	1354	-848	SNP							G	G	G	G	G	G	G	G	G	G	G	G	G	G	G	G	G	T	T	G	T	T	G	T	T	G	G	T	G	G	G	G	G	G	G	G	G	G	G	G
FLM-delta_23	1364	-838	SNP							A	A	A	A	A	A	A	A	G	A	A	G	A	A	A	A	A	A	A	A	A	A	G	A	A	A	A	A	A	G	A	A	A	A	G	A	A	A	A	A
FLM-delta_23	1404	-798	SNP							G	G	G	G	G	G	G	G	G	G	G	G	G	G	G	G	G	G	G	G	T	T	G	T	T	G	G	T	G	G	G	G	G	G	G	G	G	G	G	G
FLM-delta_23	1656	-546	SNP							G	G	G	A	G	G	G	G	G	G	G	G	A	G	G	G	G	G	G	G	G	G	G	G	G	G	G	G	G	G	G	G	G	G	G	G	G	G	G	G
FLM-delta_23	1734	-468	SNP							C	C	C	C	C	C	C	C	C	C	C	C	C	C	C	C	C	C	C	C	C	C	C	C	C	C	C	C	C	C	T	C	C	T	C	C	C	C	C	C
FLM-delta_23	1832	-370	SNP							C	T	C	C	C	T	C	T	C	T	T	C	C	C	C	C	C	C	C	C	C	C	C	C	C	C	C	C	C	C	C	T	T	C	C	C	C	T	T	C
FLM-delta_23	1861	-341	SNP							A	A	A	A	A	A	A	A	A	A	A	A	A	A	G	A	A	A	A	A	A	A	A	A	A	A	A	A	A	A	A	A	A	A	A	A	A	A	A	A
FLM-delta_23	1986	-216	INDEL_DEL_1986_1986							T	T	T	-	T	T	T	T	T	T	T	T	-	T	T	T	T	-	-	T	-	-	T	-	-	-	T	-	T	T	T	T	T	T	T	T	T	T	T	T
FLM-delta_23	1994	-208	SNP							A	A	A	A	A	A	A	A	A	A	A	A	A	A	A	A	A	A	A	A	A	A	A	A	A	A	A	A	A	A	A	A	T	A	A	A	A	A	A	A
FLM-delta_23	2030	-172	INDEL_DEL_2030_2030							A	-	-	-	-	-	-	-	-	-	-	-	-	-	-	-	-	-	-	-	-	-	-	-	-	-	-	-	-	-	-	-	-	-	-	-	-	-	-	-
FLM-delta_23	2042	-160	SNP							C	C	T	C	T	C	T	C	C	C	C	C	C	C	C	C	C	C	C	C	C	C	C	C	C	C	C	C	C	C	C	C	C	C	C	C	C	C	C	T
FLM-delta_23	2100	-102	SNP							G	A	A	A	A	A	A	A	A	A	A	A	A	G	G	G	G	A	A	A	A	A	A	A	A	A	A	A	G	A	A	A	A	A	A	A	A	A	A	A
FLM-delta_23	2103	-99	SNP							T	A	A	A	A	A	A	A	A	A	A	A	A	T	T	T	T	A	A	A	A	A	A	A	A	A	A	A	T	A	A	A	A	A	A	A	A	A	A	A
FLM-delta_23	2109	-93	SNP							A	A	A	C	A	A	A	A	A	A	A	A	C	A	A	A	A	C	C	C	C	C	A	C	C	C	C	C	A	A	C	A	A	C	A	C	C	A	A	A
FLM-delta_23	2197	-5	SNP							A	A	A	A	A	A	A	A	A	A	A	A	A	A	A	A	A	A	A	C	A	A	A	A	A	A	C	A	A	A	A	A	A	A	A	C	C	A	A	A
FLM-delta_23	2373	171	SNP							C	C	C	C	C	C	C	C	C	C	C	C	C	C	C	C	C	C	C	C	C	C	C	C	C	C	C	C	C	C	C	C	C	C	C	C	C	C	C	C
FLM-delta_23	2386	184	SNP							G	G	G	G	G	G	G	G	G	G	G	G	G	G	G	G	G	G	G	G	G	G	G	G	G	G	G	G	G	G	G	G	G	G	G	G	G	G	G	G
FLM-delta_23	2394	192	SNP							A	A	T	T	T	A	T	A	A	A	A	A	T	A	A	A	A	T	T	A	T	T	A	T	T	T	T	T	A	A	A	A	A	A	A	A	A	A	A	T
FLM-delta_23	2488	286	SNP							G	G	G	G	G	G	G	G	G	G	G	G	G	G	G	G	G	T	T	G	T	T	G	T	T	G	G	T	G	G	G	G	G	G	G	G	G	G	G	G
FLM-delta_23	2535	333	SNP							A	A	A	A	A	A	A	A	A	A	A	A	A	A	A	A	A	A	A	A	A	A	A	G	A	A	A	G	A	A	A	A	A	A	A	A	A	A	A	A
FLM-delta_23	2554	352	SNP							T	T	T	T	T	T	T	T	T	T	T	T	T	T	T	T	T	T	T	G	T	T	T	T	T	T	T	T	T	T	T	T	T	T	T	T	T	T	T	T
FLM-delta_23	2583	381	SNP							G	G	G	G	G	G	G	G	C	G	G	C	G	G	G	G	G	G	G	G	G	G	C	G	G	G	G	G	G	C	G	G	G	G	C	G	G	G	G	G
FLM-delta_23	2614	412	SNP							G	A	G	G	G	A	G	A	G	A	A	G	G	G	G	G	G	G	G	G	G	G	G	G	G	G	G	G	G	G	G	A	A	G	G	G	G	A	A	G
FLM-delta_23	2623	421	SNP							T	T	T	T	T	T	T	T	T	T	T	T	T	T	T	T	T	C	T	T	T	T	T	T	-	T	T	T	T	T	T	T	T	T	T	T	T	T	T	T
FLM-delta_23	2624	422	SNP							T	-	T	T	T	-	T	-	T	-	-	T	T	T	T	T	T	G	T	T	T	T	T	T	-	T	T	T	T	T	T	-	-	T	T	T	T	-	-	T
FLM-delta_23	2624	422	INDEL_DEL_2624_2624							T	-	T	T	T	-	T	-	T	-	-	T	T	T	T	T	T	G	T	T	T	T	T	T	-	T	T	T	T	T	T	-	-	T	T	T	T	-	-	T
FLM-delta_23	2625	423	SNP							C	C	C	C	C	C	C	C	C	C	C	C	C	C	C	C	C	T	C	C	C	C	C	C	-	C	C	C	C	C	C	C	C	C	C	C	C	C	C	C
FLM-delta_23	2628	426	SNP							G	G	G	G	G	G	G	G	G	G	G	G	G	G	G	G	G	T	T	G	G	G	G	G	-	G	G	G	G	G	G	G	G	G	G	G	G	G	G	G
FLM-delta_23	2639	437	INDEL_DEL_2639_2640							TT	T-	TT	TT	TT	T-	T-	T-	TT	TT	T-	TT	TT	TT	TT	TT	TT	--	--	TT	TT	TT	TT	TT	--	TT	TT	TT	TT	TT	TT	TT	T-	TT	TT	TT	TT	T-	TT	TT
FLM-delta_23	2640	438	INDEL_DEL_2640_2641							TT	--	TT	TT	TT	--	--	--	TT	TT	--	TT	TT	T-	TT	TT	TT	--	--	TT	T-	T-	TT	TT	--	TT	TT	TT	TT	TT	TT	TT	--	TT	TT	TT	TT	--	TT	TT
FLM-delta_23	2641	439	INDEL_DEL_2641_2641							T	-	T	T	T	-	-	-	T	T	-	T	T	-	T	T	T	-	-	T	-	-	T	T	-	T	T	T	T	T	T	T	-	T	T	T	T	-	T	T
FLM-delta_23	2666	464	SNP							C	C	C	C	C	C	C	C	T	C	C	T	C	T	T	T	T	C	C	C	C	C	T	C	C	C	C	C	T	T	C	C	C	C	T	C	C	C	C	C
FLM-delta_23	2765	563	SNP							C	C	C	C	C	C	C	C	G	C	C	G	C	G	G	G	G	C	C	C	C	C	G	C	C	C	C	C	G	G	C	C	C	C	G	C	C	C	C	C
FLM-delta_23	2839	637	SNP							A	A	A	A	A	A	A	A	C	A	A	C	A	C	C	C	C	A	A	A	A	A	C	A	A	A	A	A	C	C	A	A	A	A	C	A	A	A	A	A
FLM-delta_23	3079	877	SNP							A	A	A	A	A	A	A	A	A	A	A	A	A	A	A	A	A	A	A	A	A	A	A	A	A	A	A	A	A	A	A	A	A	A	A	A	A	T	A	A
FLM-delta_23	3097	895	SNP							C	C	C	C	C	C	C	C	C	C	C	C	C	C	C	C	C	T	T	C	T	T	C	T	T	C	C	T	C	C	C	C	C	C	C	C	C	C	C	C
FLM-delta_23	3145	943	SNP							C	C	C	C	C	C	C	C	C	C	C	C	C	C	C	C	C	C	C	C	C	C	C	C	C	C	C	C	C	C	C	C	C	C	C	C	C	C	C	C
FLM-delta_23	3288	1086	SNP							A	G	A	A	A	G	A	G	A	G	G	A	A	A	A	A	A	A	A	A	A	A	A	A	A	A	A	A	A	A	A	G	G	A	A	A	A	G	G	A
FLM-delta_23	3332	1130	SNP							A	A	A	G	A	A	A	A	A	A	A	A	G	A	A	A	A	A	A	G	A	A	A	A	A	G	G	A	A	A	G	A	A	G	A	G	G	A	A	A
FLM-delta_23	3503	1301	INDEL_DEL_3503_3503							-	-	-	C	-	-	-	-	-	-	-	-	C	-	-	-	-	-	-	-	-	-	-	-	-	-	-	-	-	-	-	-	-	-	-	-	-	-	-	-
FLM-delta_23	3505	1303	INDEL_DEL_3505_3505							T	T	T	T	T	T	T	T	T	T	T	T	T	-	-	T	-	T	T	T	T	T	T	T	T	T	T	T	-	T	T	T	T	T	T	T	T	T	T	T
FLM-delta_23	3589	1387	SNP							G	C	C	C	C	C	C	C	C	C	C	C	C	C	C	C	C	C	C	C	C	C	C	C	C	C	C	C	C	C	C	C	C	C	C	C	C	C	C	C
FLM-delta_23	3663	1461	INDEL_DEL_3663_3664							--	--	--	--	--	--	--	--	AA	--	--	AA	--	AA	AA	AA	AA	--	--	--	--	--	AA	--	--	--	--	--	AA	AA	--	--	--	--	AA	--	--	--	--	--
FLM-delta_23	3772	1570	SNP							C	C	C	C	C	C	C	C	C	C	C	C	C	A	C	C	C	C	C	C	C	C	C	C	C	C	C	C	C	C	C	C	C	C	C	C	C	C	C	C
FLM-delta_23	3901	1699	INDEL_DEL_3901_3901							-	-	-	-	-	-	-	-	A	-	-	A	-	-	-	-	-	-	-	-	-	-	A	-	-	-	-	-	-	A	-	-	-	-	A	-	-	-	-	-
FLM-delta_23	3975	1773	SNP							A	A	C	A	C	A	C	A	A	A	A	A	A	A	A	A	A	A	A	A	A	A	A	A	A	A	A	A	A	A	A	A	A	A	A	A	A	A	A	C
FLM-delta_23	4014	1812	SNP							C	G	G	G	G	G	G	G	G	G	G	G	G	G	G	G	G	G	G	G	G	G	G	G	G	G	G	G	G	G	G	G	G	G	G	G	G	G	G	G
FLM-delta_23	4026	1824	SNP							C	C	C	C	C	C	C	C	T	C	C	T	C	T	T	T	T	C	C	C	C	C	T	C	C	C	C	C	T	T	C	C	C	C	T	C	C	C	C	C
FLM-delta_23	4110	1908	SNP							G	G	G	G	G	G	G	G	G	G	G	G	G	G	G	G	G	G	G	G	G	G	G	G	G	A	G	G	G	G	G	G	G	G	G	G	G	G	G	G
FLM-delta_23	4118	1916	SNP							T	G	T	T	T	G	T	G	T	G	G	T	T	T	T	T	T	T	T	T	T	T	T	T	T	T	T	T	T	T	T	G	G	T	T	T	T	G	G	T
FLM-delta_23	4263	2061	SNP							T	T	T	T	T	T	T	T	C	T	T	C	T	C	C	C	C	T	T	T	T	T	C	T	T	T	T	T	C	C	T	T	T	T	C	T	T	T	T	T
FLM-delta_23	4324	2122	SNP							G	G	G	C	G	G	G	G	G	G	G	G	C	G	G	G	G	G	G	G	G	G	G	G	G	G	G	G	G	G	G	G	G	G	G	G	G	G	G	G
FLM-delta_23	4360	2158	SNP							G	G	G	G	G	G	G	G	G	G	G	G	G	G	G	G	G	C	C	G	C	C	G	C	-	G	G	C	G	G	G	G	G	G	G	G	G	G	G	G
FLM-delta_23	4550	2348	INDEL_DEL_4550_4551							--	--	--	TT	--	--	--	--	--	--	--	--	TT	--	--	--	--	--	--	--	--	--	--	--	--	--	--	--	--	--	--	--	--	--	--	--	TT	--	--	--
FLM-delta_23	4682	2480	INDEL_DEL_4682_4682							C	C	C	C	C	C	C	C	C	C	C	C	C	C	C	C	C	C	C	C	C	C	C	C	-	C	-	C	C	C	C	C	C	C	C	C	C	C	C	C
FLM-delta_23	4962	2760	SNP							G	G	G	G	G	G	G	G	G	G	G	G	G	G	G	G	G	G	G	G	G	G	G	G	A	G	G	G	G	G	G	G	G	G	G	G	G	G	G	G
FLM-delta_23	4988	2786	SNP							G	G	G	-	G	G	G	G	G	G	G	G	-	G	G	G	G	G	G	T	T	G	G	-	G	G	G	T	G	G	G	G	G	G	G	-	-	G	G	G
FLM-delta_23	5049	2847	SNP							A	A	A	T	A	A	A	A	A	A	A	A	T	A	A	A	A	A	A	A	A	A	A	A	A	A	A	A	A	A	A	A	A	A	A	A	A	A	A	A
FLM-delta_23	5142	2940	SNP							A	A	A	A	A	A	A	A	A	A	A	A	A	A	A	A	A	A	A	A	A	A	A	A	A	A	A	A	A	A	A	A	A	A	A	T	A	A	A	A
FLM-delta_23	5237	3035	INDEL_DEL_5237_5237							-	-	-	-	-	-	-	-	-	-	-	-	-	-	-	-	-	-	-	-	-	-	-	-	-	-	-	-	-	-	-	-	-	-	A	-	-	-	-	-
FLM-delta_23	5245	3043	SNP							T	T	T	T	T	T	T	T	T	T	T	T	T	T	T	T	T	T	T	T	T	T	T	T	T	T	T	T	T	T	T	T	T	T	T	T	T	T	T	T
FLM-delta_23	5248	3046	INDEL_DEL_5248_5249							--	--	T-	--	T-	--	TT	--	--	--	--	--	--	--	--	--	--	--	--	--	--	--	--	--	--	--	--	--	--	--	--	--	--	--	--	--	--	T-	--	T-
FLM-delta_23	5249	3047	INDEL_DEL_5249_5249							-	-	-	-	-	-	T	-	-	-	-	-	-	-	-	-	-	-	-	-	-	-	-	-	-	-	-	-	-	-	-	-	-	-	-	-	-	-	-	-
FLM-delta_23	5496	3294	SNP							G	G	G	G	G	G	G	G	G	G	G	G	G	A	A	A	A	G	G	G	G	G	G	G	G	G	G	G	A	G	G	G	G	G	G	G	G	G	G	G
FLM-delta_23	5517	3315	SNP							G	G	G	G	G	G	G	G	G	G	G	G	G	G	G	G	G	G	G	G	G	G	G	G	G	G	G	G	G	G	G	G	G	G	G	G	G	G	G	G
FLM-delta_23	5573	3371	SNP							T	T	T	T	T	T	T	T	T	T	T	T	T	T	T	T	T	T	T	T	A	T	T	-	T	T	T	T	T	T	T	T	T	T	T	T	T	T	T	T
FLM-delta_23	5614	3412	SNP							T	T	T	T	T	T	T	T	T	T	A	T	T	T	T	T	T	T	T	-	T	T	T	T	T	-	-	T	T	T	T	T	T	T	T	T	T	T	T	T
FLM-delta_23	5633	3431	INDEL_DEL_5633_5634							--	--	--	--	--	--	--	--	--	--	--	--	--	--	--	--	--	--	--	--	--	--	--	--	--	--	--	--	--	--	--	--	--	--	AT	--	--	--	--	--
FLM-delta_23	5980	3778	INDEL_DEL_5980_5980							-	-	-	-	-	-	-	-	-	-	-	-	-	-	-	-	-	-	-	-	-	-	-	-	-	-	-	-	-	-	-	-	-	-	-	-	-	-	-	-
FLM-delta_23	6126	3924	SNP							T	T	T	T	T	T	T	T	T	T	T	T	T	C	C	C	C	T	T	T	T	T	T	T	T	T	T	T	C	T	T	T	T	T	T	T	T	T	T	T
FLM-delta_23	6166	3964	SNP							T	T	A	T	A	T	A	T	T	T	T	T	T	T	T	T	T	T	T	T	T	T	T	T	T	T	T	T	T	T	T	T	T	T	T	T	T	A	T	A
FLM-delta_23	6184	3982	SNP							A	A	C	A	C	A	C	A	A	A	A	A	A	C	C	C	C	A	A	A	A	A	A	A	A	A	A	A	C	A	A	A	A	A	A	A	A	C	A	C
FLM-delta_23	6185	3983	SNP							A	C	A	C	A	C	A	C	A	C	C	A	C	A	A	A	A	C	C	C	C	A	A	C	C	C	C	C	A	A	A	C	C	A	A	C	C	A	C	A
FLM-delta_23	6186	3984	SNP							A	A	C	A	C	A	C	A	T	A	A	T	A	A	A	A	A	A	A	A	A	A	T	A	A	A	A	A	A	T	A	A	A	A	T	A	A	C	A	C
FLM-delta_23	6352	4150	SNP							G	G	G	G	G	G	G	G	G	G	G	G	G	A	A	A	A	G	G	G	G	G	G	G	G	G	G	G	A	G	G	G	G	G	G	G	G	G	G	G
FLM-delta_23	6374	4172	INDEL_DEL_6374_6374							T	T	T	T	T	T	T	T	T	T	T	T	T	T	T	T	-	T	T	T	T	T	T	T	T	T	T	T	-	T	T	T	T	T	T	T	T	T	T	T
FLM-delta_23	6455	4253	SNP							A	A	A	A	A	A	A	A	A	A	A	A	A	A	A	A	A	A	A	A	G	G	A	A	A	A	A	A	A	A	A	A	A	A	A	A	A	A	A	A
FLM-delta_23	6571	4369	INDEL_DEL_6571_6571							T	T	T	T	T	T	T	T	T	T	T	T	T	T	T	T	T	T	T	T	T	T	T	T	T	-	T	T	T	T	T	T	T	T	T	T	T	T	T	T
FLM-delta_23	6656	4454	INDEL_DEL_6656_6656							T	T	T	T	T	T	T	T	T	T	T	T	T	T	T	T	T	T	-	T	T	T	T	T	T	T	T	T	T	T	T	T	T	T	T	T	T	T	T	T
FLM-delta_23	6658	4456	SNP							T	T	T	T	T	T	T	T	T	T	C	T	T	T	T	T	T	T	T	T	T	T	T	T	T	T	T	T	T	T	T	T	T	T	T	T	T	T	T	T
FLM-delta_23	6667	4465	SNP							T	T	T	T	T	T	T	T	T	T	T	T	T	T	T	T	T	T	T	T	T	T	T	T	T	T	T	T	T	T	T	T	T	A	T	T	T	T	T	T
FLM-delta_23	6668	4466	INDEL_DEL_6668_6668							T	T	T	T	T	T	T	T	T	T	T	T	T	T	T	T	T	T	T	T	T	T	T	T	T	T	T	T	T	T	T	-	T	T	T	T	T	T	T	T
FLM-delta_23	6681	4479	INDEL_DEL_6681_6681							T	T	-	-	T	T	T	T	T	T	-	T	-	T	T	T	T	T	-	T	T	-	T	T	T	T	T	-	T	T	T	T	-	T	T	T	-	T	-	T
FLM-delta_23	6826	4624	INDEL_DEL_6826_6827							AT	AT	AT	AT	AT	AT	AT	AT	AT	AT	AT	AT	AT	AT	AT	AT	AT	--	AT	AT	AT	AT	AT	AT	AT	AT	AT	AT	AT	AT	AT	AT	AT	AT	AT	AT	AT	AT	AT	AT
FLM-delta_23	6830	4628	SNP							G	G	G	G	G	G	G	G	G	G	G	G	G	A	A	A	A	G	G	G	G	G	G	G	G	G	G	G	A	G	G	G	G	G	G	G	G	G	G	G
FLM-delta_15	49	-2153	SNP							A	A	C	C	C	A	C	A	A	A	A	A	C	A	A	A	A	C	C	A	C	C	A	C	C	C	C	C	A	A	A	A	A	A	A	C	C	A	A	C
FLM-delta_15	85	-2117	SNP							T	T	T	T	T	T	T	T	T	T	T	T	T	T	T	T	T	T	T	T	T	T	T	T	T	T	T	T	T	T	T	T	T	T	T	T	T	T	T	T
FLM-delta_15	111	-2091	SNP							C	C	C	C	C	C	C	C	C	C	C	C	C	C	C	C	C	C	C	G	C	C	C	C	C	C	C	C	C	C	C	C	C	C	C	C	C	C	C	C
FLM-delta_15	119	-2083	SNP							T	T	G	G	G	T	G	T	T	T	T	T	G	T	T	T	T	G	G	T	G	G	T	G	G	G	G	G	T	T	T	T	T	T	T	G	G	T	T	G
FLM-delta_15	183	-2019	SNP							A	G	A	A	A	G	A	G	A	G	G	A	A	A	A	A	A	A	A	A	A	A	A	A	A	A	A	A	A	A	A	G	G	A	A	A	A	G	G	A
FLM-delta_15	202	-2000	SNP							A	C	C	C	C	C	C	C	C	C	C	C	C	A	A	A	A	C	C	C	C	C	C	C	C	C	C	C	A	C	C	C	C	C	C	C	C	C	C	C
FLM-delta_15	216	-1986	SNP							G	A	A	A	A	A	A	A	A	A	A	A	A	G	G	G	G	A	A	A	A	A	A	A	A	A	A	A	G	A	A	A	A	A	A	A	A	A	A	A
FLM-delta_15	222	-1980	SNP							G	A	A	A	A	A	A	A	A	A	A	A	A	G	G	G	G	A	A	A	A	A	A	A	A	A	A	A	G	A	A	A	A	A	A	A	A	A	A	A
FLM-delta_15	264	-1938	SNP							C	C	C	C	C	C	C	C	C	C	C	C	C	T	T	T	T	C	C	C	C	C	C	C	C	C	C	C	T	C	C	C	C	C	C	C	C	C	C	C
FLM-delta_15	374	-1828	INDEL_DEL_374_374							T	T	T	T	T	T	T	T	T	T	T	T	T	T	T	T	T	T	T	T	T	T	T	T	T	T	-	T	T	T	T	T	T	T	T	T	T	T	T	T
FLM-delta_15	417	-1785	SNP							G	G	G	G	G	G	G	G	G	G	G	G	G	G	G	G	G	C	C	G	C	C	G	C	G	G	G	C	G	G	G	G	G	G	G	G	G	G	G	G
FLM-delta_15	453	-1749	SNP							T	G	G	G	G	G	G	G	G	G	G	G	G	G	G	G	G	G	G	G	G	G	G	G	G	G	G	G	G	G	G	G	G	G	G	G	G	G	G	G
FLM-delta_15	469	-1733	SNP							C	A	C	C	C	A	C	A	C	A	A	C	C	C	C	C	C	C	C	C	C	C	C	C	C	C	C	C	C	C	C	A	A	C	C	C	C	A	A	C
FLM-delta_15	547	-1655	SNP							C	C	C	C	C	C	C	C	C	C	C	C	C	C	C	C	C	C	C	C	C	C	C	C	C	C	C	C	C	C	C	C	C	C	G	C	C	C	C	C
FLM-delta_15	628	-1574	SNP							G	A	A	A	A	A	A	A	A	A	A	A	A	A	A	A	A	A	A	A	A	A	A	A	A	A	A	A	A	A	A	A	A	A	A	A	A	A	A	A
FLM-delta_15	650	-1552	SNP							G	A	A	A	A	A	A	A	G	A	A	G	A	G	G	G	G	A	A	A	A	A	G	A	A	A	A	A	G	G	A	A	A	A	G	A	A	A	A	A
FLM-delta_15	662	-1540	SNP							A	A	T	T	T	A	T	A	T	A	A	T	T	T	T	C	T	A	A	A	A	A	T	A	T	T	A	A	T	T	A	A	A	A	T	T	T	A	A	T
FLM-delta_15	667	-1535	SNP							T	T	T	T	T	T	T	T	T	T	T	T	T	-	G	-	-	T	T	T	T	T	T	T	T	T	T	T	-	T	T	T	T	T	T	T	T	T	T	T
FLM-delta_15	736	-1466	INDEL_DEL_736_736							A	A	A	A	A	A	A	A	A	A	A	A	A	-	-	-	-	A	A	A	A	A	A	A	A	A	A	A	-	A	A	A	A	A	A	A	A	A	A	A
FLM-delta_15	755	-1447	SNP							G	G	G	G	G	G	G	G	G	G	G	G	G	G	G	G	A	G	G	G	G	G	G	G	G	G	G	G	G	G	G	G	G	G	G	G	G	G	G	G
FLM-delta_15	781	-1421	SNP							T	T	T	T	T	T	T	T	T	T	T	T	T	T	T	T	T	T	T	T	T	T	T	T	T	T	T	C	T	T	T	T	T	T	T	T	T	T	T	T
FLM-delta_15	832	-1370	INDEL_DEL_832_832							A	A	A	-	-	A	-	A	A	A	A	A	-	A	A	A	A	A	A	A	A	A	A	A	A	-	-	A	A	A	A	A	A	A	A	-	-	A	A	-
FLM-delta_15	833	-1369	SNP							A	A	T	T	T	A	T	A	A	A	A	A	T	A	A	A	A	A	A	A	A	A	A	A	A	T	T	A	A	A	A	A	A	A	A	T	T	A	A	T
FLM-delta_15	891	-1311	SNP							G	G	C	C	C	G	C	G	G	G	G	G	C	G	G	G	G	G	G	G	G	G	G	G	G	C	C	G	G	G	G	G	G	G	G	C	C	G	G	C
FLM-delta_15	909	-1293	SNP							T	T	C	C	C	T	C	T	T	T	T	T	C	T	T	T	T	T	T	T	T	T	T	T	T	C	C	T	T	T	T	T	T	T	T	C	C	T	T	C
FLM-delta_15	958	-1244	SNP							T	T	G	C	G	T	G	T	T	T	T	T	C	T	T	T	T	T	T	T	T	T	T	T	T	C	C	T	T	T	T	T	T	T	T	C	C	T	T	G
FLM-delta_15	975	-1227	INDEL_DEL_975_976							GA	GA	GA	GA	GA	GA	GA	GA	GA	GA	GA	GA	GA	GA	GA	GA	GA	GA	GA	GA	GA	GA	GA	GA	GA	GA	GA	--	GA	GA	GA	GA	GA	GA	GA	GA	GA	GA	GA	GA
FLM-delta_15	1007	-1195	INDEL_DEL_1007_1008							T-	T-	TT	TT	--	T-	TT	TT	TT	TT	T-	TT	TT	TT	TT	TT	TT	TT	TT	TT	TT	TT	TT	TT	TT	T-	TT	TT	TT	TT	TT	TT	T-	TT	TT	T-	T-	T-	TT	--
FLM-delta_15	1008	-1194	INDEL_DEL_1008_1008							-	-	T	T	-	-	T	T	T	T	-	T	T	T	T	T	T	T	T	T	T	T	T	T	T	-	T	T	T	T	T	T	-	T	T	-	-	-	T	-
FLM-delta_15	1150	-1052	SNP							A	T	A	A	A	T	A	T	A	T	T	A	A	A	A	A	A	A	A	A	A	A	A	A	A	A	A	A	A	A	A	T	T	A	A	A	A	T	T	A
FLM-delta_15	1191	-1011	SNP							G	G	G	G	G	G	G	G	G	G	G	G	G	G	G	G	G	G	G	G	G	G	G	G	G	C	G	G	G	G	G	G	G	G	G	G	G	G	G	G
FLM-delta_15	1223	-979	SNP							A	A	A	A	A	A	A	A	A	A	A	A	A	A	A	A	A	A	A	A	A	A	A	A	A	A	A	A	A	A	G	A	A	G	A	A	A	A	A	A
FLM-delta_15	1228	-974	SNP							A	A	A	A	A	A	A	A	A	A	A	A	A	A	A	A	A	A	A	G	A	A	A	A	A	A	A	A	A	A	A	A	A	A	A	A	A	A	A	A
FLM-delta_15	1321	-881	SNP							G	G	G	G	G	G	G	G	G	G	G	G	G	G	G	G	G	G	G	G	G	G	G	G	G	G	G	G	G	G	T	G	G	T	G	G	G	G	G	G
FLM-delta_15	1354	-848	SNP							G	G	G	G	G	G	G	G	G	G	G	G	G	G	G	G	G	T	T	G	T	T	G	T	T	G	G	T	G	G	G	G	G	G	G	G	G	G	G	G
FLM-delta_15	1364	-838	SNP							A	A	A	A	A	A	A	A	G	A	A	G	A	A	A	A	A	A	A	A	A	A	G	A	A	A	A	A	A	G	A	A	A	A	G	A	A	A	A	A
FLM-delta_15	1404	-798	SNP							G	G	G	G	G	G	G	G	G	G	G	G	G	G	G	G	G	G	G	G	T	T	G	T	T	G	G	T	G	G	G	G	G	G	G	G	G	G	G	G
FLM-delta_15	1656	-546	SNP							G	G	G	A	G	G	G	G	G	G	G	G	A	G	G	G	G	G	G	G	G	G	G	G	G	G	G	G	G	G	G	G	G	G	G	G	G	G	G	G
FLM-delta_15	1734	-468	SNP							C	C	C	C	C	C	C	C	C	C	C	C	C	C	C	C	C	C	C	C	C	C	C	C	C	C	C	C	C	C	T	C	C	T	C	C	C	C	C	C
FLM-delta_15	1832	-370	SNP							C	T	C	C	C	T	C	T	C	T	T	C	C	C	C	C	C	C	C	C	C	C	C	C	C	C	C	C	C	C	C	T	T	C	C	C	C	T	T	C
FLM-delta_15	1861	-341	SNP							A	A	A	A	A	A	A	A	A	A	A	A	A	A	G	A	A	A	A	A	A	A	A	A	A	A	A	A	A	A	A	A	A	A	A	A	A	A	A	A
FLM-delta_15	1986	-216	INDEL_DEL_1986_1986							T	T	T	-	T	T	T	T	T	T	T	T	-	T	T	T	T	-	-	T	-	-	T	-	-	-	T	-	T	T	T	T	T	T	T	T	T	T	T	T
FLM-delta_15	1994	-208	SNP							A	A	A	A	A	A	A	A	A	A	A	A	A	A	A	A	A	A	A	A	A	A	A	A	A	A	A	A	A	A	A	A	T	A	A	A	A	A	A	A
FLM-delta_15	2030	-172	INDEL_DEL_2030_2030							A	-	-	-	-	-	-	-	-	-	-	-	-	-	-	-	-	-	-	-	-	-	-	-	-	-	-	-	-	-	-	-	-	-	-	-	-	-	-	-
FLM-delta_15	2042	-160	SNP							C	C	T	C	T	C	T	C	C	C	C	C	C	C	C	C	C	C	C	C	C	C	C	C	C	C	C	C	C	C	C	C	C	C	C	C	C	C	C	T
FLM-delta_15	2100	-102	SNP							G	A	A	A	A	A	A	A	A	A	A	A	A	G	G	G	G	A	A	A	A	A	A	A	A	A	A	A	G	A	A	A	A	A	A	A	A	A	A	A
FLM-delta_15	2103	-99	SNP							T	A	A	A	A	A	A	A	A	A	A	A	A	T	T	T	T	A	A	A	A	A	A	A	A	A	A	A	T	A	A	A	A	A	A	A	A	A	A	A
FLM-delta_15	2109	-93	SNP							A	A	A	C	A	A	A	A	A	A	A	A	C	A	A	A	A	C	C	C	C	C	A	C	C	C	C	C	A	A	C	A	A	C	A	C	C	A	A	A
FLM-delta_15	2197	-5	SNP							A	A	A	A	A	A	A	A	A	A	A	A	A	A	A	A	A	A	A	C	A	A	A	A	A	A	C	A	A	A	A	A	A	A	A	C	C	A	A	A
FLM-delta_15	2373	171	SNP							C	C	C	C	C	C	C	C	C	C	C	C	C	C	C	C	C	C	C	C	C	C	C	C	C	C	C	C	C	C	C	C	C	C	C	C	C	C	C	C
FLM-delta_15	2386	184	SNP							G	G	G	G	G	G	G	G	G	G	G	G	G	G	G	G	G	G	G	G	G	G	G	G	G	G	G	G	G	G	G	G	G	G	G	G	G	G	G	G
FLM-delta_15	2394	192	SNP							A	A	T	T	T	A	T	A	A	A	A	A	T	A	A	A	A	T	T	A	T	T	A	T	T	T	T	T	A	A	A	A	A	A	A	A	A	A	A	T
FLM-delta_15	2488	286	SNP							G	G	G	G	G	G	G	G	G	G	G	G	G	G	G	G	G	T	T	G	T	T	G	T	T	G	G	T	G	G	G	G	G	G	G	G	G	G	G	G
FLM-delta_15	2535	333	SNP							A	A	A	A	A	A	A	A	A	A	A	A	A	A	A	A	A	A	A	A	A	A	A	G	A	A	A	G	A	A	A	A	A	A	A	A	A	A	A	A
FLM-delta_15	2554	352	SNP							T	T	T	T	T	T	T	T	T	T	T	T	T	T	T	T	T	T	T	G	T	T	T	T	T	T	T	T	T	T	T	T	T	T	T	T	T	T	T	T
FLM-delta_15	2583	381	SNP							G	G	G	G	G	G	G	G	C	G	G	C	G	G	G	G	G	G	G	G	G	G	C	G	G	G	G	G	G	C	G	G	G	G	C	G	G	G	G	G
FLM-delta_15	2614	412	SNP							G	A	G	G	G	A	G	A	G	A	A	G	G	G	G	G	G	G	G	G	G	G	G	G	G	G	G	G	G	G	G	A	A	G	G	G	G	A	A	G
FLM-delta_15	2623	421	SNP							T	T	T	T	T	T	T	T	T	T	T	T	T	T	T	T	T	C	T	T	T	T	T	T	-	T	T	T	T	T	T	T	T	T	T	T	T	T	T	T
FLM-delta_15	2624	422	SNP							T	-	T	T	T	-	T	-	T	-	-	T	T	T	T	T	T	G	T	T	T	T	T	T	-	T	T	T	T	T	T	-	-	T	T	T	T	-	-	T
FLM-delta_15	2624	422	INDEL_DEL_2624_2624							T	-	T	T	T	-	T	-	T	-	-	T	T	T	T	T	T	G	T	T	T	T	T	T	-	T	T	T	T	T	T	-	-	T	T	T	T	-	-	T
FLM-delta_15	2625	423	SNP							C	C	C	C	C	C	C	C	C	C	C	C	C	C	C	C	C	T	C	C	C	C	C	C	-	C	C	C	C	C	C	C	C	C	C	C	C	C	C	C
FLM-delta_15	2628	426	SNP							G	G	G	G	G	G	G	G	G	G	G	G	G	G	G	G	G	T	T	G	G	G	G	G	-	G	G	G	G	G	G	G	G	G	G	G	G	G	G	G
FLM-delta_15	2639	437	INDEL_DEL_2639_2640							TT	T-	TT	TT	TT	T-	T-	T-	TT	TT	T-	TT	TT	TT	TT	TT	TT	--	--	TT	TT	TT	TT	TT	--	TT	TT	TT	TT	TT	TT	TT	T-	TT	TT	TT	TT	T-	TT	TT
FLM-delta_15	2640	438	INDEL_DEL_2640_2641							TT	--	TT	TT	TT	--	--	--	TT	TT	--	TT	TT	T-	TT	TT	TT	--	--	TT	T-	T-	TT	TT	--	TT	TT	TT	TT	TT	TT	TT	--	TT	TT	TT	TT	--	TT	TT
FLM-delta_15	2641	439	INDEL_DEL_2641_2641							T	-	T	T	T	-	-	-	T	T	-	T	T	-	T	T	T	-	-	T	-	-	T	T	-	T	T	T	T	T	T	T	-	T	T	T	T	-	T	T
FLM-delta_15	2666	464	SNP							C	C	C	C	C	C	C	C	T	C	C	T	C	T	T	T	T	C	C	C	C	C	T	C	C	C	C	C	T	T	C	C	C	C	T	C	C	C	C	C
FLM-delta_15	2765	563	SNP							C	C	C	C	C	C	C	C	G	C	C	G	C	G	G	G	G	C	C	C	C	C	G	C	C	C	C	C	G	G	C	C	C	C	G	C	C	C	C	C
FLM-delta_15	2839	637	SNP							A	A	A	A	A	A	A	A	C	A	A	C	A	C	C	C	C	A	A	A	A	A	C	A	A	A	A	A	C	C	A	A	A	A	C	A	A	A	A	A
FLM-delta_15	3079	877	SNP							A	A	A	A	A	A	A	A	A	A	A	A	A	A	A	A	A	A	A	A	A	A	A	A	A	A	A	A	A	A	A	A	A	A	A	A	A	T	A	A
FLM-delta_15	3097	895	SNP							C	C	C	C	C	C	C	C	C	C	C	C	C	C	C	C	C	T	T	C	T	T	C	T	T	C	C	T	C	C	C	C	C	C	C	C	C	C	C	C
FLM-delta_15	3145	943	SNP							C	C	C	C	C	C	C	C	C	C	C	C	C	C	C	C	C	C	C	C	C	C	C	C	C	C	C	C	C	C	C	C	C	C	C	C	C	C	C	C
FLM-delta_15	3288	1086	SNP							A	G	A	A	A	G	A	G	A	G	G	A	A	A	A	A	A	A	A	A	A	A	A	A	A	A	A	A	A	A	A	G	G	A	A	A	A	G	G	A
FLM-delta_15	3332	1130	SNP							A	A	A	G	A	A	A	A	A	A	A	A	G	A	A	A	A	A	A	G	A	A	A	A	A	G	G	A	A	A	G	A	A	G	A	G	G	A	A	A
FLM-delta_15	3503	1301	INDEL_DEL_3503_3503							-	-	-	C	-	-	-	-	-	-	-	-	C	-	-	-	-	-	-	-	-	-	-	-	-	-	-	-	-	-	-	-	-	-	-	-	-	-	-	-
FLM-delta_15	3505	1303	INDEL_DEL_3505_3505							T	T	T	T	T	T	T	T	T	T	T	T	T	-	-	T	-	T	T	T	T	T	T	T	T	T	T	T	-	T	T	T	T	T	T	T	T	T	T	T
FLM-delta_15	3589	1387	SNP							G	C	C	C	C	C	C	C	C	C	C	C	C	C	C	C	C	C	C	C	C	C	C	C	C	C	C	C	C	C	C	C	C	C	C	C	C	C	C	C
FLM-delta_15	3663	1461	INDEL_DEL_3663_3664							--	--	--	--	--	--	--	--	AA	--	--	AA	--	AA	AA	AA	AA	--	--	--	--	--	AA	--	--	--	--	--	AA	AA	--	--	--	--	AA	--	--	--	--	--
FLM-delta_15	3772	1570	SNP							C	C	C	C	C	C	C	C	C	C	C	C	C	A	C	C	C	C	C	C	C	C	C	C	C	C	C	C	C	C	C	C	C	C	C	C	C	C	C	C
FLM-delta_15	3901	1699	INDEL_DEL_3901_3901							-	-	-	-	-	-	-	-	A	-	-	A	-	-	-	-	-	-	-	-	-	-	A	-	-	-	-	-	-	A	-	-	-	-	A	-	-	-	-	-
FLM-delta_15	3975	1773	SNP							A	A	C	A	C	A	C	A	A	A	A	A	A	A	A	A	A	A	A	A	A	A	A	A	A	A	A	A	A	A	A	A	A	A	A	A	A	A	A	C
FLM-delta_15	4014	1812	SNP							C	G	G	G	G	G	G	G	G	G	G	G	G	G	G	G	G	G	G	G	G	G	G	G	G	G	G	G	G	G	G	G	G	G	G	G	G	G	G	G
FLM-delta_15	4026	1824	SNP							C	C	C	C	C	C	C	C	T	C	C	T	C	T	T	T	T	C	C	C	C	C	T	C	C	C	C	C	T	T	C	C	C	C	T	C	C	C	C	C
FLM-delta_15	4110	1908	SNP							G	G	G	G	G	G	G	G	G	G	G	G	G	G	G	G	G	G	G	G	G	G	G	G	G	A	G	G	G	G	G	G	G	G	G	G	G	G	G	G
FLM-delta_15	4118	1916	SNP							T	G	T	T	T	G	T	G	T	G	G	T	T	T	T	T	T	T	T	T	T	T	T	T	T	T	T	T	T	T	T	G	G	T	T	T	T	G	G	T
FLM-delta_15	4263	2061	SNP							T	T	T	T	T	T	T	T	C	T	T	C	T	C	C	C	C	T	T	T	T	T	C	T	T	T	T	T	C	C	T	T	T	T	C	T	T	T	T	T
FLM-delta_15	4324	2122	SNP							G	G	G	C	G	G	G	G	G	G	G	G	C	G	G	G	G	G	G	G	G	G	G	G	G	G	G	G	G	G	G	G	G	G	G	G	G	G	G	G
FLM-delta_15	4360	2158	SNP							G	G	G	G	G	G	G	G	G	G	G	G	G	G	G	G	G	C	C	G	C	C	G	C	-	G	G	C	G	G	G	G	G	G	G	G	G	G	G	G
FLM-delta_15	4550	2348	INDEL_DEL_4550_4551							--	--	--	TT	--	--	--	--	--	--	--	--	TT	--	--	--	--	--	--	--	--	--	--	--	--	--	--	--	--	--	--	--	--	--	--	--	TT	--	--	--
FLM-delta_15	4682	2480	INDEL_DEL_4682_4682							C	C	C	C	C	C	C	C	C	C	C	C	C	C	C	C	C	C	C	C	C	C	C	C	-	C	-	C	C	C	C	C	C	C	C	C	C	C	C	C
FLM-delta_15	4962	2760	SNP							G	G	G	G	G	G	G	G	G	G	G	G	G	G	G	G	G	G	G	G	G	G	G	G	A	G	G	G	G	G	G	G	G	G	G	G	G	G	G	G
FLM-delta_15	4988	2786	SNP							G	G	G	-	G	G	G	G	G	G	G	G	-	G	G	G	G	G	G	T	T	G	G	-	G	G	G	T	G	G	G	G	G	G	G	-	-	G	G	G
FLM-delta_15	5049	2847	SNP							A	A	A	T	A	A	A	A	A	A	A	A	T	A	A	A	A	A	A	A	A	A	A	A	A	A	A	A	A	A	A	A	A	A	A	A	A	A	A	A
FLM-delta_15	5142	2940	SNP							A	A	A	A	A	A	A	A	A	A	A	A	A	A	A	A	A	A	A	A	A	A	A	A	A	A	A	A	A	A	A	A	A	A	A	T	A	A	A	A
FLM-delta_15	5237	3035	INDEL_DEL_5237_5237							-	-	-	-	-	-	-	-	-	-	-	-	-	-	-	-	-	-	-	-	-	-	-	-	-	-	-	-	-	-	-	-	-	-	A	-	-	-	-	-
FLM-delta_15	5245	3043	SNP							T	T	T	T	T	T	T	T	T	T	T	T	T	T	T	T	T	T	T	T	T	T	T	T	T	T	T	T	T	T	T	T	T	T	T	T	T	T	T	T
FLM-delta_15	5248	3046	INDEL_DEL_5248_5249							--	--	T-	--	T-	--	TT	--	--	--	--	--	--	--	--	--	--	--	--	--	--	--	--	--	--	--	--	--	--	--	--	--	--	--	--	--	--	T-	--	T-
FLM-delta_15	5249	3047	INDEL_DEL_5249_5249							-	-	-	-	-	-	T	-	-	-	-	-	-	-	-	-	-	-	-	-	-	-	-	-	-	-	-	-	-	-	-	-	-	-	-	-	-	-	-	-
FLM-delta_15	5496	3294	SNP							G	G	G	G	G	G	G	G	G	G	G	G	G	A	A	A	A	G	G	G	G	G	G	G	G	G	G	G	A	G	G	G	G	G	G	G	G	G	G	G
FLM-delta_15	5517	3315	SNP							G	G	G	G	G	G	G	G	G	G	G	G	G	G	G	G	G	G	G	G	G	G	G	G	G	G	G	G	G	G	G	G	G	G	G	G	G	G	G	G
FLM-delta_15	5573	3371	SNP							T	T	T	T	T	T	T	T	T	T	T	T	T	T	T	T	T	T	T	T	A	T	T	-	T	T	T	T	T	T	T	T	T	T	T	T	T	T	T	T
FLM-delta_15	5614	3412	SNP							T	T	T	T	T	T	T	T	T	T	A	T	T	T	T	T	T	T	T	-	T	T	T	T	T	-	-	T	T	T	T	T	T	T	T	T	T	T	T	T
FLM-delta_15	5633	3431	INDEL_DEL_5633_5634							--	--	--	--	--	--	--	--	--	--	--	--	--	--	--	--	--	--	--	--	--	--	--	--	--	--	--	--	--	--	--	--	--	--	AT	--	--	--	--	--
FLM-delta_15	5980	3778	INDEL_DEL_5980_5980							-	-	-	-	-	-	-	-	-	-	-	-	-	-	-	-	-	-	-	-	-	-	-	-	-	-	-	-	-	-	-	-	-	-	-	-	-	-	-	-
FLM-delta_15	6126	3924	SNP							T	T	T	T	T	T	T	T	T	T	T	T	T	C	C	C	C	T	T	T	T	T	T	T	T	T	T	T	C	T	T	T	T	T	T	T	T	T	T	T
FLM-delta_15	6166	3964	SNP							T	T	A	T	A	T	A	T	T	T	T	T	T	T	T	T	T	T	T	T	T	T	T	T	T	T	T	T	T	T	T	T	T	T	T	T	T	A	T	A
FLM-delta_15	6184	3982	SNP							A	A	C	A	C	A	C	A	A	A	A	A	A	C	C	C	C	A	A	A	A	A	A	A	A	A	A	A	C	A	A	A	A	A	A	A	A	C	A	C
FLM-delta_15	6185	3983	SNP							A	C	A	C	A	C	A	C	A	C	C	A	C	A	A	A	A	C	C	C	C	A	A	C	C	C	C	C	A	A	A	C	C	A	A	C	C	A	C	A
FLM-delta_15	6186	3984	SNP							A	A	C	A	C	A	C	A	T	A	A	T	A	A	A	A	A	A	A	A	A	A	T	A	A	A	A	A	A	T	A	A	A	A	T	A	A	C	A	C
FLM-delta_15	6352	4150	SNP							G	G	G	G	G	G	G	G	G	G	G	G	G	A	A	A	A	G	G	G	G	G	G	G	G	G	G	G	A	G	G	G	G	G	G	G	G	G	G	G
FLM-delta_15	6374	4172	INDEL_DEL_6374_6374							T	T	T	T	T	T	T	T	T	T	T	T	T	T	T	T	-	T	T	T	T	T	T	T	T	T	T	T	-	T	T	T	T	T	T	T	T	T	T	T
FLM-delta_15	6455	4253	SNP							A	A	A	A	A	A	A	A	A	A	A	A	A	A	A	A	A	A	A	A	G	G	A	A	A	A	A	A	A	A	A	A	A	A	A	A	A	A	A	A
FLM-delta_15	6571	4369	INDEL_DEL_6571_6571							T	T	T	T	T	T	T	T	T	T	T	T	T	T	T	T	T	T	T	T	T	T	T	T	T	-	T	T	T	T	T	T	T	T	T	T	T	T	T	T
FLM-delta_15	6656	4454	INDEL_DEL_6656_6656							T	T	T	T	T	T	T	T	T	T	T	T	T	T	T	T	T	T	-	T	T	T	T	T	T	T	T	T	T	T	T	T	T	T	T	T	T	T	T	T
FLM-delta_15	6658	4456	SNP							T	T	T	T	T	T	T	T	T	T	C	T	T	T	T	T	T	T	T	T	T	T	T	T	T	T	T	T	T	T	T	T	T	T	T	T	T	T	T	T
FLM-delta_15	6667	4465	SNP							T	T	T	T	T	T	T	T	T	T	T	T	T	T	T	T	T	T	T	T	T	T	T	T	T	T	T	T	T	T	T	T	T	A	T	T	T	T	T	T
FLM-delta_15	6668	4466	INDEL_DEL_6668_6668							T	T	T	T	T	T	T	T	T	T	T	T	T	T	T	T	T	T	T	T	T	T	T	T	T	T	T	T	T	T	T	-	T	T	T	T	T	T	T	T
FLM-delta_15	6681	4479	INDEL_DEL_6681_6681							T	T	-	-	T	T	T	T	T	T	-	T	-	T	T	T	T	T	-	T	T	-	T	T	T	T	T	-	T	T	T	T	-	T	T	T	-	T	-	T
FLM-delta_15	6826	4624	INDEL_DEL_6826_6827							AT	AT	AT	AT	AT	AT	AT	AT	AT	AT	AT	AT	AT	AT	AT	AT	AT	--	AT	AT	AT	AT	AT	AT	AT	AT	AT	AT	AT	AT	AT	AT	AT	AT	AT	AT	AT	AT	AT	AT
FLM-delta_15	6830	4628	SNP							G	G	G	G	G	G	G	G	G	G	G	G	G	A	A	A	A	G	G	G	G	G	G	G	G	G	G	G	A	G	G	G	G	G	G	G	G	G	G	G
FLM-beta_23	49	-2153	SNP							A	A	C	C	C	A	C	A	A	A	A	A	C	A	A	A	A	C	C	A	C	C	A	C	C	C	C	C	A	A	A	A	A	A	A	C	C	A	A	C
FLM-beta_23	85	-2117	SNP							T	T	T	T	T	T	T	T	T	T	T	T	T	T	T	T	T	T	T	T	T	T	T	T	T	T	T	T	T	T	T	T	T	T	T	T	T	T	T	T
FLM-beta_23	111	-2091	SNP							C	C	C	C	C	C	C	C	C	C	C	C	C	C	C	C	C	C	C	G	C	C	C	C	C	C	C	C	C	C	C	C	C	C	C	C	C	C	C	C
FLM-beta_23	119	-2083	SNP							T	T	G	G	G	T	G	T	T	T	T	T	G	T	T	T	T	G	G	T	G	G	T	G	G	G	G	G	T	T	T	T	T	T	T	G	G	T	T	G
FLM-beta_23	183	-2019	SNP							A	G	A	A	A	G	A	G	A	G	G	A	A	A	A	A	A	A	A	A	A	A	A	A	A	A	A	A	A	A	A	G	G	A	A	A	A	G	G	A
FLM-beta_23	202	-2000	SNP							A	C	C	C	C	C	C	C	C	C	C	C	C	A	A	A	A	C	C	C	C	C	C	C	C	C	C	C	A	C	C	C	C	C	C	C	C	C	C	C
FLM-beta_23	216	-1986	SNP							G	A	A	A	A	A	A	A	A	A	A	A	A	G	G	G	G	A	A	A	A	A	A	A	A	A	A	A	G	A	A	A	A	A	A	A	A	A	A	A
FLM-beta_23	222	-1980	SNP							G	A	A	A	A	A	A	A	A	A	A	A	A	G	G	G	G	A	A	A	A	A	A	A	A	A	A	A	G	A	A	A	A	A	A	A	A	A	A	A
FLM-beta_23	264	-1938	SNP							C	C	C	C	C	C	C	C	C	C	C	C	C	T	T	T	T	C	C	C	C	C	C	C	C	C	C	C	T	C	C	C	C	C	C	C	C	C	C	C
FLM-beta_23	374	-1828	INDEL_DEL_374_374							T	T	T	T	T	T	T	T	T	T	T	T	T	T	T	T	T	T	T	T	T	T	T	T	T	T	-	T	T	T	T	T	T	T	T	T	T	T	T	T
FLM-beta_23	417	-1785	SNP							G	G	G	G	G	G	G	G	G	G	G	G	G	G	G	G	G	C	C	G	C	C	G	C	G	G	G	C	G	G	G	G	G	G	G	G	G	G	G	G
FLM-beta_23	453	-1749	SNP							T	G	G	G	G	G	G	G	G	G	G	G	G	G	G	G	G	G	G	G	G	G	G	G	G	G	G	G	G	G	G	G	G	G	G	G	G	G	G	G
FLM-beta_23	469	-1733	SNP							C	A	C	C	C	A	C	A	C	A	A	C	C	C	C	C	C	C	C	C	C	C	C	C	C	C	C	C	C	C	C	A	A	C	C	C	C	A	A	C
FLM-beta_23	547	-1655	SNP							C	C	C	C	C	C	C	C	C	C	C	C	C	C	C	C	C	C	C	C	C	C	C	C	C	C	C	C	C	C	C	C	C	C	G	C	C	C	C	C
FLM-beta_23	628	-1574	SNP							G	A	A	A	A	A	A	A	A	A	A	A	A	A	A	A	A	A	A	A	A	A	A	A	A	A	A	A	A	A	A	A	A	A	A	A	A	A	A	A
FLM-beta_23	650	-1552	SNP							G	A	A	A	A	A	A	A	G	A	A	G	A	G	G	G	G	A	A	A	A	A	G	A	A	A	A	A	G	G	A	A	A	A	G	A	A	A	A	A
FLM-beta_23	662	-1540	SNP							A	A	T	T	T	A	T	A	T	A	A	T	T	T	T	C	T	A	A	A	A	A	T	A	T	T	A	A	T	T	A	A	A	A	T	T	T	A	A	T
FLM-beta_23	667	-1535	SNP							T	T	T	T	T	T	T	T	T	T	T	T	T	-	G	-	-	T	T	T	T	T	T	T	T	T	T	T	-	T	T	T	T	T	T	T	T	T	T	T
FLM-beta_23	736	-1466	INDEL_DEL_736_736							A	A	A	A	A	A	A	A	A	A	A	A	A	-	-	-	-	A	A	A	A	A	A	A	A	A	A	A	-	A	A	A	A	A	A	A	A	A	A	A
FLM-beta_23	755	-1447	SNP							G	G	G	G	G	G	G	G	G	G	G	G	G	G	G	G	A	G	G	G	G	G	G	G	G	G	G	G	G	G	G	G	G	G	G	G	G	G	G	G
FLM-beta_23	781	-1421	SNP							T	T	T	T	T	T	T	T	T	T	T	T	T	T	T	T	T	T	T	T	T	T	T	T	T	T	T	C	T	T	T	T	T	T	T	T	T	T	T	T
FLM-beta_23	832	-1370	INDEL_DEL_832_832							A	A	A	-	-	A	-	A	A	A	A	A	-	A	A	A	A	A	A	A	A	A	A	A	A	-	-	A	A	A	A	A	A	A	A	-	-	A	A	-
FLM-beta_23	833	-1369	SNP							A	A	T	T	T	A	T	A	A	A	A	A	T	A	A	A	A	A	A	A	A	A	A	A	A	T	T	A	A	A	A	A	A	A	A	T	T	A	A	T
FLM-beta_23	891	-1311	SNP							G	G	C	C	C	G	C	G	G	G	G	G	C	G	G	G	G	G	G	G	G	G	G	G	G	C	C	G	G	G	G	G	G	G	G	C	C	G	G	C
FLM-beta_23	909	-1293	SNP							T	T	C	C	C	T	C	T	T	T	T	T	C	T	T	T	T	T	T	T	T	T	T	T	T	C	C	T	T	T	T	T	T	T	T	C	C	T	T	C
FLM-beta_23	958	-1244	SNP							T	T	G	C	G	T	G	T	T	T	T	T	C	T	T	T	T	T	T	T	T	T	T	T	T	C	C	T	T	T	T	T	T	T	T	C	C	T	T	G
FLM-beta_23	975	-1227	INDEL_DEL_975_976							GA	GA	GA	GA	GA	GA	GA	GA	GA	GA	GA	GA	GA	GA	GA	GA	GA	GA	GA	GA	GA	GA	GA	GA	GA	GA	GA	--	GA	GA	GA	GA	GA	GA	GA	GA	GA	GA	GA	GA
FLM-beta_23	1007	-1195	INDEL_DEL_1007_1008							T-	T-	TT	TT	--	T-	TT	TT	TT	TT	T-	TT	TT	TT	TT	TT	TT	TT	TT	TT	TT	TT	TT	TT	TT	T-	TT	TT	TT	TT	TT	TT	T-	TT	TT	T-	T-	T-	TT	--
FLM-beta_23	1008	-1194	INDEL_DEL_1008_1008							-	-	T	T	-	-	T	T	T	T	-	T	T	T	T	T	T	T	T	T	T	T	T	T	T	-	T	T	T	T	T	T	-	T	T	-	-	-	T	-
FLM-beta_23	1150	-1052	SNP							A	T	A	A	A	T	A	T	A	T	T	A	A	A	A	A	A	A	A	A	A	A	A	A	A	A	A	A	A	A	A	T	T	A	A	A	A	T	T	A
FLM-beta_23	1191	-1011	SNP							G	G	G	G	G	G	G	G	G	G	G	G	G	G	G	G	G	G	G	G	G	G	G	G	G	C	G	G	G	G	G	G	G	G	G	G	G	G	G	G
FLM-beta_23	1223	-979	SNP							A	A	A	A	A	A	A	A	A	A	A	A	A	A	A	A	A	A	A	A	A	A	A	A	A	A	A	A	A	A	G	A	A	G	A	A	A	A	A	A
FLM-beta_23	1228	-974	SNP							A	A	A	A	A	A	A	A	A	A	A	A	A	A	A	A	A	A	A	G	A	A	A	A	A	A	A	A	A	A	A	A	A	A	A	A	A	A	A	A
FLM-beta_23	1321	-881	SNP							G	G	G	G	G	G	G	G	G	G	G	G	G	G	G	G	G	G	G	G	G	G	G	G	G	G	G	G	G	G	T	G	G	T	G	G	G	G	G	G
FLM-beta_23	1354	-848	SNP							G	G	G	G	G	G	G	G	G	G	G	G	G	G	G	G	G	T	T	G	T	T	G	T	T	G	G	T	G	G	G	G	G	G	G	G	G	G	G	G
FLM-beta_23	1364	-838	SNP							A	A	A	A	A	A	A	A	G	A	A	G	A	A	A	A	A	A	A	A	A	A	G	A	A	A	A	A	A	G	A	A	A	A	G	A	A	A	A	A
FLM-beta_23	1404	-798	SNP							G	G	G	G	G	G	G	G	G	G	G	G	G	G	G	G	G	G	G	G	T	T	G	T	T	G	G	T	G	G	G	G	G	G	G	G	G	G	G	G
FLM-beta_23	1656	-546	SNP							G	G	G	A	G	G	G	G	G	G	G	G	A	G	G	G	G	G	G	G	G	G	G	G	G	G	G	G	G	G	G	G	G	G	G	G	G	G	G	G
FLM-beta_23	1734	-468	SNP							C	C	C	C	C	C	C	C	C	C	C	C	C	C	C	C	C	C	C	C	C	C	C	C	C	C	C	C	C	C	T	C	C	T	C	C	C	C	C	C
FLM-beta_23	1832	-370	SNP							C	T	C	C	C	T	C	T	C	T	T	C	C	C	C	C	C	C	C	C	C	C	C	C	C	C	C	C	C	C	C	T	T	C	C	C	C	T	T	C
FLM-beta_23	1861	-341	SNP							A	A	A	A	A	A	A	A	A	A	A	A	A	A	G	A	A	A	A	A	A	A	A	A	A	A	A	A	A	A	A	A	A	A	A	A	A	A	A	A
FLM-beta_23	1986	-216	INDEL_DEL_1986_1986							T	T	T	-	T	T	T	T	T	T	T	T	-	T	T	T	T	-	-	T	-	-	T	-	-	-	T	-	T	T	T	T	T	T	T	T	T	T	T	T
FLM-beta_23	1994	-208	SNP							A	A	A	A	A	A	A	A	A	A	A	A	A	A	A	A	A	A	A	A	A	A	A	A	A	A	A	A	A	A	A	A	T	A	A	A	A	A	A	A
FLM-beta_23	2030	-172	INDEL_DEL_2030_2030							A	-	-	-	-	-	-	-	-	-	-	-	-	-	-	-	-	-	-	-	-	-	-	-	-	-	-	-	-	-	-	-	-	-	-	-	-	-	-	-
FLM-beta_23	2042	-160	SNP							C	C	T	C	T	C	T	C	C	C	C	C	C	C	C	C	C	C	C	C	C	C	C	C	C	C	C	C	C	C	C	C	C	C	C	C	C	C	C	T
FLM-beta_23	2100	-102	SNP							G	A	A	A	A	A	A	A	A	A	A	A	A	G	G	G	G	A	A	A	A	A	A	A	A	A	A	A	G	A	A	A	A	A	A	A	A	A	A	A
FLM-beta_23	2103	-99	SNP							T	A	A	A	A	A	A	A	A	A	A	A	A	T	T	T	T	A	A	A	A	A	A	A	A	A	A	A	T	A	A	A	A	A	A	A	A	A	A	A
FLM-beta_23	2109	-93	SNP							A	A	A	C	A	A	A	A	A	A	A	A	C	A	A	A	A	C	C	C	C	C	A	C	C	C	C	C	A	A	C	A	A	C	A	C	C	A	A	A
FLM-beta_23	2197	-5	SNP							A	A	A	A	A	A	A	A	A	A	A	A	A	A	A	A	A	A	A	C	A	A	A	A	A	A	C	A	A	A	A	A	A	A	A	C	C	A	A	A
FLM-beta_23	2373	171	SNP							C	C	C	C	C	C	C	C	C	C	C	C	C	C	C	C	C	C	C	C	C	C	C	C	C	C	C	C	C	C	C	C	C	C	C	C	C	C	C	C
FLM-beta_23	2386	184	SNP							G	G	G	G	G	G	G	G	G	G	G	G	G	G	G	G	G	G	G	G	G	G	G	G	G	G	G	G	G	G	G	G	G	G	G	G	G	G	G	G
FLM-beta_23	2394	192	SNP							A	A	T	T	T	A	T	A	A	A	A	A	T	A	A	A	A	T	T	A	T	T	A	T	T	T	T	T	A	A	A	A	A	A	A	A	A	A	A	T
FLM-beta_23	2488	286	SNP							G	G	G	G	G	G	G	G	G	G	G	G	G	G	G	G	G	T	T	G	T	T	G	T	T	G	G	T	G	G	G	G	G	G	G	G	G	G	G	G
FLM-beta_23	2535	333	SNP							A	A	A	A	A	A	A	A	A	A	A	A	A	A	A	A	A	A	A	A	A	A	A	G	A	A	A	G	A	A	A	A	A	A	A	A	A	A	A	A
FLM-beta_23	2554	352	SNP							T	T	T	T	T	T	T	T	T	T	T	T	T	T	T	T	T	T	T	G	T	T	T	T	T	T	T	T	T	T	T	T	T	T	T	T	T	T	T	T
FLM-beta_23	2583	381	SNP							G	G	G	G	G	G	G	G	C	G	G	C	G	G	G	G	G	G	G	G	G	G	C	G	G	G	G	G	G	C	G	G	G	G	C	G	G	G	G	G
FLM-beta_23	2614	412	SNP							G	A	G	G	G	A	G	A	G	A	A	G	G	G	G	G	G	G	G	G	G	G	G	G	G	G	G	G	G	G	G	A	A	G	G	G	G	A	A	G
FLM-beta_23	2623	421	SNP							T	T	T	T	T	T	T	T	T	T	T	T	T	T	T	T	T	C	T	T	T	T	T	T	-	T	T	T	T	T	T	T	T	T	T	T	T	T	T	T
FLM-beta_23	2624	422	SNP							T	-	T	T	T	-	T	-	T	-	-	T	T	T	T	T	T	G	T	T	T	T	T	T	-	T	T	T	T	T	T	-	-	T	T	T	T	-	-	T
FLM-beta_23	2624	422	INDEL_DEL_2624_2624							T	-	T	T	T	-	T	-	T	-	-	T	T	T	T	T	T	G	T	T	T	T	T	T	-	T	T	T	T	T	T	-	-	T	T	T	T	-	-	T
FLM-beta_23	2625	423	SNP							C	C	C	C	C	C	C	C	C	C	C	C	C	C	C	C	C	T	C	C	C	C	C	C	-	C	C	C	C	C	C	C	C	C	C	C	C	C	C	C
FLM-beta_23	2628	426	SNP							G	G	G	G	G	G	G	G	G	G	G	G	G	G	G	G	G	T	T	G	G	G	G	G	-	G	G	G	G	G	G	G	G	G	G	G	G	G	G	G
FLM-beta_23	2639	437	INDEL_DEL_2639_2640							TT	T-	TT	TT	TT	T-	T-	T-	TT	TT	T-	TT	TT	TT	TT	TT	TT	--	--	TT	TT	TT	TT	TT	--	TT	TT	TT	TT	TT	TT	TT	T-	TT	TT	TT	TT	T-	TT	TT
FLM-beta_23	2640	438	INDEL_DEL_2640_2641							TT	--	TT	TT	TT	--	--	--	TT	TT	--	TT	TT	T-	TT	TT	TT	--	--	TT	T-	T-	TT	TT	--	TT	TT	TT	TT	TT	TT	TT	--	TT	TT	TT	TT	--	TT	TT
FLM-beta_23	2641	439	INDEL_DEL_2641_2641							T	-	T	T	T	-	-	-	T	T	-	T	T	-	T	T	T	-	-	T	-	-	T	T	-	T	T	T	T	T	T	T	-	T	T	T	T	-	T	T
FLM-beta_23	2666	464	SNP							C	C	C	C	C	C	C	C	T	C	C	T	C	T	T	T	T	C	C	C	C	C	T	C	C	C	C	C	T	T	C	C	C	C	T	C	C	C	C	C
FLM-beta_23	2765	563	SNP							C	C	C	C	C	C	C	C	G	C	C	G	C	G	G	G	G	C	C	C	C	C	G	C	C	C	C	C	G	G	C	C	C	C	G	C	C	C	C	C
FLM-beta_23	2839	637	SNP							A	A	A	A	A	A	A	A	C	A	A	C	A	C	C	C	C	A	A	A	A	A	C	A	A	A	A	A	C	C	A	A	A	A	C	A	A	A	A	A
FLM-beta_23	3079	877	SNP							A	A	A	A	A	A	A	A	A	A	A	A	A	A	A	A	A	A	A	A	A	A	A	A	A	A	A	A	A	A	A	A	A	A	A	A	A	T	A	A
FLM-beta_23	3097	895	SNP							C	C	C	C	C	C	C	C	C	C	C	C	C	C	C	C	C	T	T	C	T	T	C	T	T	C	C	T	C	C	C	C	C	C	C	C	C	C	C	C
FLM-beta_23	3145	943	SNP							C	C	C	C	C	C	C	C	C	C	C	C	C	C	C	C	C	C	C	C	C	C	C	C	C	C	C	C	C	C	C	C	C	C	C	C	C	C	C	C
FLM-beta_23	3288	1086	SNP							A	G	A	A	A	G	A	G	A	G	G	A	A	A	A	A	A	A	A	A	A	A	A	A	A	A	A	A	A	A	A	G	G	A	A	A	A	G	G	A
FLM-beta_23	3332	1130	SNP							A	A	A	G	A	A	A	A	A	A	A	A	G	A	A	A	A	A	A	G	A	A	A	A	A	G	G	A	A	A	G	A	A	G	A	G	G	A	A	A
FLM-beta_23	3503	1301	INDEL_DEL_3503_3503							-	-	-	C	-	-	-	-	-	-	-	-	C	-	-	-	-	-	-	-	-	-	-	-	-	-	-	-	-	-	-	-	-	-	-	-	-	-	-	-
FLM-beta_23	3505	1303	INDEL_DEL_3505_3505							T	T	T	T	T	T	T	T	T	T	T	T	T	-	-	T	-	T	T	T	T	T	T	T	T	T	T	T	-	T	T	T	T	T	T	T	T	T	T	T
FLM-beta_23	3589	1387	SNP							G	C	C	C	C	C	C	C	C	C	C	C	C	C	C	C	C	C	C	C	C	C	C	C	C	C	C	C	C	C	C	C	C	C	C	C	C	C	C	C
FLM-beta_23	3663	1461	INDEL_DEL_3663_3664							--	--	--	--	--	--	--	--	AA	--	--	AA	--	AA	AA	AA	AA	--	--	--	--	--	AA	--	--	--	--	--	AA	AA	--	--	--	--	AA	--	--	--	--	--
FLM-beta_23	3772	1570	SNP							C	C	C	C	C	C	C	C	C	C	C	C	C	A	C	C	C	C	C	C	C	C	C	C	C	C	C	C	C	C	C	C	C	C	C	C	C	C	C	C
FLM-beta_23	3901	1699	INDEL_DEL_3901_3901							-	-	-	-	-	-	-	-	A	-	-	A	-	-	-	-	-	-	-	-	-	-	A	-	-	-	-	-	-	A	-	-	-	-	A	-	-	-	-	-
FLM-beta_23	3975	1773	SNP							A	A	C	A	C	A	C	A	A	A	A	A	A	A	A	A	A	A	A	A	A	A	A	A	A	A	A	A	A	A	A	A	A	A	A	A	A	A	A	C
FLM-beta_23	4014	1812	SNP							C	G	G	G	G	G	G	G	G	G	G	G	G	G	G	G	G	G	G	G	G	G	G	G	G	G	G	G	G	G	G	G	G	G	G	G	G	G	G	G
FLM-beta_23	4026	1824	SNP							C	C	C	C	C	C	C	C	T	C	C	T	C	T	T	T	T	C	C	C	C	C	T	C	C	C	C	C	T	T	C	C	C	C	T	C	C	C	C	C
FLM-beta_23	4110	1908	SNP							G	G	G	G	G	G	G	G	G	G	G	G	G	G	G	G	G	G	G	G	G	G	G	G	G	A	G	G	G	G	G	G	G	G	G	G	G	G	G	G
FLM-beta_23	4118	1916	SNP							T	G	T	T	T	G	T	G	T	G	G	T	T	T	T	T	T	T	T	T	T	T	T	T	T	T	T	T	T	T	T	G	G	T	T	T	T	G	G	T
FLM-beta_23	4263	2061	SNP							T	T	T	T	T	T	T	T	C	T	T	C	T	C	C	C	C	T	T	T	T	T	C	T	T	T	T	T	C	C	T	T	T	T	C	T	T	T	T	T
FLM-beta_23	4324	2122	SNP							G	G	G	C	G	G	G	G	G	G	G	G	C	G	G	G	G	G	G	G	G	G	G	G	G	G	G	G	G	G	G	G	G	G	G	G	G	G	G	G
FLM-beta_23	4360	2158	SNP							G	G	G	G	G	G	G	G	G	G	G	G	G	G	G	G	G	C	C	G	C	C	G	C	-	G	G	C	G	G	G	G	G	G	G	G	G	G	G	G
FLM-beta_23	4550	2348	INDEL_DEL_4550_4551							--	--	--	TT	--	--	--	--	--	--	--	--	TT	--	--	--	--	--	--	--	--	--	--	--	--	--	--	--	--	--	--	--	--	--	--	--	TT	--	--	--
FLM-beta_23	4682	2480	INDEL_DEL_4682_4682							C	C	C	C	C	C	C	C	C	C	C	C	C	C	C	C	C	C	C	C	C	C	C	C	-	C	-	C	C	C	C	C	C	C	C	C	C	C	C	C
FLM-beta_23	4962	2760	SNP							G	G	G	G	G	G	G	G	G	G	G	G	G	G	G	G	G	G	G	G	G	G	G	G	A	G	G	G	G	G	G	G	G	G	G	G	G	G	G	G
FLM-beta_23	4988	2786	SNP							G	G	G	-	G	G	G	G	G	G	G	G	-	G	G	G	G	G	G	T	T	G	G	-	G	G	G	T	G	G	G	G	G	G	G	-	-	G	G	G
FLM-beta_23	5049	2847	SNP							A	A	A	T	A	A	A	A	A	A	A	A	T	A	A	A	A	A	A	A	A	A	A	A	A	A	A	A	A	A	A	A	A	A	A	A	A	A	A	A
FLM-beta_23	5142	2940	SNP							A	A	A	A	A	A	A	A	A	A	A	A	A	A	A	A	A	A	A	A	A	A	A	A	A	A	A	A	A	A	A	A	A	A	A	T	A	A	A	A
FLM-beta_23	5237	3035	INDEL_DEL_5237_5237							-	-	-	-	-	-	-	-	-	-	-	-	-	-	-	-	-	-	-	-	-	-	-	-	-	-	-	-	-	-	-	-	-	-	A	-	-	-	-	-
FLM-beta_23	5245	3043	SNP							T	T	T	T	T	T	T	T	T	T	T	T	T	T	T	T	T	T	T	T	T	T	T	T	T	T	T	T	T	T	T	T	T	T	T	T	T	T	T	T
FLM-beta_23	5248	3046	INDEL_DEL_5248_5249							--	--	T-	--	T-	--	TT	--	--	--	--	--	--	--	--	--	--	--	--	--	--	--	--	--	--	--	--	--	--	--	--	--	--	--	--	--	--	T-	--	T-
FLM-beta_23	5249	3047	INDEL_DEL_5249_5249							-	-	-	-	-	-	T	-	-	-	-	-	-	-	-	-	-	-	-	-	-	-	-	-	-	-	-	-	-	-	-	-	-	-	-	-	-	-	-	-
FLM-beta_23	5496	3294	SNP							G	G	G	G	G	G	G	G	G	G	G	G	G	A	A	A	A	G	G	G	G	G	G	G	G	G	G	G	A	G	G	G	G	G	G	G	G	G	G	G
FLM-beta_23	5517	3315	SNP							G	G	G	G	G	G	G	G	G	G	G	G	G	G	G	G	G	G	G	G	G	G	G	G	G	G	G	G	G	G	G	G	G	G	G	G	G	G	G	G
FLM-beta_23	5573	3371	SNP							T	T	T	T	T	T	T	T	T	T	T	T	T	T	T	T	T	T	T	T	A	T	T	-	T	T	T	T	T	T	T	T	T	T	T	T	T	T	T	T
FLM-beta_23	5614	3412	SNP							T	T	T	T	T	T	T	T	T	T	A	T	T	T	T	T	T	T	T	-	T	T	T	T	T	-	-	T	T	T	T	T	T	T	T	T	T	T	T	T
FLM-beta_23	5633	3431	INDEL_DEL_5633_5634							--	--	--	--	--	--	--	--	--	--	--	--	--	--	--	--	--	--	--	--	--	--	--	--	--	--	--	--	--	--	--	--	--	--	AT	--	--	--	--	--
FLM-beta_23	5980	3778	INDEL_DEL_5980_5980							-	-	-	-	-	-	-	-	-	-	-	-	-	-	-	-	-	-	-	-	-	-	-	-	-	-	-	-	-	-	-	-	-	-	-	-	-	-	-	-
FLM-beta_23	6126	3924	SNP							T	T	T	T	T	T	T	T	T	T	T	T	T	C	C	C	C	T	T	T	T	T	T	T	T	T	T	T	C	T	T	T	T	T	T	T	T	T	T	T
FLM-beta_23	6166	3964	SNP							T	T	A	T	A	T	A	T	T	T	T	T	T	T	T	T	T	T	T	T	T	T	T	T	T	T	T	T	T	T	T	T	T	T	T	T	T	A	T	A
FLM-beta_23	6184	3982	SNP							A	A	C	A	C	A	C	A	A	A	A	A	A	C	C	C	C	A	A	A	A	A	A	A	A	A	A	A	C	A	A	A	A	A	A	A	A	C	A	C
FLM-beta_23	6185	3983	SNP							A	C	A	C	A	C	A	C	A	C	C	A	C	A	A	A	A	C	C	C	C	A	A	C	C	C	C	C	A	A	A	C	C	A	A	C	C	A	C	A
FLM-beta_23	6186	3984	SNP							A	A	C	A	C	A	C	A	T	A	A	T	A	A	A	A	A	A	A	A	A	A	T	A	A	A	A	A	A	T	A	A	A	A	T	A	A	C	A	C
FLM-beta_23	6352	4150	SNP							G	G	G	G	G	G	G	G	G	G	G	G	G	A	A	A	A	G	G	G	G	G	G	G	G	G	G	G	A	G	G	G	G	G	G	G	G	G	G	G
FLM-beta_23	6374	4172	INDEL_DEL_6374_6374							T	T	T	T	T	T	T	T	T	T	T	T	T	T	T	T	-	T	T	T	T	T	T	T	T	T	T	T	-	T	T	T	T	T	T	T	T	T	T	T
FLM-beta_23	6455	4253	SNP							A	A	A	A	A	A	A	A	A	A	A	A	A	A	A	A	A	A	A	A	G	G	A	A	A	A	A	A	A	A	A	A	A	A	A	A	A	A	A	A
FLM-beta_23	6571	4369	INDEL_DEL_6571_6571							T	T	T	T	T	T	T	T	T	T	T	T	T	T	T	T	T	T	T	T	T	T	T	T	T	-	T	T	T	T	T	T	T	T	T	T	T	T	T	T
FLM-beta_23	6656	4454	INDEL_DEL_6656_6656							T	T	T	T	T	T	T	T	T	T	T	T	T	T	T	T	T	T	-	T	T	T	T	T	T	T	T	T	T	T	T	T	T	T	T	T	T	T	T	T
FLM-beta_23	6658	4456	SNP							T	T	T	T	T	T	T	T	T	T	C	T	T	T	T	T	T	T	T	T	T	T	T	T	T	T	T	T	T	T	T	T	T	T	T	T	T	T	T	T
FLM-beta_23	6667	4465	SNP							T	T	T	T	T	T	T	T	T	T	T	T	T	T	T	T	T	T	T	T	T	T	T	T	T	T	T	T	T	T	T	T	T	A	T	T	T	T	T	T
FLM-beta_23	6668	4466	INDEL_DEL_6668_6668							T	T	T	T	T	T	T	T	T	T	T	T	T	T	T	T	T	T	T	T	T	T	T	T	T	T	T	T	T	T	T	-	T	T	T	T	T	T	T	T
FLM-beta_23	6681	4479	INDEL_DEL_6681_6681							T	T	-	-	T	T	T	T	T	T	-	T	-	T	T	T	T	T	-	T	T	-	T	T	T	T	T	-	T	T	T	T	-	T	T	T	-	T	-	T
FLM-beta_23	6826	4624	INDEL_DEL_6826_6827							AT	AT	AT	AT	AT	AT	AT	AT	AT	AT	AT	AT	AT	AT	AT	AT	AT	--	AT	AT	AT	AT	AT	AT	AT	AT	AT	AT	AT	AT	AT	AT	AT	AT	AT	AT	AT	AT	AT	AT
FLM-beta_23	6830	4628	SNP							G	G	G	G	G	G	G	G	G	G	G	G	G	A	A	A	A	G	G	G	G	G	G	G	G	G	G	G	A	G	G	G	G	G	G	G	G	G	G	G
FLM_beta2_15	49	-2153	SNP							A	A	C	C	C	A	C	A	A	A	A	A	C	A	A	A	A	C	C	A	C	C	A	C	C	C	C	C	A	A	A	A	A	A	A	C	C	A	A	C
FLM_beta2_15	85	-2117	SNP							T	T	T	T	T	T	T	T	T	T	T	T	T	T	T	T	T	T	T	T	T	T	T	T	T	T	T	T	T	T	T	T	T	T	T	T	T	T	T	T
FLM_beta2_15	111	-2091	SNP							C	C	C	C	C	C	C	C	C	C	C	C	C	C	C	C	C	C	C	G	C	C	C	C	C	C	C	C	C	C	C	C	C	C	C	C	C	C	C	C
FLM_beta2_15	119	-2083	SNP							T	T	G	G	G	T	G	T	T	T	T	T	G	T	T	T	T	G	G	T	G	G	T	G	G	G	G	G	T	T	T	T	T	T	T	G	G	T	T	G
FLM_beta2_15	183	-2019	SNP							A	G	A	A	A	G	A	G	A	G	G	A	A	A	A	A	A	A	A	A	A	A	A	A	A	A	A	A	A	A	A	G	G	A	A	A	A	G	G	A
FLM_beta2_15	202	-2000	SNP							A	C	C	C	C	C	C	C	C	C	C	C	C	A	A	A	A	C	C	C	C	C	C	C	C	C	C	C	A	C	C	C	C	C	C	C	C	C	C	C
FLM_beta2_15	216	-1986	SNP							G	A	A	A	A	A	A	A	A	A	A	A	A	G	G	G	G	A	A	A	A	A	A	A	A	A	A	A	G	A	A	A	A	A	A	A	A	A	A	A
FLM_beta2_15	222	-1980	SNP							G	A	A	A	A	A	A	A	A	A	A	A	A	G	G	G	G	A	A	A	A	A	A	A	A	A	A	A	G	A	A	A	A	A	A	A	A	A	A	A
FLM_beta2_15	264	-1938	SNP							C	C	C	C	C	C	C	C	C	C	C	C	C	T	T	T	T	C	C	C	C	C	C	C	C	C	C	C	T	C	C	C	C	C	C	C	C	C	C	C
FLM_beta2_15	374	-1828	INDEL_DEL_374_374							T	T	T	T	T	T	T	T	T	T	T	T	T	T	T	T	T	T	T	T	T	T	T	T	T	T	-	T	T	T	T	T	T	T	T	T	T	T	T	T
FLM_beta2_15	417	-1785	SNP							G	G	G	G	G	G	G	G	G	G	G	G	G	G	G	G	G	C	C	G	C	C	G	C	G	G	G	C	G	G	G	G	G	G	G	G	G	G	G	G
FLM_beta2_15	453	-1749	SNP							T	G	G	G	G	G	G	G	G	G	G	G	G	G	G	G	G	G	G	G	G	G	G	G	G	G	G	G	G	G	G	G	G	G	G	G	G	G	G	G
FLM_beta2_15	469	-1733	SNP							C	A	C	C	C	A	C	A	C	A	A	C	C	C	C	C	C	C	C	C	C	C	C	C	C	C	C	C	C	C	C	A	A	C	C	C	C	A	A	C
FLM_beta2_15	547	-1655	SNP							C	C	C	C	C	C	C	C	C	C	C	C	C	C	C	C	C	C	C	C	C	C	C	C	C	C	C	C	C	C	C	C	C	C	G	C	C	C	C	C
FLM_beta2_15	628	-1574	SNP							G	A	A	A	A	A	A	A	A	A	A	A	A	A	A	A	A	A	A	A	A	A	A	A	A	A	A	A	A	A	A	A	A	A	A	A	A	A	A	A
FLM_beta2_15	650	-1552	SNP							G	A	A	A	A	A	A	A	G	A	A	G	A	G	G	G	G	A	A	A	A	A	G	A	A	A	A	A	G	G	A	A	A	A	G	A	A	A	A	A
FLM_beta2_15	662	-1540	SNP							A	A	T	T	T	A	T	A	T	A	A	T	T	T	T	C	T	A	A	A	A	A	T	A	T	T	A	A	T	T	A	A	A	A	T	T	T	A	A	T
FLM_beta2_15	667	-1535	SNP							T	T	T	T	T	T	T	T	T	T	T	T	T	-	G	-	-	T	T	T	T	T	T	T	T	T	T	T	-	T	T	T	T	T	T	T	T	T	T	T
FLM_beta2_15	736	-1466	INDEL_DEL_736_736							A	A	A	A	A	A	A	A	A	A	A	A	A	-	-	-	-	A	A	A	A	A	A	A	A	A	A	A	-	A	A	A	A	A	A	A	A	A	A	A
FLM_beta2_15	755	-1447	SNP							G	G	G	G	G	G	G	G	G	G	G	G	G	G	G	G	A	G	G	G	G	G	G	G	G	G	G	G	G	G	G	G	G	G	G	G	G	G	G	G
FLM_beta2_15	781	-1421	SNP							T	T	T	T	T	T	T	T	T	T	T	T	T	T	T	T	T	T	T	T	T	T	T	T	T	T	T	C	T	T	T	T	T	T	T	T	T	T	T	T
FLM_beta2_15	832	-1370	INDEL_DEL_832_832							A	A	A	-	-	A	-	A	A	A	A	A	-	A	A	A	A	A	A	A	A	A	A	A	A	-	-	A	A	A	A	A	A	A	A	-	-	A	A	-
FLM_beta2_15	833	-1369	SNP							A	A	T	T	T	A	T	A	A	A	A	A	T	A	A	A	A	A	A	A	A	A	A	A	A	T	T	A	A	A	A	A	A	A	A	T	T	A	A	T
FLM_beta2_15	891	-1311	SNP							G	G	C	C	C	G	C	G	G	G	G	G	C	G	G	G	G	G	G	G	G	G	G	G	G	C	C	G	G	G	G	G	G	G	G	C	C	G	G	C
FLM_beta2_15	909	-1293	SNP							T	T	C	C	C	T	C	T	T	T	T	T	C	T	T	T	T	T	T	T	T	T	T	T	T	C	C	T	T	T	T	T	T	T	T	C	C	T	T	C
FLM_beta2_15	958	-1244	SNP							T	T	G	C	G	T	G	T	T	T	T	T	C	T	T	T	T	T	T	T	T	T	T	T	T	C	C	T	T	T	T	T	T	T	T	C	C	T	T	G
FLM_beta2_15	975	-1227	INDEL_DEL_975_976							GA	GA	GA	GA	GA	GA	GA	GA	GA	GA	GA	GA	GA	GA	GA	GA	GA	GA	GA	GA	GA	GA	GA	GA	GA	GA	GA	--	GA	GA	GA	GA	GA	GA	GA	GA	GA	GA	GA	GA
FLM_beta2_15	1007	-1195	INDEL_DEL_1007_1008							T-	T-	TT	TT	--	T-	TT	TT	TT	TT	T-	TT	TT	TT	TT	TT	TT	TT	TT	TT	TT	TT	TT	TT	TT	T-	TT	TT	TT	TT	TT	TT	T-	TT	TT	T-	T-	T-	TT	--
FLM_beta2_15	1008	-1194	INDEL_DEL_1008_1008							-	-	T	T	-	-	T	T	T	T	-	T	T	T	T	T	T	T	T	T	T	T	T	T	T	-	T	T	T	T	T	T	-	T	T	-	-	-	T	-
FLM_beta2_15	1150	-1052	SNP							A	T	A	A	A	T	A	T	A	T	T	A	A	A	A	A	A	A	A	A	A	A	A	A	A	A	A	A	A	A	A	T	T	A	A	A	A	T	T	A
FLM_beta2_15	1191	-1011	SNP							G	G	G	G	G	G	G	G	G	G	G	G	G	G	G	G	G	G	G	G	G	G	G	G	G	C	G	G	G	G	G	G	G	G	G	G	G	G	G	G
FLM_beta2_15	1223	-979	SNP							A	A	A	A	A	A	A	A	A	A	A	A	A	A	A	A	A	A	A	A	A	A	A	A	A	A	A	A	A	A	G	A	A	G	A	A	A	A	A	A
FLM_beta2_15	1228	-974	SNP							A	A	A	A	A	A	A	A	A	A	A	A	A	A	A	A	A	A	A	G	A	A	A	A	A	A	A	A	A	A	A	A	A	A	A	A	A	A	A	A
FLM_beta2_15	1321	-881	SNP							G	G	G	G	G	G	G	G	G	G	G	G	G	G	G	G	G	G	G	G	G	G	G	G	G	G	G	G	G	G	T	G	G	T	G	G	G	G	G	G
FLM_beta2_15	1354	-848	SNP							G	G	G	G	G	G	G	G	G	G	G	G	G	G	G	G	G	T	T	G	T	T	G	T	T	G	G	T	G	G	G	G	G	G	G	G	G	G	G	G
FLM_beta2_15	1364	-838	SNP							A	A	A	A	A	A	A	A	G	A	A	G	A	A	A	A	A	A	A	A	A	A	G	A	A	A	A	A	A	G	A	A	A	A	G	A	A	A	A	A
FLM_beta2_15	1404	-798	SNP							G	G	G	G	G	G	G	G	G	G	G	G	G	G	G	G	G	G	G	G	T	T	G	T	T	G	G	T	G	G	G	G	G	G	G	G	G	G	G	G
FLM_beta2_15	1656	-546	SNP							G	G	G	A	G	G	G	G	G	G	G	G	A	G	G	G	G	G	G	G	G	G	G	G	G	G	G	G	G	G	G	G	G	G	G	G	G	G	G	G
FLM_beta2_15	1734	-468	SNP							C	C	C	C	C	C	C	C	C	C	C	C	C	C	C	C	C	C	C	C	C	C	C	C	C	C	C	C	C	C	T	C	C	T	C	C	C	C	C	C
FLM_beta2_15	1832	-370	SNP							C	T	C	C	C	T	C	T	C	T	T	C	C	C	C	C	C	C	C	C	C	C	C	C	C	C	C	C	C	C	C	T	T	C	C	C	C	T	T	C
FLM_beta2_15	1861	-341	SNP							A	A	A	A	A	A	A	A	A	A	A	A	A	A	G	A	A	A	A	A	A	A	A	A	A	A	A	A	A	A	A	A	A	A	A	A	A	A	A	A
FLM_beta2_15	1986	-216	INDEL_DEL_1986_1986							T	T	T	-	T	T	T	T	T	T	T	T	-	T	T	T	T	-	-	T	-	-	T	-	-	-	T	-	T	T	T	T	T	T	T	T	T	T	T	T
FLM_beta2_15	1994	-208	SNP							A	A	A	A	A	A	A	A	A	A	A	A	A	A	A	A	A	A	A	A	A	A	A	A	A	A	A	A	A	A	A	A	T	A	A	A	A	A	A	A
FLM_beta2_15	2030	-172	INDEL_DEL_2030_2030							A	-	-	-	-	-	-	-	-	-	-	-	-	-	-	-	-	-	-	-	-	-	-	-	-	-	-	-	-	-	-	-	-	-	-	-	-	-	-	-
FLM_beta2_15	2042	-160	SNP							C	C	T	C	T	C	T	C	C	C	C	C	C	C	C	C	C	C	C	C	C	C	C	C	C	C	C	C	C	C	C	C	C	C	C	C	C	C	C	T
FLM_beta2_15	2100	-102	SNP							G	A	A	A	A	A	A	A	A	A	A	A	A	G	G	G	G	A	A	A	A	A	A	A	A	A	A	A	G	A	A	A	A	A	A	A	A	A	A	A
FLM_beta2_15	2103	-99	SNP							T	A	A	A	A	A	A	A	A	A	A	A	A	T	T	T	T	A	A	A	A	A	A	A	A	A	A	A	T	A	A	A	A	A	A	A	A	A	A	A
FLM_beta2_15	2109	-93	SNP							A	A	A	C	A	A	A	A	A	A	A	A	C	A	A	A	A	C	C	C	C	C	A	C	C	C	C	C	A	A	C	A	A	C	A	C	C	A	A	A
FLM_beta2_15	2197	-5	SNP							A	A	A	A	A	A	A	A	A	A	A	A	A	A	A	A	A	A	A	C	A	A	A	A	A	A	C	A	A	A	A	A	A	A	A	C	C	A	A	A
FLM_beta2_15	2373	171	SNP							C	C	C	C	C	C	C	C	C	C	C	C	C	C	C	C	C	C	C	C	C	C	C	C	C	C	C	C	C	C	C	C	C	C	C	C	C	C	C	C
FLM_beta2_15	2386	184	SNP							G	G	G	G	G	G	G	G	G	G	G	G	G	G	G	G	G	G	G	G	G	G	G	G	G	G	G	G	G	G	G	G	G	G	G	G	G	G	G	G
FLM_beta2_15	2394	192	SNP							A	A	T	T	T	A	T	A	A	A	A	A	T	A	A	A	A	T	T	A	T	T	A	T	T	T	T	T	A	A	A	A	A	A	A	A	A	A	A	T
FLM_beta2_15	2488	286	SNP							G	G	G	G	G	G	G	G	G	G	G	G	G	G	G	G	G	T	T	G	T	T	G	T	T	G	G	T	G	G	G	G	G	G	G	G	G	G	G	G
FLM_beta2_15	2535	333	SNP							A	A	A	A	A	A	A	A	A	A	A	A	A	A	A	A	A	A	A	A	A	A	A	G	A	A	A	G	A	A	A	A	A	A	A	A	A	A	A	A
FLM_beta2_15	2554	352	SNP							T	T	T	T	T	T	T	T	T	T	T	T	T	T	T	T	T	T	T	G	T	T	T	T	T	T	T	T	T	T	T	T	T	T	T	T	T	T	T	T
FLM_beta2_15	2583	381	SNP							G	G	G	G	G	G	G	G	C	G	G	C	G	G	G	G	G	G	G	G	G	G	C	G	G	G	G	G	G	C	G	G	G	G	C	G	G	G	G	G
FLM_beta2_15	2614	412	SNP							G	A	G	G	G	A	G	A	G	A	A	G	G	G	G	G	G	G	G	G	G	G	G	G	G	G	G	G	G	G	G	A	A	G	G	G	G	A	A	G
FLM_beta2_15	2623	421	SNP							T	T	T	T	T	T	T	T	T	T	T	T	T	T	T	T	T	C	T	T	T	T	T	T	-	T	T	T	T	T	T	T	T	T	T	T	T	T	T	T
FLM_beta2_15	2624	422	SNP							T	-	T	T	T	-	T	-	T	-	-	T	T	T	T	T	T	G	T	T	T	T	T	T	-	T	T	T	T	T	T	-	-	T	T	T	T	-	-	T
FLM_beta2_15	2624	422	INDEL_DEL_2624_2624							T	-	T	T	T	-	T	-	T	-	-	T	T	T	T	T	T	G	T	T	T	T	T	T	-	T	T	T	T	T	T	-	-	T	T	T	T	-	-	T
FLM_beta2_15	2625	423	SNP							C	C	C	C	C	C	C	C	C	C	C	C	C	C	C	C	C	T	C	C	C	C	C	C	-	C	C	C	C	C	C	C	C	C	C	C	C	C	C	C
FLM_beta2_15	2628	426	SNP							G	G	G	G	G	G	G	G	G	G	G	G	G	G	G	G	G	T	T	G	G	G	G	G	-	G	G	G	G	G	G	G	G	G	G	G	G	G	G	G
FLM_beta2_15	2639	437	INDEL_DEL_2639_2640							TT	T-	TT	TT	TT	T-	T-	T-	TT	TT	T-	TT	TT	TT	TT	TT	TT	--	--	TT	TT	TT	TT	TT	--	TT	TT	TT	TT	TT	TT	TT	T-	TT	TT	TT	TT	T-	TT	TT
FLM_beta2_15	2640	438	INDEL_DEL_2640_2641							TT	--	TT	TT	TT	--	--	--	TT	TT	--	TT	TT	T-	TT	TT	TT	--	--	TT	T-	T-	TT	TT	--	TT	TT	TT	TT	TT	TT	TT	--	TT	TT	TT	TT	--	TT	TT
FLM_beta2_15	2641	439	INDEL_DEL_2641_2641							T	-	T	T	T	-	-	-	T	T	-	T	T	-	T	T	T	-	-	T	-	-	T	T	-	T	T	T	T	T	T	T	-	T	T	T	T	-	T	T
FLM_beta2_15	2666	464	SNP							C	C	C	C	C	C	C	C	T	C	C	T	C	T	T	T	T	C	C	C	C	C	T	C	C	C	C	C	T	T	C	C	C	C	T	C	C	C	C	C
FLM_beta2_15	2765	563	SNP							C	C	C	C	C	C	C	C	G	C	C	G	C	G	G	G	G	C	C	C	C	C	G	C	C	C	C	C	G	G	C	C	C	C	G	C	C	C	C	C
FLM_beta2_15	2839	637	SNP							A	A	A	A	A	A	A	A	C	A	A	C	A	C	C	C	C	A	A	A	A	A	C	A	A	A	A	A	C	C	A	A	A	A	C	A	A	A	A	A
FLM_beta2_15	3079	877	SNP							A	A	A	A	A	A	A	A	A	A	A	A	A	A	A	A	A	A	A	A	A	A	A	A	A	A	A	A	A	A	A	A	A	A	A	A	A	T	A	A
FLM_beta2_15	3097	895	SNP							C	C	C	C	C	C	C	C	C	C	C	C	C	C	C	C	C	T	T	C	T	T	C	T	T	C	C	T	C	C	C	C	C	C	C	C	C	C	C	C
FLM_beta2_15	3145	943	SNP							C	C	C	C	C	C	C	C	C	C	C	C	C	C	C	C	C	C	C	C	C	C	C	C	C	C	C	C	C	C	C	C	C	C	C	C	C	C	C	C
FLM_beta2_15	3288	1086	SNP							A	G	A	A	A	G	A	G	A	G	G	A	A	A	A	A	A	A	A	A	A	A	A	A	A	A	A	A	A	A	A	G	G	A	A	A	A	G	G	A
FLM_beta2_15	3332	1130	SNP							A	A	A	G	A	A	A	A	A	A	A	A	G	A	A	A	A	A	A	G	A	A	A	A	A	G	G	A	A	A	G	A	A	G	A	G	G	A	A	A
FLM_beta2_15	3503	1301	INDEL_DEL_3503_3503							-	-	-	C	-	-	-	-	-	-	-	-	C	-	-	-	-	-	-	-	-	-	-	-	-	-	-	-	-	-	-	-	-	-	-	-	-	-	-	-
FLM_beta2_15	3505	1303	INDEL_DEL_3505_3505							T	T	T	T	T	T	T	T	T	T	T	T	T	-	-	T	-	T	T	T	T	T	T	T	T	T	T	T	-	T	T	T	T	T	T	T	T	T	T	T
FLM_beta2_15	3589	1387	SNP							G	C	C	C	C	C	C	C	C	C	C	C	C	C	C	C	C	C	C	C	C	C	C	C	C	C	C	C	C	C	C	C	C	C	C	C	C	C	C	C
FLM_beta2_15	3663	1461	INDEL_DEL_3663_3664							--	--	--	--	--	--	--	--	AA	--	--	AA	--	AA	AA	AA	AA	--	--	--	--	--	AA	--	--	--	--	--	AA	AA	--	--	--	--	AA	--	--	--	--	--
FLM_beta2_15	3772	1570	SNP							C	C	C	C	C	C	C	C	C	C	C	C	C	A	C	C	C	C	C	C	C	C	C	C	C	C	C	C	C	C	C	C	C	C	C	C	C	C	C	C
FLM_beta2_15	3901	1699	INDEL_DEL_3901_3901							-	-	-	-	-	-	-	-	A	-	-	A	-	-	-	-	-	-	-	-	-	-	A	-	-	-	-	-	-	A	-	-	-	-	A	-	-	-	-	-
FLM_beta2_15	3975	1773	SNP							A	A	C	A	C	A	C	A	A	A	A	A	A	A	A	A	A	A	A	A	A	A	A	A	A	A	A	A	A	A	A	A	A	A	A	A	A	A	A	C
FLM_beta2_15	4014	1812	SNP							C	G	G	G	G	G	G	G	G	G	G	G	G	G	G	G	G	G	G	G	G	G	G	G	G	G	G	G	G	G	G	G	G	G	G	G	G	G	G	G
FLM_beta2_15	4026	1824	SNP							C	C	C	C	C	C	C	C	T	C	C	T	C	T	T	T	T	C	C	C	C	C	T	C	C	C	C	C	T	T	C	C	C	C	T	C	C	C	C	C
FLM_beta2_15	4110	1908	SNP							G	G	G	G	G	G	G	G	G	G	G	G	G	G	G	G	G	G	G	G	G	G	G	G	G	A	G	G	G	G	G	G	G	G	G	G	G	G	G	G
FLM_beta2_15	4118	1916	SNP							T	G	T	T	T	G	T	G	T	G	G	T	T	T	T	T	T	T	T	T	T	T	T	T	T	T	T	T	T	T	T	G	G	T	T	T	T	G	G	T
FLM_beta2_15	4263	2061	SNP							T	T	T	T	T	T	T	T	C	T	T	C	T	C	C	C	C	T	T	T	T	T	C	T	T	T	T	T	C	C	T	T	T	T	C	T	T	T	T	T
FLM_beta2_15	4324	2122	SNP							G	G	G	C	G	G	G	G	G	G	G	G	C	G	G	G	G	G	G	G	G	G	G	G	G	G	G	G	G	G	G	G	G	G	G	G	G	G	G	G
FLM_beta2_15	4360	2158	SNP							G	G	G	G	G	G	G	G	G	G	G	G	G	G	G	G	G	C	C	G	C	C	G	C	-	G	G	C	G	G	G	G	G	G	G	G	G	G	G	G
FLM_beta2_15	4550	2348	INDEL_DEL_4550_4551							--	--	--	TT	--	--	--	--	--	--	--	--	TT	--	--	--	--	--	--	--	--	--	--	--	--	--	--	--	--	--	--	--	--	--	--	--	TT	--	--	--
FLM_beta2_15	4682	2480	INDEL_DEL_4682_4682							C	C	C	C	C	C	C	C	C	C	C	C	C	C	C	C	C	C	C	C	C	C	C	C	-	C	-	C	C	C	C	C	C	C	C	C	C	C	C	C
FLM_beta2_15	4962	2760	SNP							G	G	G	G	G	G	G	G	G	G	G	G	G	G	G	G	G	G	G	G	G	G	G	G	A	G	G	G	G	G	G	G	G	G	G	G	G	G	G	G
FLM_beta2_15	4988	2786	SNP							G	G	G	-	G	G	G	G	G	G	G	G	-	G	G	G	G	G	G	T	T	G	G	-	G	G	G	T	G	G	G	G	G	G	G	-	-	G	G	G
FLM_beta2_15	5049	2847	SNP							A	A	A	T	A	A	A	A	A	A	A	A	T	A	A	A	A	A	A	A	A	A	A	A	A	A	A	A	A	A	A	A	A	A	A	A	A	A	A	A
FLM_beta2_15	5142	2940	SNP							A	A	A	A	A	A	A	A	A	A	A	A	A	A	A	A	A	A	A	A	A	A	A	A	A	A	A	A	A	A	A	A	A	A	A	T	A	A	A	A
FLM_beta2_15	5237	3035	INDEL_DEL_5237_5237							-	-	-	-	-	-	-	-	-	-	-	-	-	-	-	-	-	-	-	-	-	-	-	-	-	-	-	-	-	-	-	-	-	-	A	-	-	-	-	-
FLM_beta2_15	5245	3043	SNP							T	T	T	T	T	T	T	T	T	T	T	T	T	T	T	T	T	T	T	T	T	T	T	T	T	T	T	T	T	T	T	T	T	T	T	T	T	T	T	T
FLM_beta2_15	5248	3046	INDEL_DEL_5248_5249							--	--	T-	--	T-	--	TT	--	--	--	--	--	--	--	--	--	--	--	--	--	--	--	--	--	--	--	--	--	--	--	--	--	--	--	--	--	--	T-	--	T-
FLM_beta2_15	5249	3047	INDEL_DEL_5249_5249							-	-	-	-	-	-	T	-	-	-	-	-	-	-	-	-	-	-	-	-	-	-	-	-	-	-	-	-	-	-	-	-	-	-	-	-	-	-	-	-
FLM_beta2_15	5496	3294	SNP							G	G	G	G	G	G	G	G	G	G	G	G	G	A	A	A	A	G	G	G	G	G	G	G	G	G	G	G	A	G	G	G	G	G	G	G	G	G	G	G
FLM_beta2_15	5517	3315	SNP							G	G	G	G	G	G	G	G	G	G	G	G	G	G	G	G	G	G	G	G	G	G	G	G	G	G	G	G	G	G	G	G	G	G	G	G	G	G	G	G
FLM_beta2_15	5573	3371	SNP							T	T	T	T	T	T	T	T	T	T	T	T	T	T	T	T	T	T	T	T	A	T	T	-	T	T	T	T	T	T	T	T	T	T	T	T	T	T	T	T
FLM_beta2_15	5614	3412	SNP							T	T	T	T	T	T	T	T	T	T	A	T	T	T	T	T	T	T	T	-	T	T	T	T	T	-	-	T	T	T	T	T	T	T	T	T	T	T	T	T
FLM_beta2_15	5633	3431	INDEL_DEL_5633_5634							--	--	--	--	--	--	--	--	--	--	--	--	--	--	--	--	--	--	--	--	--	--	--	--	--	--	--	--	--	--	--	--	--	--	AT	--	--	--	--	--
FLM_beta2_15	5980	3778	INDEL_DEL_5980_5980							-	-	-	-	-	-	-	-	-	-	-	-	-	-	-	-	-	-	-	-	-	-	-	-	-	-	-	-	-	-	-	-	-	-	-	-	-	-	-	-
FLM_beta2_15	6126	3924	SNP							T	T	T	T	T	T	T	T	T	T	T	T	T	C	C	C	C	T	T	T	T	T	T	T	T	T	T	T	C	T	T	T	T	T	T	T	T	T	T	T
FLM_beta2_15	6166	3964	SNP							T	T	A	T	A	T	A	T	T	T	T	T	T	T	T	T	T	T	T	T	T	T	T	T	T	T	T	T	T	T	T	T	T	T	T	T	T	A	T	A
FLM_beta2_15	6184	3982	SNP							A	A	C	A	C	A	C	A	A	A	A	A	A	C	C	C	C	A	A	A	A	A	A	A	A	A	A	A	C	A	A	A	A	A	A	A	A	C	A	C
FLM_beta2_15	6185	3983	SNP							A	C	A	C	A	C	A	C	A	C	C	A	C	A	A	A	A	C	C	C	C	A	A	C	C	C	C	C	A	A	A	C	C	A	A	C	C	A	C	A
FLM_beta2_15	6186	3984	SNP							A	A	C	A	C	A	C	A	T	A	A	T	A	A	A	A	A	A	A	A	A	A	T	A	A	A	A	A	A	T	A	A	A	A	T	A	A	C	A	C
FLM_beta2_15	6352	4150	SNP							G	G	G	G	G	G	G	G	G	G	G	G	G	A	A	A	A	G	G	G	G	G	G	G	G	G	G	G	A	G	G	G	G	G	G	G	G	G	G	G
FLM_beta2_15	6374	4172	INDEL_DEL_6374_6374							T	T	T	T	T	T	T	T	T	T	T	T	T	T	T	T	-	T	T	T	T	T	T	T	T	T	T	T	-	T	T	T	T	T	T	T	T	T	T	T
FLM_beta2_15	6455	4253	SNP							A	A	A	A	A	A	A	A	A	A	A	A	A	A	A	A	A	A	A	A	G	G	A	A	A	A	A	A	A	A	A	A	A	A	A	A	A	A	A	A
FLM_beta2_15	6571	4369	INDEL_DEL_6571_6571							T	T	T	T	T	T	T	T	T	T	T	T	T	T	T	T	T	T	T	T	T	T	T	T	T	-	T	T	T	T	T	T	T	T	T	T	T	T	T	T
FLM_beta2_15	6656	4454	INDEL_DEL_6656_6656							T	T	T	T	T	T	T	T	T	T	T	T	T	T	T	T	T	T	-	T	T	T	T	T	T	T	T	T	T	T	T	T	T	T	T	T	T	T	T	T
FLM_beta2_15	6658	4456	SNP							T	T	T	T	T	T	T	T	T	T	C	T	T	T	T	T	T	T	T	T	T	T	T	T	T	T	T	T	T	T	T	T	T	T	T	T	T	T	T	T
FLM_beta2_15	6667	4465	SNP							T	T	T	T	T	T	T	T	T	T	T	T	T	T	T	T	T	T	T	T	T	T	T	T	T	T	T	T	T	T	T	T	T	A	T	T	T	T	T	T
FLM_beta2_15	6668	4466	INDEL_DEL_6668_6668							T	T	T	T	T	T	T	T	T	T	T	T	T	T	T	T	T	T	T	T	T	T	T	T	T	T	T	T	T	T	T	-	T	T	T	T	T	T	T	T
FLM_beta2_15	6681	4479	INDEL_DEL_6681_6681							T	T	-	-	T	T	T	T	T	T	-	T	-	T	T	T	T	T	-	T	T	-	T	T	T	T	T	-	T	T	T	T	-	T	T	T	-	T	-	T
FLM_beta2_15	6826	4624	INDEL_DEL_6826_6827							AT	AT	AT	AT	AT	AT	AT	AT	AT	AT	AT	AT	AT	AT	AT	AT	AT	--	AT	AT	AT	AT	AT	AT	AT	AT	AT	AT	AT	AT	AT	AT	AT	AT	AT	AT	AT	AT	AT	AT
FLM_beta2_15	6830	4628	SNP							G	G	G	G	G	G	G	G	G	G	G	G	G	A	A	A	A	G	G	G	G	G	G	G	G	G	G	G	A	G	G	G	G	G	G	G	G	G	G	G
DELTA_vs_BETA_23	49	-2153	SNP							A	A	C	C	C	A	C	A	A	A	A	A	C	A	A	A	A	C	C	A	C	C	A	C	C	C	C	C	A	A	A	A	A	A	A	C	C	A	A	C
DELTA_vs_BETA_23	85	-2117	SNP							T	T	T	T	T	T	T	T	T	T	T	T	T	T	T	T	T	T	T	T	T	T	T	T	T	T	T	T	T	T	T	T	T	T	T	T	T	T	T	T
DELTA_vs_BETA_23	111	-2091	SNP							C	C	C	C	C	C	C	C	C	C	C	C	C	C	C	C	C	C	C	G	C	C	C	C	C	C	C	C	C	C	C	C	C	C	C	C	C	C	C	C
DELTA_vs_BETA_23	119	-2083	SNP							T	T	G	G	G	T	G	T	T	T	T	T	G	T	T	T	T	G	G	T	G	G	T	G	G	G	G	G	T	T	T	T	T	T	T	G	G	T	T	G
DELTA_vs_BETA_23	183	-2019	SNP							A	G	A	A	A	G	A	G	A	G	G	A	A	A	A	A	A	A	A	A	A	A	A	A	A	A	A	A	A	A	A	G	G	A	A	A	A	G	G	A
DELTA_vs_BETA_23	202	-2000	SNP							A	C	C	C	C	C	C	C	C	C	C	C	C	A	A	A	A	C	C	C	C	C	C	C	C	C	C	C	A	C	C	C	C	C	C	C	C	C	C	C
DELTA_vs_BETA_23	216	-1986	SNP							G	A	A	A	A	A	A	A	A	A	A	A	A	G	G	G	G	A	A	A	A	A	A	A	A	A	A	A	G	A	A	A	A	A	A	A	A	A	A	A
DELTA_vs_BETA_23	222	-1980	SNP							G	A	A	A	A	A	A	A	A	A	A	A	A	G	G	G	G	A	A	A	A	A	A	A	A	A	A	A	G	A	A	A	A	A	A	A	A	A	A	A
DELTA_vs_BETA_23	264	-1938	SNP							C	C	C	C	C	C	C	C	C	C	C	C	C	T	T	T	T	C	C	C	C	C	C	C	C	C	C	C	T	C	C	C	C	C	C	C	C	C	C	C
DELTA_vs_BETA_23	374	-1828	INDEL_DEL_374_374							T	T	T	T	T	T	T	T	T	T	T	T	T	T	T	T	T	T	T	T	T	T	T	T	T	T	-	T	T	T	T	T	T	T	T	T	T	T	T	T
DELTA_vs_BETA_23	417	-1785	SNP							G	G	G	G	G	G	G	G	G	G	G	G	G	G	G	G	G	C	C	G	C	C	G	C	G	G	G	C	G	G	G	G	G	G	G	G	G	G	G	G
DELTA_vs_BETA_23	453	-1749	SNP							T	G	G	G	G	G	G	G	G	G	G	G	G	G	G	G	G	G	G	G	G	G	G	G	G	G	G	G	G	G	G	G	G	G	G	G	G	G	G	G
DELTA_vs_BETA_23	469	-1733	SNP							C	A	C	C	C	A	C	A	C	A	A	C	C	C	C	C	C	C	C	C	C	C	C	C	C	C	C	C	C	C	C	A	A	C	C	C	C	A	A	C
DELTA_vs_BETA_23	547	-1655	SNP							C	C	C	C	C	C	C	C	C	C	C	C	C	C	C	C	C	C	C	C	C	C	C	C	C	C	C	C	C	C	C	C	C	C	G	C	C	C	C	C
DELTA_vs_BETA_23	628	-1574	SNP							G	A	A	A	A	A	A	A	A	A	A	A	A	A	A	A	A	A	A	A	A	A	A	A	A	A	A	A	A	A	A	A	A	A	A	A	A	A	A	A
DELTA_vs_BETA_23	650	-1552	SNP							G	A	A	A	A	A	A	A	G	A	A	G	A	G	G	G	G	A	A	A	A	A	G	A	A	A	A	A	G	G	A	A	A	A	G	A	A	A	A	A
DELTA_vs_BETA_23	662	-1540	SNP							A	A	T	T	T	A	T	A	T	A	A	T	T	T	T	C	T	A	A	A	A	A	T	A	T	T	A	A	T	T	A	A	A	A	T	T	T	A	A	T
DELTA_vs_BETA_23	667	-1535	SNP							T	T	T	T	T	T	T	T	T	T	T	T	T	-	G	-	-	T	T	T	T	T	T	T	T	T	T	T	-	T	T	T	T	T	T	T	T	T	T	T
DELTA_vs_BETA_23	736	-1466	INDEL_DEL_736_736							A	A	A	A	A	A	A	A	A	A	A	A	A	-	-	-	-	A	A	A	A	A	A	A	A	A	A	A	-	A	A	A	A	A	A	A	A	A	A	A
DELTA_vs_BETA_23	755	-1447	SNP							G	G	G	G	G	G	G	G	G	G	G	G	G	G	G	G	A	G	G	G	G	G	G	G	G	G	G	G	G	G	G	G	G	G	G	G	G	G	G	G
DELTA_vs_BETA_23	781	-1421	SNP							T	T	T	T	T	T	T	T	T	T	T	T	T	T	T	T	T	T	T	T	T	T	T	T	T	T	T	C	T	T	T	T	T	T	T	T	T	T	T	T
DELTA_vs_BETA_23	832	-1370	INDEL_DEL_832_832							A	A	A	-	-	A	-	A	A	A	A	A	-	A	A	A	A	A	A	A	A	A	A	A	A	-	-	A	A	A	A	A	A	A	A	-	-	A	A	-
DELTA_vs_BETA_23	833	-1369	SNP							A	A	T	T	T	A	T	A	A	A	A	A	T	A	A	A	A	A	A	A	A	A	A	A	A	T	T	A	A	A	A	A	A	A	A	T	T	A	A	T
DELTA_vs_BETA_23	891	-1311	SNP							G	G	C	C	C	G	C	G	G	G	G	G	C	G	G	G	G	G	G	G	G	G	G	G	G	C	C	G	G	G	G	G	G	G	G	C	C	G	G	C
DELTA_vs_BETA_23	909	-1293	SNP							T	T	C	C	C	T	C	T	T	T	T	T	C	T	T	T	T	T	T	T	T	T	T	T	T	C	C	T	T	T	T	T	T	T	T	C	C	T	T	C
DELTA_vs_BETA_23	958	-1244	SNP							T	T	G	C	G	T	G	T	T	T	T	T	C	T	T	T	T	T	T	T	T	T	T	T	T	C	C	T	T	T	T	T	T	T	T	C	C	T	T	G
DELTA_vs_BETA_23	975	-1227	INDEL_DEL_975_976							GA	GA	GA	GA	GA	GA	GA	GA	GA	GA	GA	GA	GA	GA	GA	GA	GA	GA	GA	GA	GA	GA	GA	GA	GA	GA	GA	--	GA	GA	GA	GA	GA	GA	GA	GA	GA	GA	GA	GA
DELTA_vs_BETA_23	1007	-1195	INDEL_DEL_1007_1008							T-	T-	TT	TT	--	T-	TT	TT	TT	TT	T-	TT	TT	TT	TT	TT	TT	TT	TT	TT	TT	TT	TT	TT	TT	T-	TT	TT	TT	TT	TT	TT	T-	TT	TT	T-	T-	T-	TT	--
DELTA_vs_BETA_23	1008	-1194	INDEL_DEL_1008_1008							-	-	T	T	-	-	T	T	T	T	-	T	T	T	T	T	T	T	T	T	T	T	T	T	T	-	T	T	T	T	T	T	-	T	T	-	-	-	T	-
DELTA_vs_BETA_23	1150	-1052	SNP							A	T	A	A	A	T	A	T	A	T	T	A	A	A	A	A	A	A	A	A	A	A	A	A	A	A	A	A	A	A	A	T	T	A	A	A	A	T	T	A
DELTA_vs_BETA_23	1191	-1011	SNP							G	G	G	G	G	G	G	G	G	G	G	G	G	G	G	G	G	G	G	G	G	G	G	G	G	C	G	G	G	G	G	G	G	G	G	G	G	G	G	G
DELTA_vs_BETA_23	1223	-979	SNP							A	A	A	A	A	A	A	A	A	A	A	A	A	A	A	A	A	A	A	A	A	A	A	A	A	A	A	A	A	A	G	A	A	G	A	A	A	A	A	A
DELTA_vs_BETA_23	1228	-974	SNP							A	A	A	A	A	A	A	A	A	A	A	A	A	A	A	A	A	A	A	G	A	A	A	A	A	A	A	A	A	A	A	A	A	A	A	A	A	A	A	A
DELTA_vs_BETA_23	1321	-881	SNP							G	G	G	G	G	G	G	G	G	G	G	G	G	G	G	G	G	G	G	G	G	G	G	G	G	G	G	G	G	G	T	G	G	T	G	G	G	G	G	G
DELTA_vs_BETA_23	1354	-848	SNP							G	G	G	G	G	G	G	G	G	G	G	G	G	G	G	G	G	T	T	G	T	T	G	T	T	G	G	T	G	G	G	G	G	G	G	G	G	G	G	G
DELTA_vs_BETA_23	1364	-838	SNP							A	A	A	A	A	A	A	A	G	A	A	G	A	A	A	A	A	A	A	A	A	A	G	A	A	A	A	A	A	G	A	A	A	A	G	A	A	A	A	A
DELTA_vs_BETA_23	1404	-798	SNP							G	G	G	G	G	G	G	G	G	G	G	G	G	G	G	G	G	G	G	G	T	T	G	T	T	G	G	T	G	G	G	G	G	G	G	G	G	G	G	G
DELTA_vs_BETA_23	1656	-546	SNP							G	G	G	A	G	G	G	G	G	G	G	G	A	G	G	G	G	G	G	G	G	G	G	G	G	G	G	G	G	G	G	G	G	G	G	G	G	G	G	G
DELTA_vs_BETA_23	1734	-468	SNP							C	C	C	C	C	C	C	C	C	C	C	C	C	C	C	C	C	C	C	C	C	C	C	C	C	C	C	C	C	C	T	C	C	T	C	C	C	C	C	C
DELTA_vs_BETA_23	1832	-370	SNP							C	T	C	C	C	T	C	T	C	T	T	C	C	C	C	C	C	C	C	C	C	C	C	C	C	C	C	C	C	C	C	T	T	C	C	C	C	T	T	C
DELTA_vs_BETA_23	1861	-341	SNP							A	A	A	A	A	A	A	A	A	A	A	A	A	A	G	A	A	A	A	A	A	A	A	A	A	A	A	A	A	A	A	A	A	A	A	A	A	A	A	A
DELTA_vs_BETA_23	1986	-216	INDEL_DEL_1986_1986							T	T	T	-	T	T	T	T	T	T	T	T	-	T	T	T	T	-	-	T	-	-	T	-	-	-	T	-	T	T	T	T	T	T	T	T	T	T	T	T
DELTA_vs_BETA_23	1994	-208	SNP							A	A	A	A	A	A	A	A	A	A	A	A	A	A	A	A	A	A	A	A	A	A	A	A	A	A	A	A	A	A	A	A	T	A	A	A	A	A	A	A
DELTA_vs_BETA_23	2030	-172	INDEL_DEL_2030_2030							A	-	-	-	-	-	-	-	-	-	-	-	-	-	-	-	-	-	-	-	-	-	-	-	-	-	-	-	-	-	-	-	-	-	-	-	-	-	-	-
DELTA_vs_BETA_23	2042	-160	SNP							C	C	T	C	T	C	T	C	C	C	C	C	C	C	C	C	C	C	C	C	C	C	C	C	C	C	C	C	C	C	C	C	C	C	C	C	C	C	C	T
DELTA_vs_BETA_23	2100	-102	SNP							G	A	A	A	A	A	A	A	A	A	A	A	A	G	G	G	G	A	A	A	A	A	A	A	A	A	A	A	G	A	A	A	A	A	A	A	A	A	A	A
DELTA_vs_BETA_23	2103	-99	SNP							T	A	A	A	A	A	A	A	A	A	A	A	A	T	T	T	T	A	A	A	A	A	A	A	A	A	A	A	T	A	A	A	A	A	A	A	A	A	A	A
DELTA_vs_BETA_23	2109	-93	SNP							A	A	A	C	A	A	A	A	A	A	A	A	C	A	A	A	A	C	C	C	C	C	A	C	C	C	C	C	A	A	C	A	A	C	A	C	C	A	A	A
DELTA_vs_BETA_23	2197	-5	SNP							A	A	A	A	A	A	A	A	A	A	A	A	A	A	A	A	A	A	A	C	A	A	A	A	A	A	C	A	A	A	A	A	A	A	A	C	C	A	A	A
DELTA_vs_BETA_23	2373	171	SNP							C	C	C	C	C	C	C	C	C	C	C	C	C	C	C	C	C	C	C	C	C	C	C	C	C	C	C	C	C	C	C	C	C	C	C	C	C	C	C	C
DELTA_vs_BETA_23	2386	184	SNP							G	G	G	G	G	G	G	G	G	G	G	G	G	G	G	G	G	G	G	G	G	G	G	G	G	G	G	G	G	G	G	G	G	G	G	G	G	G	G	G
DELTA_vs_BETA_23	2394	192	SNP							A	A	T	T	T	A	T	A	A	A	A	A	T	A	A	A	A	T	T	A	T	T	A	T	T	T	T	T	A	A	A	A	A	A	A	A	A	A	A	T
DELTA_vs_BETA_23	2488	286	SNP							G	G	G	G	G	G	G	G	G	G	G	G	G	G	G	G	G	T	T	G	T	T	G	T	T	G	G	T	G	G	G	G	G	G	G	G	G	G	G	G
DELTA_vs_BETA_23	2535	333	SNP							A	A	A	A	A	A	A	A	A	A	A	A	A	A	A	A	A	A	A	A	A	A	A	G	A	A	A	G	A	A	A	A	A	A	A	A	A	A	A	A
DELTA_vs_BETA_23	2554	352	SNP							T	T	T	T	T	T	T	T	T	T	T	T	T	T	T	T	T	T	T	G	T	T	T	T	T	T	T	T	T	T	T	T	T	T	T	T	T	T	T	T
DELTA_vs_BETA_23	2583	381	SNP							G	G	G	G	G	G	G	G	C	G	G	C	G	G	G	G	G	G	G	G	G	G	C	G	G	G	G	G	G	C	G	G	G	G	C	G	G	G	G	G
DELTA_vs_BETA_23	2614	412	SNP							G	A	G	G	G	A	G	A	G	A	A	G	G	G	G	G	G	G	G	G	G	G	G	G	G	G	G	G	G	G	G	A	A	G	G	G	G	A	A	G
DELTA_vs_BETA_23	2623	421	SNP							T	T	T	T	T	T	T	T	T	T	T	T	T	T	T	T	T	C	T	T	T	T	T	T	-	T	T	T	T	T	T	T	T	T	T	T	T	T	T	T
DELTA_vs_BETA_23	2624	422	SNP							T	-	T	T	T	-	T	-	T	-	-	T	T	T	T	T	T	G	T	T	T	T	T	T	-	T	T	T	T	T	T	-	-	T	T	T	T	-	-	T
DELTA_vs_BETA_23	2624	422	INDEL_DEL_2624_2624							T	-	T	T	T	-	T	-	T	-	-	T	T	T	T	T	T	G	T	T	T	T	T	T	-	T	T	T	T	T	T	-	-	T	T	T	T	-	-	T
DELTA_vs_BETA_23	2625	423	SNP							C	C	C	C	C	C	C	C	C	C	C	C	C	C	C	C	C	T	C	C	C	C	C	C	-	C	C	C	C	C	C	C	C	C	C	C	C	C	C	C
DELTA_vs_BETA_23	2628	426	SNP							G	G	G	G	G	G	G	G	G	G	G	G	G	G	G	G	G	T	T	G	G	G	G	G	-	G	G	G	G	G	G	G	G	G	G	G	G	G	G	G
DELTA_vs_BETA_23	2639	437	INDEL_DEL_2639_2640							TT	T-	TT	TT	TT	T-	T-	T-	TT	TT	T-	TT	TT	TT	TT	TT	TT	--	--	TT	TT	TT	TT	TT	--	TT	TT	TT	TT	TT	TT	TT	T-	TT	TT	TT	TT	T-	TT	TT
DELTA_vs_BETA_23	2640	438	INDEL_DEL_2640_2641							TT	--	TT	TT	TT	--	--	--	TT	TT	--	TT	TT	T-	TT	TT	TT	--	--	TT	T-	T-	TT	TT	--	TT	TT	TT	TT	TT	TT	TT	--	TT	TT	TT	TT	--	TT	TT
DELTA_vs_BETA_23	2641	439	INDEL_DEL_2641_2641							T	-	T	T	T	-	-	-	T	T	-	T	T	-	T	T	T	-	-	T	-	-	T	T	-	T	T	T	T	T	T	T	-	T	T	T	T	-	T	T
DELTA_vs_BETA_23	2666	464	SNP							C	C	C	C	C	C	C	C	T	C	C	T	C	T	T	T	T	C	C	C	C	C	T	C	C	C	C	C	T	T	C	C	C	C	T	C	C	C	C	C
DELTA_vs_BETA_23	2765	563	SNP							C	C	C	C	C	C	C	C	G	C	C	G	C	G	G	G	G	C	C	C	C	C	G	C	C	C	C	C	G	G	C	C	C	C	G	C	C	C	C	C
DELTA_vs_BETA_23	2839	637	SNP							A	A	A	A	A	A	A	A	C	A	A	C	A	C	C	C	C	A	A	A	A	A	C	A	A	A	A	A	C	C	A	A	A	A	C	A	A	A	A	A
DELTA_vs_BETA_23	3079	877	SNP							A	A	A	A	A	A	A	A	A	A	A	A	A	A	A	A	A	A	A	A	A	A	A	A	A	A	A	A	A	A	A	A	A	A	A	A	A	T	A	A
DELTA_vs_BETA_23	3097	895	SNP							C	C	C	C	C	C	C	C	C	C	C	C	C	C	C	C	C	T	T	C	T	T	C	T	T	C	C	T	C	C	C	C	C	C	C	C	C	C	C	C
DELTA_vs_BETA_23	3145	943	SNP							C	C	C	C	C	C	C	C	C	C	C	C	C	C	C	C	C	C	C	C	C	C	C	C	C	C	C	C	C	C	C	C	C	C	C	C	C	C	C	C
DELTA_vs_BETA_23	3288	1086	SNP							A	G	A	A	A	G	A	G	A	G	G	A	A	A	A	A	A	A	A	A	A	A	A	A	A	A	A	A	A	A	A	G	G	A	A	A	A	G	G	A
DELTA_vs_BETA_23	3332	1130	SNP							A	A	A	G	A	A	A	A	A	A	A	A	G	A	A	A	A	A	A	G	A	A	A	A	A	G	G	A	A	A	G	A	A	G	A	G	G	A	A	A
DELTA_vs_BETA_23	3503	1301	INDEL_DEL_3503_3503							-	-	-	C	-	-	-	-	-	-	-	-	C	-	-	-	-	-	-	-	-	-	-	-	-	-	-	-	-	-	-	-	-	-	-	-	-	-	-	-
DELTA_vs_BETA_23	3505	1303	INDEL_DEL_3505_3505							T	T	T	T	T	T	T	T	T	T	T	T	T	-	-	T	-	T	T	T	T	T	T	T	T	T	T	T	-	T	T	T	T	T	T	T	T	T	T	T
DELTA_vs_BETA_23	3589	1387	SNP							G	C	C	C	C	C	C	C	C	C	C	C	C	C	C	C	C	C	C	C	C	C	C	C	C	C	C	C	C	C	C	C	C	C	C	C	C	C	C	C
DELTA_vs_BETA_23	3663	1461	INDEL_DEL_3663_3664							--	--	--	--	--	--	--	--	AA	--	--	AA	--	AA	AA	AA	AA	--	--	--	--	--	AA	--	--	--	--	--	AA	AA	--	--	--	--	AA	--	--	--	--	--
DELTA_vs_BETA_23	3772	1570	SNP							C	C	C	C	C	C	C	C	C	C	C	C	C	A	C	C	C	C	C	C	C	C	C	C	C	C	C	C	C	C	C	C	C	C	C	C	C	C	C	C
DELTA_vs_BETA_23	3901	1699	INDEL_DEL_3901_3901							-	-	-	-	-	-	-	-	A	-	-	A	-	-	-	-	-	-	-	-	-	-	A	-	-	-	-	-	-	A	-	-	-	-	A	-	-	-	-	-
DELTA_vs_BETA_23	3975	1773	SNP							A	A	C	A	C	A	C	A	A	A	A	A	A	A	A	A	A	A	A	A	A	A	A	A	A	A	A	A	A	A	A	A	A	A	A	A	A	A	A	C
DELTA_vs_BETA_23	4014	1812	SNP							C	G	G	G	G	G	G	G	G	G	G	G	G	G	G	G	G	G	G	G	G	G	G	G	G	G	G	G	G	G	G	G	G	G	G	G	G	G	G	G
DELTA_vs_BETA_23	4026	1824	SNP							C	C	C	C	C	C	C	C	T	C	C	T	C	T	T	T	T	C	C	C	C	C	T	C	C	C	C	C	T	T	C	C	C	C	T	C	C	C	C	C
DELTA_vs_BETA_23	4110	1908	SNP							G	G	G	G	G	G	G	G	G	G	G	G	G	G	G	G	G	G	G	G	G	G	G	G	G	A	G	G	G	G	G	G	G	G	G	G	G	G	G	G
DELTA_vs_BETA_23	4118	1916	SNP							T	G	T	T	T	G	T	G	T	G	G	T	T	T	T	T	T	T	T	T	T	T	T	T	T	T	T	T	T	T	T	G	G	T	T	T	T	G	G	T
DELTA_vs_BETA_23	4263	2061	SNP							T	T	T	T	T	T	T	T	C	T	T	C	T	C	C	C	C	T	T	T	T	T	C	T	T	T	T	T	C	C	T	T	T	T	C	T	T	T	T	T
DELTA_vs_BETA_23	4324	2122	SNP							G	G	G	C	G	G	G	G	G	G	G	G	C	G	G	G	G	G	G	G	G	G	G	G	G	G	G	G	G	G	G	G	G	G	G	G	G	G	G	G
DELTA_vs_BETA_23	4360	2158	SNP							G	G	G	G	G	G	G	G	G	G	G	G	G	G	G	G	G	C	C	G	C	C	G	C	-	G	G	C	G	G	G	G	G	G	G	G	G	G	G	G
DELTA_vs_BETA_23	4550	2348	INDEL_DEL_4550_4551							--	--	--	TT	--	--	--	--	--	--	--	--	TT	--	--	--	--	--	--	--	--	--	--	--	--	--	--	--	--	--	--	--	--	--	--	--	TT	--	--	--
DELTA_vs_BETA_23	4682	2480	INDEL_DEL_4682_4682							C	C	C	C	C	C	C	C	C	C	C	C	C	C	C	C	C	C	C	C	C	C	C	C	-	C	-	C	C	C	C	C	C	C	C	C	C	C	C	C
DELTA_vs_BETA_23	4962	2760	SNP							G	G	G	G	G	G	G	G	G	G	G	G	G	G	G	G	G	G	G	G	G	G	G	G	A	G	G	G	G	G	G	G	G	G	G	G	G	G	G	G
DELTA_vs_BETA_23	4988	2786	SNP							G	G	G	-	G	G	G	G	G	G	G	G	-	G	G	G	G	G	G	T	T	G	G	-	G	G	G	T	G	G	G	G	G	G	G	-	-	G	G	G
DELTA_vs_BETA_23	5049	2847	SNP							A	A	A	T	A	A	A	A	A	A	A	A	T	A	A	A	A	A	A	A	A	A	A	A	A	A	A	A	A	A	A	A	A	A	A	A	A	A	A	A
DELTA_vs_BETA_23	5142	2940	SNP							A	A	A	A	A	A	A	A	A	A	A	A	A	A	A	A	A	A	A	A	A	A	A	A	A	A	A	A	A	A	A	A	A	A	A	T	A	A	A	A
DELTA_vs_BETA_23	5237	3035	INDEL_DEL_5237_5237							-	-	-	-	-	-	-	-	-	-	-	-	-	-	-	-	-	-	-	-	-	-	-	-	-	-	-	-	-	-	-	-	-	-	A	-	-	-	-	-
DELTA_vs_BETA_23	5245	3043	SNP							T	T	T	T	T	T	T	T	T	T	T	T	T	T	T	T	T	T	T	T	T	T	T	T	T	T	T	T	T	T	T	T	T	T	T	T	T	T	T	T
DELTA_vs_BETA_23	5248	3046	INDEL_DEL_5248_5249							--	--	T-	--	T-	--	TT	--	--	--	--	--	--	--	--	--	--	--	--	--	--	--	--	--	--	--	--	--	--	--	--	--	--	--	--	--	--	T-	--	T-
DELTA_vs_BETA_23	5249	3047	INDEL_DEL_5249_5249							-	-	-	-	-	-	T	-	-	-	-	-	-	-	-	-	-	-	-	-	-	-	-	-	-	-	-	-	-	-	-	-	-	-	-	-	-	-	-	-
DELTA_vs_BETA_23	5496	3294	SNP							G	G	G	G	G	G	G	G	G	G	G	G	G	A	A	A	A	G	G	G	G	G	G	G	G	G	G	G	A	G	G	G	G	G	G	G	G	G	G	G
DELTA_vs_BETA_23	5517	3315	SNP							G	G	G	G	G	G	G	G	G	G	G	G	G	G	G	G	G	G	G	G	G	G	G	G	G	G	G	G	G	G	G	G	G	G	G	G	G	G	G	G
DELTA_vs_BETA_23	5573	3371	SNP							T	T	T	T	T	T	T	T	T	T	T	T	T	T	T	T	T	T	T	T	A	T	T	-	T	T	T	T	T	T	T	T	T	T	T	T	T	T	T	T
DELTA_vs_BETA_23	5614	3412	SNP							T	T	T	T	T	T	T	T	T	T	A	T	T	T	T	T	T	T	T	-	T	T	T	T	T	-	-	T	T	T	T	T	T	T	T	T	T	T	T	T
DELTA_vs_BETA_23	5633	3431	INDEL_DEL_5633_5634							--	--	--	--	--	--	--	--	--	--	--	--	--	--	--	--	--	--	--	--	--	--	--	--	--	--	--	--	--	--	--	--	--	--	AT	--	--	--	--	--
DELTA_vs_BETA_23	5980	3778	INDEL_DEL_5980_5980							-	-	-	-	-	-	-	-	-	-	-	-	-	-	-	-	-	-	-	-	-	-	-	-	-	-	-	-	-	-	-	-	-	-	-	-	-	-	-	-
DELTA_vs_BETA_23	6126	3924	SNP							T	T	T	T	T	T	T	T	T	T	T	T	T	C	C	C	C	T	T	T	T	T	T	T	T	T	T	T	C	T	T	T	T	T	T	T	T	T	T	T
DELTA_vs_BETA_23	6166	3964	SNP							T	T	A	T	A	T	A	T	T	T	T	T	T	T	T	T	T	T	T	T	T	T	T	T	T	T	T	T	T	T	T	T	T	T	T	T	T	A	T	A
DELTA_vs_BETA_23	6184	3982	SNP							A	A	C	A	C	A	C	A	A	A	A	A	A	C	C	C	C	A	A	A	A	A	A	A	A	A	A	A	C	A	A	A	A	A	A	A	A	C	A	C
DELTA_vs_BETA_23	6185	3983	SNP							A	C	A	C	A	C	A	C	A	C	C	A	C	A	A	A	A	C	C	C	C	A	A	C	C	C	C	C	A	A	A	C	C	A	A	C	C	A	C	A
DELTA_vs_BETA_23	6186	3984	SNP							A	A	C	A	C	A	C	A	T	A	A	T	A	A	A	A	A	A	A	A	A	A	T	A	A	A	A	A	A	T	A	A	A	A	T	A	A	C	A	C
DELTA_vs_BETA_23	6352	4150	SNP							G	G	G	G	G	G	G	G	G	G	G	G	G	A	A	A	A	G	G	G	G	G	G	G	G	G	G	G	A	G	G	G	G	G	G	G	G	G	G	G
DELTA_vs_BETA_23	6374	4172	INDEL_DEL_6374_6374							T	T	T	T	T	T	T	T	T	T	T	T	T	T	T	T	-	T	T	T	T	T	T	T	T	T	T	T	-	T	T	T	T	T	T	T	T	T	T	T
DELTA_vs_BETA_23	6455	4253	SNP							A	A	A	A	A	A	A	A	A	A	A	A	A	A	A	A	A	A	A	A	G	G	A	A	A	A	A	A	A	A	A	A	A	A	A	A	A	A	A	A
DELTA_vs_BETA_23	6571	4369	INDEL_DEL_6571_6571							T	T	T	T	T	T	T	T	T	T	T	T	T	T	T	T	T	T	T	T	T	T	T	T	T	-	T	T	T	T	T	T	T	T	T	T	T	T	T	T
DELTA_vs_BETA_23	6656	4454	INDEL_DEL_6656_6656							T	T	T	T	T	T	T	T	T	T	T	T	T	T	T	T	T	T	-	T	T	T	T	T	T	T	T	T	T	T	T	T	T	T	T	T	T	T	T	T
DELTA_vs_BETA_23	6658	4456	SNP							T	T	T	T	T	T	T	T	T	T	C	T	T	T	T	T	T	T	T	T	T	T	T	T	T	T	T	T	T	T	T	T	T	T	T	T	T	T	T	T
DELTA_vs_BETA_23	6667	4465	SNP							T	T	T	T	T	T	T	T	T	T	T	T	T	T	T	T	T	T	T	T	T	T	T	T	T	T	T	T	T	T	T	T	T	A	T	T	T	T	T	T
DELTA_vs_BETA_23	6668	4466	INDEL_DEL_6668_6668							T	T	T	T	T	T	T	T	T	T	T	T	T	T	T	T	T	T	T	T	T	T	T	T	T	T	T	T	T	T	T	-	T	T	T	T	T	T	T	T
DELTA_vs_BETA_23	6681	4479	INDEL_DEL_6681_6681							T	T	-	-	T	T	T	T	T	T	-	T	-	T	T	T	T	T	-	T	T	-	T	T	T	T	T	-	T	T	T	T	-	T	T	T	-	T	-	T
DELTA_vs_BETA_23	6826	4624	INDEL_DEL_6826_6827							AT	AT	AT	AT	AT	AT	AT	AT	AT	AT	AT	AT	AT	AT	AT	AT	AT	--	AT	AT	AT	AT	AT	AT	AT	AT	AT	AT	AT	AT	AT	AT	AT	AT	AT	AT	AT	AT	AT	AT
DELTA_vs_BETA_23	6830	4628	SNP							G	G	G	G	G	G	G	G	G	G	G	G	G	A	A	A	A	G	G	G	G	G	G	G	G	G	G	G	A	G	G	G	G	G	G	G	G	G	G	G
DELTA_vs_BETA_15	49	-2153	SNP							A	A	C	C	C	A	C	A	A	A	A	A	C	A	A	A	A	C	C	A	C	C	A	C	C	C	C	C	A	A	A	A	A	A	A	C	C	A	A	C
DELTA_vs_BETA_15	85	-2117	SNP							T	T	T	T	T	T	T	T	T	T	T	T	T	T	T	T	T	T	T	T	T	T	T	T	T	T	T	T	T	T	T	T	T	T	T	T	T	T	T	T
DELTA_vs_BETA_15	111	-2091	SNP							C	C	C	C	C	C	C	C	C	C	C	C	C	C	C	C	C	C	C	G	C	C	C	C	C	C	C	C	C	C	C	C	C	C	C	C	C	C	C	C
DELTA_vs_BETA_15	119	-2083	SNP							T	T	G	G	G	T	G	T	T	T	T	T	G	T	T	T	T	G	G	T	G	G	T	G	G	G	G	G	T	T	T	T	T	T	T	G	G	T	T	G
DELTA_vs_BETA_15	183	-2019	SNP							A	G	A	A	A	G	A	G	A	G	G	A	A	A	A	A	A	A	A	A	A	A	A	A	A	A	A	A	A	A	A	G	G	A	A	A	A	G	G	A
DELTA_vs_BETA_15	202	-2000	SNP							A	C	C	C	C	C	C	C	C	C	C	C	C	A	A	A	A	C	C	C	C	C	C	C	C	C	C	C	A	C	C	C	C	C	C	C	C	C	C	C
DELTA_vs_BETA_15	216	-1986	SNP							G	A	A	A	A	A	A	A	A	A	A	A	A	G	G	G	G	A	A	A	A	A	A	A	A	A	A	A	G	A	A	A	A	A	A	A	A	A	A	A
DELTA_vs_BETA_15	222	-1980	SNP							G	A	A	A	A	A	A	A	A	A	A	A	A	G	G	G	G	A	A	A	A	A	A	A	A	A	A	A	G	A	A	A	A	A	A	A	A	A	A	A
DELTA_vs_BETA_15	264	-1938	SNP							C	C	C	C	C	C	C	C	C	C	C	C	C	T	T	T	T	C	C	C	C	C	C	C	C	C	C	C	T	C	C	C	C	C	C	C	C	C	C	C
DELTA_vs_BETA_15	374	-1828	INDEL_DEL_374_374							T	T	T	T	T	T	T	T	T	T	T	T	T	T	T	T	T	T	T	T	T	T	T	T	T	T	-	T	T	T	T	T	T	T	T	T	T	T	T	T
DELTA_vs_BETA_15	417	-1785	SNP							G	G	G	G	G	G	G	G	G	G	G	G	G	G	G	G	G	C	C	G	C	C	G	C	G	G	G	C	G	G	G	G	G	G	G	G	G	G	G	G
DELTA_vs_BETA_15	453	-1749	SNP							T	G	G	G	G	G	G	G	G	G	G	G	G	G	G	G	G	G	G	G	G	G	G	G	G	G	G	G	G	G	G	G	G	G	G	G	G	G	G	G
DELTA_vs_BETA_15	469	-1733	SNP							C	A	C	C	C	A	C	A	C	A	A	C	C	C	C	C	C	C	C	C	C	C	C	C	C	C	C	C	C	C	C	A	A	C	C	C	C	A	A	C
DELTA_vs_BETA_15	547	-1655	SNP							C	C	C	C	C	C	C	C	C	C	C	C	C	C	C	C	C	C	C	C	C	C	C	C	C	C	C	C	C	C	C	C	C	C	G	C	C	C	C	C
DELTA_vs_BETA_15	628	-1574	SNP							G	A	A	A	A	A	A	A	A	A	A	A	A	A	A	A	A	A	A	A	A	A	A	A	A	A	A	A	A	A	A	A	A	A	A	A	A	A	A	A
DELTA_vs_BETA_15	650	-1552	SNP							G	A	A	A	A	A	A	A	G	A	A	G	A	G	G	G	G	A	A	A	A	A	G	A	A	A	A	A	G	G	A	A	A	A	G	A	A	A	A	A
DELTA_vs_BETA_15	662	-1540	SNP							A	A	T	T	T	A	T	A	T	A	A	T	T	T	T	C	T	A	A	A	A	A	T	A	T	T	A	A	T	T	A	A	A	A	T	T	T	A	A	T
DELTA_vs_BETA_15	667	-1535	SNP							T	T	T	T	T	T	T	T	T	T	T	T	T	-	G	-	-	T	T	T	T	T	T	T	T	T	T	T	-	T	T	T	T	T	T	T	T	T	T	T
DELTA_vs_BETA_15	736	-1466	INDEL_DEL_736_736							A	A	A	A	A	A	A	A	A	A	A	A	A	-	-	-	-	A	A	A	A	A	A	A	A	A	A	A	-	A	A	A	A	A	A	A	A	A	A	A
DELTA_vs_BETA_15	755	-1447	SNP							G	G	G	G	G	G	G	G	G	G	G	G	G	G	G	G	A	G	G	G	G	G	G	G	G	G	G	G	G	G	G	G	G	G	G	G	G	G	G	G
DELTA_vs_BETA_15	781	-1421	SNP							T	T	T	T	T	T	T	T	T	T	T	T	T	T	T	T	T	T	T	T	T	T	T	T	T	T	T	C	T	T	T	T	T	T	T	T	T	T	T	T
DELTA_vs_BETA_15	832	-1370	INDEL_DEL_832_832							A	A	A	-	-	A	-	A	A	A	A	A	-	A	A	A	A	A	A	A	A	A	A	A	A	-	-	A	A	A	A	A	A	A	A	-	-	A	A	-
DELTA_vs_BETA_15	833	-1369	SNP							A	A	T	T	T	A	T	A	A	A	A	A	T	A	A	A	A	A	A	A	A	A	A	A	A	T	T	A	A	A	A	A	A	A	A	T	T	A	A	T
DELTA_vs_BETA_15	891	-1311	SNP							G	G	C	C	C	G	C	G	G	G	G	G	C	G	G	G	G	G	G	G	G	G	G	G	G	C	C	G	G	G	G	G	G	G	G	C	C	G	G	C
DELTA_vs_BETA_15	909	-1293	SNP							T	T	C	C	C	T	C	T	T	T	T	T	C	T	T	T	T	T	T	T	T	T	T	T	T	C	C	T	T	T	T	T	T	T	T	C	C	T	T	C
DELTA_vs_BETA_15	958	-1244	SNP							T	T	G	C	G	T	G	T	T	T	T	T	C	T	T	T	T	T	T	T	T	T	T	T	T	C	C	T	T	T	T	T	T	T	T	C	C	T	T	G
DELTA_vs_BETA_15	975	-1227	INDEL_DEL_975_976							GA	GA	GA	GA	GA	GA	GA	GA	GA	GA	GA	GA	GA	GA	GA	GA	GA	GA	GA	GA	GA	GA	GA	GA	GA	GA	GA	--	GA	GA	GA	GA	GA	GA	GA	GA	GA	GA	GA	GA
DELTA_vs_BETA_15	1007	-1195	INDEL_DEL_1007_1008							T-	T-	TT	TT	--	T-	TT	TT	TT	TT	T-	TT	TT	TT	TT	TT	TT	TT	TT	TT	TT	TT	TT	TT	TT	T-	TT	TT	TT	TT	TT	TT	T-	TT	TT	T-	T-	T-	TT	--
DELTA_vs_BETA_15	1008	-1194	INDEL_DEL_1008_1008							-	-	T	T	-	-	T	T	T	T	-	T	T	T	T	T	T	T	T	T	T	T	T	T	T	-	T	T	T	T	T	T	-	T	T	-	-	-	T	-
DELTA_vs_BETA_15	1150	-1052	SNP							A	T	A	A	A	T	A	T	A	T	T	A	A	A	A	A	A	A	A	A	A	A	A	A	A	A	A	A	A	A	A	T	T	A	A	A	A	T	T	A
DELTA_vs_BETA_15	1191	-1011	SNP							G	G	G	G	G	G	G	G	G	G	G	G	G	G	G	G	G	G	G	G	G	G	G	G	G	C	G	G	G	G	G	G	G	G	G	G	G	G	G	G
DELTA_vs_BETA_15	1223	-979	SNP							A	A	A	A	A	A	A	A	A	A	A	A	A	A	A	A	A	A	A	A	A	A	A	A	A	A	A	A	A	A	G	A	A	G	A	A	A	A	A	A
DELTA_vs_BETA_15	1228	-974	SNP							A	A	A	A	A	A	A	A	A	A	A	A	A	A	A	A	A	A	A	G	A	A	A	A	A	A	A	A	A	A	A	A	A	A	A	A	A	A	A	A
DELTA_vs_BETA_15	1321	-881	SNP							G	G	G	G	G	G	G	G	G	G	G	G	G	G	G	G	G	G	G	G	G	G	G	G	G	G	G	G	G	G	T	G	G	T	G	G	G	G	G	G
DELTA_vs_BETA_15	1354	-848	SNP							G	G	G	G	G	G	G	G	G	G	G	G	G	G	G	G	G	T	T	G	T	T	G	T	T	G	G	T	G	G	G	G	G	G	G	G	G	G	G	G
DELTA_vs_BETA_15	1364	-838	SNP							A	A	A	A	A	A	A	A	G	A	A	G	A	A	A	A	A	A	A	A	A	A	G	A	A	A	A	A	A	G	A	A	A	A	G	A	A	A	A	A
DELTA_vs_BETA_15	1404	-798	SNP							G	G	G	G	G	G	G	G	G	G	G	G	G	G	G	G	G	G	G	G	T	T	G	T	T	G	G	T	G	G	G	G	G	G	G	G	G	G	G	G
DELTA_vs_BETA_15	1656	-546	SNP							G	G	G	A	G	G	G	G	G	G	G	G	A	G	G	G	G	G	G	G	G	G	G	G	G	G	G	G	G	G	G	G	G	G	G	G	G	G	G	G
DELTA_vs_BETA_15	1734	-468	SNP							C	C	C	C	C	C	C	C	C	C	C	C	C	C	C	C	C	C	C	C	C	C	C	C	C	C	C	C	C	C	T	C	C	T	C	C	C	C	C	C
DELTA_vs_BETA_15	1832	-370	SNP							C	T	C	C	C	T	C	T	C	T	T	C	C	C	C	C	C	C	C	C	C	C	C	C	C	C	C	C	C	C	C	T	T	C	C	C	C	T	T	C
DELTA_vs_BETA_15	1861	-341	SNP							A	A	A	A	A	A	A	A	A	A	A	A	A	A	G	A	A	A	A	A	A	A	A	A	A	A	A	A	A	A	A	A	A	A	A	A	A	A	A	A
DELTA_vs_BETA_15	1986	-216	INDEL_DEL_1986_1986							T	T	T	-	T	T	T	T	T	T	T	T	-	T	T	T	T	-	-	T	-	-	T	-	-	-	T	-	T	T	T	T	T	T	T	T	T	T	T	T
DELTA_vs_BETA_15	1994	-208	SNP							A	A	A	A	A	A	A	A	A	A	A	A	A	A	A	A	A	A	A	A	A	A	A	A	A	A	A	A	A	A	A	A	T	A	A	A	A	A	A	A
DELTA_vs_BETA_15	2030	-172	INDEL_DEL_2030_2030							A	-	-	-	-	-	-	-	-	-	-	-	-	-	-	-	-	-	-	-	-	-	-	-	-	-	-	-	-	-	-	-	-	-	-	-	-	-	-	-
DELTA_vs_BETA_15	2042	-160	SNP							C	C	T	C	T	C	T	C	C	C	C	C	C	C	C	C	C	C	C	C	C	C	C	C	C	C	C	C	C	C	C	C	C	C	C	C	C	C	C	T
DELTA_vs_BETA_15	2100	-102	SNP							G	A	A	A	A	A	A	A	A	A	A	A	A	G	G	G	G	A	A	A	A	A	A	A	A	A	A	A	G	A	A	A	A	A	A	A	A	A	A	A
DELTA_vs_BETA_15	2103	-99	SNP							T	A	A	A	A	A	A	A	A	A	A	A	A	T	T	T	T	A	A	A	A	A	A	A	A	A	A	A	T	A	A	A	A	A	A	A	A	A	A	A
DELTA_vs_BETA_15	2109	-93	SNP							A	A	A	C	A	A	A	A	A	A	A	A	C	A	A	A	A	C	C	C	C	C	A	C	C	C	C	C	A	A	C	A	A	C	A	C	C	A	A	A
DELTA_vs_BETA_15	2197	-5	SNP							A	A	A	A	A	A	A	A	A	A	A	A	A	A	A	A	A	A	A	C	A	A	A	A	A	A	C	A	A	A	A	A	A	A	A	C	C	A	A	A
DELTA_vs_BETA_15	2373	171	SNP							C	C	C	C	C	C	C	C	C	C	C	C	C	C	C	C	C	C	C	C	C	C	C	C	C	C	C	C	C	C	C	C	C	C	C	C	C	C	C	C
DELTA_vs_BETA_15	2386	184	SNP							G	G	G	G	G	G	G	G	G	G	G	G	G	G	G	G	G	G	G	G	G	G	G	G	G	G	G	G	G	G	G	G	G	G	G	G	G	G	G	G
DELTA_vs_BETA_15	2394	192	SNP							A	A	T	T	T	A	T	A	A	A	A	A	T	A	A	A	A	T	T	A	T	T	A	T	T	T	T	T	A	A	A	A	A	A	A	A	A	A	A	T
DELTA_vs_BETA_15	2488	286	SNP							G	G	G	G	G	G	G	G	G	G	G	G	G	G	G	G	G	T	T	G	T	T	G	T	T	G	G	T	G	G	G	G	G	G	G	G	G	G	G	G
DELTA_vs_BETA_15	2535	333	SNP							A	A	A	A	A	A	A	A	A	A	A	A	A	A	A	A	A	A	A	A	A	A	A	G	A	A	A	G	A	A	A	A	A	A	A	A	A	A	A	A
DELTA_vs_BETA_15	2554	352	SNP							T	T	T	T	T	T	T	T	T	T	T	T	T	T	T	T	T	T	T	G	T	T	T	T	T	T	T	T	T	T	T	T	T	T	T	T	T	T	T	T
DELTA_vs_BETA_15	2583	381	SNP							G	G	G	G	G	G	G	G	C	G	G	C	G	G	G	G	G	G	G	G	G	G	C	G	G	G	G	G	G	C	G	G	G	G	C	G	G	G	G	G
DELTA_vs_BETA_15	2614	412	SNP							G	A	G	G	G	A	G	A	G	A	A	G	G	G	G	G	G	G	G	G	G	G	G	G	G	G	G	G	G	G	G	A	A	G	G	G	G	A	A	G
DELTA_vs_BETA_15	2623	421	SNP							T	T	T	T	T	T	T	T	T	T	T	T	T	T	T	T	T	C	T	T	T	T	T	T	-	T	T	T	T	T	T	T	T	T	T	T	T	T	T	T
DELTA_vs_BETA_15	2624	422	SNP							T	-	T	T	T	-	T	-	T	-	-	T	T	T	T	T	T	G	T	T	T	T	T	T	-	T	T	T	T	T	T	-	-	T	T	T	T	-	-	T
DELTA_vs_BETA_15	2624	422	INDEL_DEL_2624_2624							T	-	T	T	T	-	T	-	T	-	-	T	T	T	T	T	T	G	T	T	T	T	T	T	-	T	T	T	T	T	T	-	-	T	T	T	T	-	-	T
DELTA_vs_BETA_15	2625	423	SNP							C	C	C	C	C	C	C	C	C	C	C	C	C	C	C	C	C	T	C	C	C	C	C	C	-	C	C	C	C	C	C	C	C	C	C	C	C	C	C	C
DELTA_vs_BETA_15	2628	426	SNP							G	G	G	G	G	G	G	G	G	G	G	G	G	G	G	G	G	T	T	G	G	G	G	G	-	G	G	G	G	G	G	G	G	G	G	G	G	G	G	G
DELTA_vs_BETA_15	2639	437	INDEL_DEL_2639_2640							TT	T-	TT	TT	TT	T-	T-	T-	TT	TT	T-	TT	TT	TT	TT	TT	TT	--	--	TT	TT	TT	TT	TT	--	TT	TT	TT	TT	TT	TT	TT	T-	TT	TT	TT	TT	T-	TT	TT
DELTA_vs_BETA_15	2640	438	INDEL_DEL_2640_2641							TT	--	TT	TT	TT	--	--	--	TT	TT	--	TT	TT	T-	TT	TT	TT	--	--	TT	T-	T-	TT	TT	--	TT	TT	TT	TT	TT	TT	TT	--	TT	TT	TT	TT	--	TT	TT
DELTA_vs_BETA_15	2641	439	INDEL_DEL_2641_2641							T	-	T	T	T	-	-	-	T	T	-	T	T	-	T	T	T	-	-	T	-	-	T	T	-	T	T	T	T	T	T	T	-	T	T	T	T	-	T	T
DELTA_vs_BETA_15	2666	464	SNP							C	C	C	C	C	C	C	C	T	C	C	T	C	T	T	T	T	C	C	C	C	C	T	C	C	C	C	C	T	T	C	C	C	C	T	C	C	C	C	C
DELTA_vs_BETA_15	2765	563	SNP							C	C	C	C	C	C	C	C	G	C	C	G	C	G	G	G	G	C	C	C	C	C	G	C	C	C	C	C	G	G	C	C	C	C	G	C	C	C	C	C
DELTA_vs_BETA_15	2839	637	SNP							A	A	A	A	A	A	A	A	C	A	A	C	A	C	C	C	C	A	A	A	A	A	C	A	A	A	A	A	C	C	A	A	A	A	C	A	A	A	A	A
DELTA_vs_BETA_15	3079	877	SNP							A	A	A	A	A	A	A	A	A	A	A	A	A	A	A	A	A	A	A	A	A	A	A	A	A	A	A	A	A	A	A	A	A	A	A	A	A	T	A	A
DELTA_vs_BETA_15	3097	895	SNP							C	C	C	C	C	C	C	C	C	C	C	C	C	C	C	C	C	T	T	C	T	T	C	T	T	C	C	T	C	C	C	C	C	C	C	C	C	C	C	C
DELTA_vs_BETA_15	3145	943	SNP							C	C	C	C	C	C	C	C	C	C	C	C	C	C	C	C	C	C	C	C	C	C	C	C	C	C	C	C	C	C	C	C	C	C	C	C	C	C	C	C
DELTA_vs_BETA_15	3288	1086	SNP							A	G	A	A	A	G	A	G	A	G	G	A	A	A	A	A	A	A	A	A	A	A	A	A	A	A	A	A	A	A	A	G	G	A	A	A	A	G	G	A
DELTA_vs_BETA_15	3332	1130	SNP							A	A	A	G	A	A	A	A	A	A	A	A	G	A	A	A	A	A	A	G	A	A	A	A	A	G	G	A	A	A	G	A	A	G	A	G	G	A	A	A
DELTA_vs_BETA_15	3503	1301	INDEL_DEL_3503_3503							-	-	-	C	-	-	-	-	-	-	-	-	C	-	-	-	-	-	-	-	-	-	-	-	-	-	-	-	-	-	-	-	-	-	-	-	-	-	-	-
DELTA_vs_BETA_15	3505	1303	INDEL_DEL_3505_3505							T	T	T	T	T	T	T	T	T	T	T	T	T	-	-	T	-	T	T	T	T	T	T	T	T	T	T	T	-	T	T	T	T	T	T	T	T	T	T	T
DELTA_vs_BETA_15	3589	1387	SNP							G	C	C	C	C	C	C	C	C	C	C	C	C	C	C	C	C	C	C	C	C	C	C	C	C	C	C	C	C	C	C	C	C	C	C	C	C	C	C	C
DELTA_vs_BETA_15	3663	1461	INDEL_DEL_3663_3664							--	--	--	--	--	--	--	--	AA	--	--	AA	--	AA	AA	AA	AA	--	--	--	--	--	AA	--	--	--	--	--	AA	AA	--	--	--	--	AA	--	--	--	--	--
DELTA_vs_BETA_15	3772	1570	SNP							C	C	C	C	C	C	C	C	C	C	C	C	C	A	C	C	C	C	C	C	C	C	C	C	C	C	C	C	C	C	C	C	C	C	C	C	C	C	C	C
DELTA_vs_BETA_15	3901	1699	INDEL_DEL_3901_3901							-	-	-	-	-	-	-	-	A	-	-	A	-	-	-	-	-	-	-	-	-	-	A	-	-	-	-	-	-	A	-	-	-	-	A	-	-	-	-	-
DELTA_vs_BETA_15	3975	1773	SNP							A	A	C	A	C	A	C	A	A	A	A	A	A	A	A	A	A	A	A	A	A	A	A	A	A	A	A	A	A	A	A	A	A	A	A	A	A	A	A	C
DELTA_vs_BETA_15	4014	1812	SNP							C	G	G	G	G	G	G	G	G	G	G	G	G	G	G	G	G	G	G	G	G	G	G	G	G	G	G	G	G	G	G	G	G	G	G	G	G	G	G	G
DELTA_vs_BETA_15	4026	1824	SNP							C	C	C	C	C	C	C	C	T	C	C	T	C	T	T	T	T	C	C	C	C	C	T	C	C	C	C	C	T	T	C	C	C	C	T	C	C	C	C	C
DELTA_vs_BETA_15	4110	1908	SNP							G	G	G	G	G	G	G	G	G	G	G	G	G	G	G	G	G	G	G	G	G	G	G	G	G	A	G	G	G	G	G	G	G	G	G	G	G	G	G	G
DELTA_vs_BETA_15	4118	1916	SNP							T	G	T	T	T	G	T	G	T	G	G	T	T	T	T	T	T	T	T	T	T	T	T	T	T	T	T	T	T	T	T	G	G	T	T	T	T	G	G	T
DELTA_vs_BETA_15	4263	2061	SNP							T	T	T	T	T	T	T	T	C	T	T	C	T	C	C	C	C	T	T	T	T	T	C	T	T	T	T	T	C	C	T	T	T	T	C	T	T	T	T	T
DELTA_vs_BETA_15	4324	2122	SNP							G	G	G	C	G	G	G	G	G	G	G	G	C	G	G	G	G	G	G	G	G	G	G	G	G	G	G	G	G	G	G	G	G	G	G	G	G	G	G	G
DELTA_vs_BETA_15	4360	2158	SNP							G	G	G	G	G	G	G	G	G	G	G	G	G	G	G	G	G	C	C	G	C	C	G	C	-	G	G	C	G	G	G	G	G	G	G	G	G	G	G	G
DELTA_vs_BETA_15	4550	2348	INDEL_DEL_4550_4551							--	--	--	TT	--	--	--	--	--	--	--	--	TT	--	--	--	--	--	--	--	--	--	--	--	--	--	--	--	--	--	--	--	--	--	--	--	TT	--	--	--
DELTA_vs_BETA_15	4682	2480	INDEL_DEL_4682_4682							C	C	C	C	C	C	C	C	C	C	C	C	C	C	C	C	C	C	C	C	C	C	C	C	-	C	-	C	C	C	C	C	C	C	C	C	C	C	C	C
DELTA_vs_BETA_15	4962	2760	SNP							G	G	G	G	G	G	G	G	G	G	G	G	G	G	G	G	G	G	G	G	G	G	G	G	A	G	G	G	G	G	G	G	G	G	G	G	G	G	G	G
DELTA_vs_BETA_15	4988	2786	SNP							G	G	G	-	G	G	G	G	G	G	G	G	-	G	G	G	G	G	G	T	T	G	G	-	G	G	G	T	G	G	G	G	G	G	G	-	-	G	G	G
DELTA_vs_BETA_15	5049	2847	SNP							A	A	A	T	A	A	A	A	A	A	A	A	T	A	A	A	A	A	A	A	A	A	A	A	A	A	A	A	A	A	A	A	A	A	A	A	A	A	A	A
DELTA_vs_BETA_15	5142	2940	SNP							A	A	A	A	A	A	A	A	A	A	A	A	A	A	A	A	A	A	A	A	A	A	A	A	A	A	A	A	A	A	A	A	A	A	A	T	A	A	A	A
DELTA_vs_BETA_15	5237	3035	INDEL_DEL_5237_5237							-	-	-	-	-	-	-	-	-	-	-	-	-	-	-	-	-	-	-	-	-	-	-	-	-	-	-	-	-	-	-	-	-	-	A	-	-	-	-	-
DELTA_vs_BETA_15	5245	3043	SNP							T	T	T	T	T	T	T	T	T	T	T	T	T	T	T	T	T	T	T	T	T	T	T	T	T	T	T	T	T	T	T	T	T	T	T	T	T	T	T	T
DELTA_vs_BETA_15	5248	3046	INDEL_DEL_5248_5249							--	--	T-	--	T-	--	TT	--	--	--	--	--	--	--	--	--	--	--	--	--	--	--	--	--	--	--	--	--	--	--	--	--	--	--	--	--	--	T-	--	T-
DELTA_vs_BETA_15	5249	3047	INDEL_DEL_5249_5249							-	-	-	-	-	-	T	-	-	-	-	-	-	-	-	-	-	-	-	-	-	-	-	-	-	-	-	-	-	-	-	-	-	-	-	-	-	-	-	-
DELTA_vs_BETA_15	5496	3294	SNP							G	G	G	G	G	G	G	G	G	G	G	G	G	A	A	A	A	G	G	G	G	G	G	G	G	G	G	G	A	G	G	G	G	G	G	G	G	G	G	G
DELTA_vs_BETA_15	5517	3315	SNP							G	G	G	G	G	G	G	G	G	G	G	G	G	G	G	G	G	G	G	G	G	G	G	G	G	G	G	G	G	G	G	G	G	G	G	G	G	G	G	G
DELTA_vs_BETA_15	5573	3371	SNP							T	T	T	T	T	T	T	T	T	T	T	T	T	T	T	T	T	T	T	T	A	T	T	-	T	T	T	T	T	T	T	T	T	T	T	T	T	T	T	T
DELTA_vs_BETA_15	5614	3412	SNP							T	T	T	T	T	T	T	T	T	T	A	T	T	T	T	T	T	T	T	-	T	T	T	T	T	-	-	T	T	T	T	T	T	T	T	T	T	T	T	T
DELTA_vs_BETA_15	5633	3431	INDEL_DEL_5633_5634							--	--	--	--	--	--	--	--	--	--	--	--	--	--	--	--	--	--	--	--	--	--	--	--	--	--	--	--	--	--	--	--	--	--	AT	--	--	--	--	--
DELTA_vs_BETA_15	5980	3778	INDEL_DEL_5980_5980							-	-	-	-	-	-	-	-	-	-	-	-	-	-	-	-	-	-	-	-	-	-	-	-	-	-	-	-	-	-	-	-	-	-	-	-	-	-	-	-
DELTA_vs_BETA_15	6126	3924	SNP							T	T	T	T	T	T	T	T	T	T	T	T	T	C	C	C	C	T	T	T	T	T	T	T	T	T	T	T	C	T	T	T	T	T	T	T	T	T	T	T
DELTA_vs_BETA_15	6166	3964	SNP							T	T	A	T	A	T	A	T	T	T	T	T	T	T	T	T	T	T	T	T	T	T	T	T	T	T	T	T	T	T	T	T	T	T	T	T	T	A	T	A
DELTA_vs_BETA_15	6184	3982	SNP							A	A	C	A	C	A	C	A	A	A	A	A	A	C	C	C	C	A	A	A	A	A	A	A	A	A	A	A	C	A	A	A	A	A	A	A	A	C	A	C
DELTA_vs_BETA_15	6185	3983	SNP							A	C	A	C	A	C	A	C	A	C	C	A	C	A	A	A	A	C	C	C	C	A	A	C	C	C	C	C	A	A	A	C	C	A	A	C	C	A	C	A
DELTA_vs_BETA_15	6186	3984	SNP							A	A	C	A	C	A	C	A	T	A	A	T	A	A	A	A	A	A	A	A	A	A	T	A	A	A	A	A	A	T	A	A	A	A	T	A	A	C	A	C
DELTA_vs_BETA_15	6352	4150	SNP							G	G	G	G	G	G	G	G	G	G	G	G	G	A	A	A	A	G	G	G	G	G	G	G	G	G	G	G	A	G	G	G	G	G	G	G	G	G	G	G
DELTA_vs_BETA_15	6374	4172	INDEL_DEL_6374_6374							T	T	T	T	T	T	T	T	T	T	T	T	T	T	T	T	-	T	T	T	T	T	T	T	T	T	T	T	-	T	T	T	T	T	T	T	T	T	T	T
DELTA_vs_BETA_15	6455	4253	SNP							A	A	A	A	A	A	A	A	A	A	A	A	A	A	A	A	A	A	A	A	G	G	A	A	A	A	A	A	A	A	A	A	A	A	A	A	A	A	A	A
DELTA_vs_BETA_15	6571	4369	INDEL_DEL_6571_6571							T	T	T	T	T	T	T	T	T	T	T	T	T	T	T	T	T	T	T	T	T	T	T	T	T	-	T	T	T	T	T	T	T	T	T	T	T	T	T	T
DELTA_vs_BETA_15	6656	4454	INDEL_DEL_6656_6656							T	T	T	T	T	T	T	T	T	T	T	T	T	T	T	T	T	T	-	T	T	T	T	T	T	T	T	T	T	T	T	T	T	T	T	T	T	T	T	T
DELTA_vs_BETA_15	6658	4456	SNP							T	T	T	T	T	T	T	T	T	T	C	T	T	T	T	T	T	T	T	T	T	T	T	T	T	T	T	T	T	T	T	T	T	T	T	T	T	T	T	T
DELTA_vs_BETA_15	6667	4465	SNP							T	T	T	T	T	T	T	T	T	T	T	T	T	T	T	T	T	T	T	T	T	T	T	T	T	T	T	T	T	T	T	T	T	A	T	T	T	T	T	T
DELTA_vs_BETA_15	6668	4466	INDEL_DEL_6668_6668							T	T	T	T	T	T	T	T	T	T	T	T	T	T	T	T	T	T	T	T	T	T	T	T	T	T	T	T	T	T	T	-	T	T	T	T	T	T	T	T
DELTA_vs_BETA_15	6681	4479	INDEL_DEL_6681_6681							T	T	-	-	T	T	T	T	T	T	-	T	-	T	T	T	T	T	-	T	T	-	T	T	T	T	T	-	T	T	T	T	-	T	T	T	-	T	-	T
DELTA_vs_BETA_15	6826	4624	INDEL_DEL_6826_6827							AT	AT	AT	AT	AT	AT	AT	AT	AT	AT	AT	AT	AT	AT	AT	AT	AT	--	AT	AT	AT	AT	AT	AT	AT	AT	AT	AT	AT	AT	AT	AT	AT	AT	AT	AT	AT	AT	AT	AT
DELTA_vs_BETA_15	6830	4628	SNP							G	G	G	G	G	G	G	G	G	G	G	G	G	A	A	A	A	G	G	G	G	G	G	G	G	G	G	G	A	G	G	G	G	G	G	G	G	G	G	G
DELTA_15_vs._23	49	-2153	SNP							A	A	C	C	C	A	C	A	A	A	A	A	C	A	A	A	A	C	C	A	C	C	A	C	C	C	C	C	A	A	A	A	A	A	A	C	C	A	A	C
DELTA_15_vs._23	85	-2117	SNP							T	T	T	T	T	T	T	T	T	T	T	T	T	T	T	T	T	T	T	T	T	T	T	T	T	T	T	T	T	T	T	T	T	T	T	T	T	T	T	T
DELTA_15_vs._23	111	-2091	SNP							C	C	C	C	C	C	C	C	C	C	C	C	C	C	C	C	C	C	C	G	C	C	C	C	C	C	C	C	C	C	C	C	C	C	C	C	C	C	C	C
DELTA_15_vs._23	119	-2083	SNP							T	T	G	G	G	T	G	T	T	T	T	T	G	T	T	T	T	G	G	T	G	G	T	G	G	G	G	G	T	T	T	T	T	T	T	G	G	T	T	G
DELTA_15_vs._23	183	-2019	SNP							A	G	A	A	A	G	A	G	A	G	G	A	A	A	A	A	A	A	A	A	A	A	A	A	A	A	A	A	A	A	A	G	G	A	A	A	A	G	G	A
DELTA_15_vs._23	202	-2000	SNP							A	C	C	C	C	C	C	C	C	C	C	C	C	A	A	A	A	C	C	C	C	C	C	C	C	C	C	C	A	C	C	C	C	C	C	C	C	C	C	C
DELTA_15_vs._23	216	-1986	SNP							G	A	A	A	A	A	A	A	A	A	A	A	A	G	G	G	G	A	A	A	A	A	A	A	A	A	A	A	G	A	A	A	A	A	A	A	A	A	A	A
DELTA_15_vs._23	222	-1980	SNP							G	A	A	A	A	A	A	A	A	A	A	A	A	G	G	G	G	A	A	A	A	A	A	A	A	A	A	A	G	A	A	A	A	A	A	A	A	A	A	A
DELTA_15_vs._23	264	-1938	SNP							C	C	C	C	C	C	C	C	C	C	C	C	C	T	T	T	T	C	C	C	C	C	C	C	C	C	C	C	T	C	C	C	C	C	C	C	C	C	C	C
DELTA_15_vs._23	374	-1828	INDEL_DEL_374_374							T	T	T	T	T	T	T	T	T	T	T	T	T	T	T	T	T	T	T	T	T	T	T	T	T	T	-	T	T	T	T	T	T	T	T	T	T	T	T	T
DELTA_15_vs._23	417	-1785	SNP							G	G	G	G	G	G	G	G	G	G	G	G	G	G	G	G	G	C	C	G	C	C	G	C	G	G	G	C	G	G	G	G	G	G	G	G	G	G	G	G
DELTA_15_vs._23	453	-1749	SNP							T	G	G	G	G	G	G	G	G	G	G	G	G	G	G	G	G	G	G	G	G	G	G	G	G	G	G	G	G	G	G	G	G	G	G	G	G	G	G	G
DELTA_15_vs._23	469	-1733	SNP							C	A	C	C	C	A	C	A	C	A	A	C	C	C	C	C	C	C	C	C	C	C	C	C	C	C	C	C	C	C	C	A	A	C	C	C	C	A	A	C
DELTA_15_vs._23	547	-1655	SNP							C	C	C	C	C	C	C	C	C	C	C	C	C	C	C	C	C	C	C	C	C	C	C	C	C	C	C	C	C	C	C	C	C	C	G	C	C	C	C	C
DELTA_15_vs._23	628	-1574	SNP							G	A	A	A	A	A	A	A	A	A	A	A	A	A	A	A	A	A	A	A	A	A	A	A	A	A	A	A	A	A	A	A	A	A	A	A	A	A	A	A
DELTA_15_vs._23	650	-1552	SNP							G	A	A	A	A	A	A	A	G	A	A	G	A	G	G	G	G	A	A	A	A	A	G	A	A	A	A	A	G	G	A	A	A	A	G	A	A	A	A	A
DELTA_15_vs._23	662	-1540	SNP							A	A	T	T	T	A	T	A	T	A	A	T	T	T	T	C	T	A	A	A	A	A	T	A	T	T	A	A	T	T	A	A	A	A	T	T	T	A	A	T
DELTA_15_vs._23	667	-1535	SNP							T	T	T	T	T	T	T	T	T	T	T	T	T	-	G	-	-	T	T	T	T	T	T	T	T	T	T	T	-	T	T	T	T	T	T	T	T	T	T	T
DELTA_15_vs._23	736	-1466	INDEL_DEL_736_736							A	A	A	A	A	A	A	A	A	A	A	A	A	-	-	-	-	A	A	A	A	A	A	A	A	A	A	A	-	A	A	A	A	A	A	A	A	A	A	A
DELTA_15_vs._23	755	-1447	SNP							G	G	G	G	G	G	G	G	G	G	G	G	G	G	G	G	A	G	G	G	G	G	G	G	G	G	G	G	G	G	G	G	G	G	G	G	G	G	G	G
DELTA_15_vs._23	781	-1421	SNP							T	T	T	T	T	T	T	T	T	T	T	T	T	T	T	T	T	T	T	T	T	T	T	T	T	T	T	C	T	T	T	T	T	T	T	T	T	T	T	T
DELTA_15_vs._23	832	-1370	INDEL_DEL_832_832							A	A	A	-	-	A	-	A	A	A	A	A	-	A	A	A	A	A	A	A	A	A	A	A	A	-	-	A	A	A	A	A	A	A	A	-	-	A	A	-
DELTA_15_vs._23	833	-1369	SNP							A	A	T	T	T	A	T	A	A	A	A	A	T	A	A	A	A	A	A	A	A	A	A	A	A	T	T	A	A	A	A	A	A	A	A	T	T	A	A	T
DELTA_15_vs._23	891	-1311	SNP							G	G	C	C	C	G	C	G	G	G	G	G	C	G	G	G	G	G	G	G	G	G	G	G	G	C	C	G	G	G	G	G	G	G	G	C	C	G	G	C
DELTA_15_vs._23	909	-1293	SNP							T	T	C	C	C	T	C	T	T	T	T	T	C	T	T	T	T	T	T	T	T	T	T	T	T	C	C	T	T	T	T	T	T	T	T	C	C	T	T	C
DELTA_15_vs._23	958	-1244	SNP							T	T	G	C	G	T	G	T	T	T	T	T	C	T	T	T	T	T	T	T	T	T	T	T	T	C	C	T	T	T	T	T	T	T	T	C	C	T	T	G
DELTA_15_vs._23	975	-1227	INDEL_DEL_975_976							GA	GA	GA	GA	GA	GA	GA	GA	GA	GA	GA	GA	GA	GA	GA	GA	GA	GA	GA	GA	GA	GA	GA	GA	GA	GA	GA	--	GA	GA	GA	GA	GA	GA	GA	GA	GA	GA	GA	GA
DELTA_15_vs._23	1007	-1195	INDEL_DEL_1007_1008							T-	T-	TT	TT	--	T-	TT	TT	TT	TT	T-	TT	TT	TT	TT	TT	TT	TT	TT	TT	TT	TT	TT	TT	TT	T-	TT	TT	TT	TT	TT	TT	T-	TT	TT	T-	T-	T-	TT	--
DELTA_15_vs._23	1008	-1194	INDEL_DEL_1008_1008							-	-	T	T	-	-	T	T	T	T	-	T	T	T	T	T	T	T	T	T	T	T	T	T	T	-	T	T	T	T	T	T	-	T	T	-	-	-	T	-
DELTA_15_vs._23	1150	-1052	SNP							A	T	A	A	A	T	A	T	A	T	T	A	A	A	A	A	A	A	A	A	A	A	A	A	A	A	A	A	A	A	A	T	T	A	A	A	A	T	T	A
DELTA_15_vs._23	1191	-1011	SNP							G	G	G	G	G	G	G	G	G	G	G	G	G	G	G	G	G	G	G	G	G	G	G	G	G	C	G	G	G	G	G	G	G	G	G	G	G	G	G	G
DELTA_15_vs._23	1223	-979	SNP							A	A	A	A	A	A	A	A	A	A	A	A	A	A	A	A	A	A	A	A	A	A	A	A	A	A	A	A	A	A	G	A	A	G	A	A	A	A	A	A
DELTA_15_vs._23	1228	-974	SNP							A	A	A	A	A	A	A	A	A	A	A	A	A	A	A	A	A	A	A	G	A	A	A	A	A	A	A	A	A	A	A	A	A	A	A	A	A	A	A	A
DELTA_15_vs._23	1321	-881	SNP							G	G	G	G	G	G	G	G	G	G	G	G	G	G	G	G	G	G	G	G	G	G	G	G	G	G	G	G	G	G	T	G	G	T	G	G	G	G	G	G
DELTA_15_vs._23	1354	-848	SNP							G	G	G	G	G	G	G	G	G	G	G	G	G	G	G	G	G	T	T	G	T	T	G	T	T	G	G	T	G	G	G	G	G	G	G	G	G	G	G	G
DELTA_15_vs._23	1364	-838	SNP							A	A	A	A	A	A	A	A	G	A	A	G	A	A	A	A	A	A	A	A	A	A	G	A	A	A	A	A	A	G	A	A	A	A	G	A	A	A	A	A
DELTA_15_vs._23	1404	-798	SNP							G	G	G	G	G	G	G	G	G	G	G	G	G	G	G	G	G	G	G	G	T	T	G	T	T	G	G	T	G	G	G	G	G	G	G	G	G	G	G	G
DELTA_15_vs._23	1656	-546	SNP							G	G	G	A	G	G	G	G	G	G	G	G	A	G	G	G	G	G	G	G	G	G	G	G	G	G	G	G	G	G	G	G	G	G	G	G	G	G	G	G
DELTA_15_vs._23	1734	-468	SNP							C	C	C	C	C	C	C	C	C	C	C	C	C	C	C	C	C	C	C	C	C	C	C	C	C	C	C	C	C	C	T	C	C	T	C	C	C	C	C	C
DELTA_15_vs._23	1832	-370	SNP							C	T	C	C	C	T	C	T	C	T	T	C	C	C	C	C	C	C	C	C	C	C	C	C	C	C	C	C	C	C	C	T	T	C	C	C	C	T	T	C
DELTA_15_vs._23	1861	-341	SNP							A	A	A	A	A	A	A	A	A	A	A	A	A	A	G	A	A	A	A	A	A	A	A	A	A	A	A	A	A	A	A	A	A	A	A	A	A	A	A	A
DELTA_15_vs._23	1986	-216	INDEL_DEL_1986_1986							T	T	T	-	T	T	T	T	T	T	T	T	-	T	T	T	T	-	-	T	-	-	T	-	-	-	T	-	T	T	T	T	T	T	T	T	T	T	T	T
DELTA_15_vs._23	1994	-208	SNP							A	A	A	A	A	A	A	A	A	A	A	A	A	A	A	A	A	A	A	A	A	A	A	A	A	A	A	A	A	A	A	A	T	A	A	A	A	A	A	A
DELTA_15_vs._23	2030	-172	INDEL_DEL_2030_2030							A	-	-	-	-	-	-	-	-	-	-	-	-	-	-	-	-	-	-	-	-	-	-	-	-	-	-	-	-	-	-	-	-	-	-	-	-	-	-	-
DELTA_15_vs._23	2042	-160	SNP							C	C	T	C	T	C	T	C	C	C	C	C	C	C	C	C	C	C	C	C	C	C	C	C	C	C	C	C	C	C	C	C	C	C	C	C	C	C	C	T
DELTA_15_vs._23	2100	-102	SNP							G	A	A	A	A	A	A	A	A	A	A	A	A	G	G	G	G	A	A	A	A	A	A	A	A	A	A	A	G	A	A	A	A	A	A	A	A	A	A	A
DELTA_15_vs._23	2103	-99	SNP							T	A	A	A	A	A	A	A	A	A	A	A	A	T	T	T	T	A	A	A	A	A	A	A	A	A	A	A	T	A	A	A	A	A	A	A	A	A	A	A
DELTA_15_vs._23	2109	-93	SNP							A	A	A	C	A	A	A	A	A	A	A	A	C	A	A	A	A	C	C	C	C	C	A	C	C	C	C	C	A	A	C	A	A	C	A	C	C	A	A	A
DELTA_15_vs._23	2197	-5	SNP							A	A	A	A	A	A	A	A	A	A	A	A	A	A	A	A	A	A	A	C	A	A	A	A	A	A	C	A	A	A	A	A	A	A	A	C	C	A	A	A
DELTA_15_vs._23	2373	171	SNP							C	C	C	C	C	C	C	C	C	C	C	C	C	C	C	C	C	C	C	C	C	C	C	C	C	C	C	C	C	C	C	C	C	C	C	C	C	C	C	C
DELTA_15_vs._23	2386	184	SNP							G	G	G	G	G	G	G	G	G	G	G	G	G	G	G	G	G	G	G	G	G	G	G	G	G	G	G	G	G	G	G	G	G	G	G	G	G	G	G	G
DELTA_15_vs._23	2394	192	SNP							A	A	T	T	T	A	T	A	A	A	A	A	T	A	A	A	A	T	T	A	T	T	A	T	T	T	T	T	A	A	A	A	A	A	A	A	A	A	A	T
DELTA_15_vs._23	2488	286	SNP							G	G	G	G	G	G	G	G	G	G	G	G	G	G	G	G	G	T	T	G	T	T	G	T	T	G	G	T	G	G	G	G	G	G	G	G	G	G	G	G
DELTA_15_vs._23	2535	333	SNP							A	A	A	A	A	A	A	A	A	A	A	A	A	A	A	A	A	A	A	A	A	A	A	G	A	A	A	G	A	A	A	A	A	A	A	A	A	A	A	A
DELTA_15_vs._23	2554	352	SNP							T	T	T	T	T	T	T	T	T	T	T	T	T	T	T	T	T	T	T	G	T	T	T	T	T	T	T	T	T	T	T	T	T	T	T	T	T	T	T	T
DELTA_15_vs._23	2583	381	SNP							G	G	G	G	G	G	G	G	C	G	G	C	G	G	G	G	G	G	G	G	G	G	C	G	G	G	G	G	G	C	G	G	G	G	C	G	G	G	G	G
DELTA_15_vs._23	2614	412	SNP							G	A	G	G	G	A	G	A	G	A	A	G	G	G	G	G	G	G	G	G	G	G	G	G	G	G	G	G	G	G	G	A	A	G	G	G	G	A	A	G
DELTA_15_vs._23	2623	421	SNP							T	T	T	T	T	T	T	T	T	T	T	T	T	T	T	T	T	C	T	T	T	T	T	T	-	T	T	T	T	T	T	T	T	T	T	T	T	T	T	T
DELTA_15_vs._23	2624	422	SNP							T	-	T	T	T	-	T	-	T	-	-	T	T	T	T	T	T	G	T	T	T	T	T	T	-	T	T	T	T	T	T	-	-	T	T	T	T	-	-	T
DELTA_15_vs._23	2624	422	INDEL_DEL_2624_2624							T	-	T	T	T	-	T	-	T	-	-	T	T	T	T	T	T	G	T	T	T	T	T	T	-	T	T	T	T	T	T	-	-	T	T	T	T	-	-	T
DELTA_15_vs._23	2625	423	SNP							C	C	C	C	C	C	C	C	C	C	C	C	C	C	C	C	C	T	C	C	C	C	C	C	-	C	C	C	C	C	C	C	C	C	C	C	C	C	C	C
DELTA_15_vs._23	2628	426	SNP							G	G	G	G	G	G	G	G	G	G	G	G	G	G	G	G	G	T	T	G	G	G	G	G	-	G	G	G	G	G	G	G	G	G	G	G	G	G	G	G
DELTA_15_vs._23	2639	437	INDEL_DEL_2639_2640							TT	T-	TT	TT	TT	T-	T-	T-	TT	TT	T-	TT	TT	TT	TT	TT	TT	--	--	TT	TT	TT	TT	TT	--	TT	TT	TT	TT	TT	TT	TT	T-	TT	TT	TT	TT	T-	TT	TT
DELTA_15_vs._23	2640	438	INDEL_DEL_2640_2641							TT	--	TT	TT	TT	--	--	--	TT	TT	--	TT	TT	T-	TT	TT	TT	--	--	TT	T-	T-	TT	TT	--	TT	TT	TT	TT	TT	TT	TT	--	TT	TT	TT	TT	--	TT	TT
DELTA_15_vs._23	2641	439	INDEL_DEL_2641_2641							T	-	T	T	T	-	-	-	T	T	-	T	T	-	T	T	T	-	-	T	-	-	T	T	-	T	T	T	T	T	T	T	-	T	T	T	T	-	T	T
DELTA_15_vs._23	2666	464	SNP							C	C	C	C	C	C	C	C	T	C	C	T	C	T	T	T	T	C	C	C	C	C	T	C	C	C	C	C	T	T	C	C	C	C	T	C	C	C	C	C
DELTA_15_vs._23	2765	563	SNP							C	C	C	C	C	C	C	C	G	C	C	G	C	G	G	G	G	C	C	C	C	C	G	C	C	C	C	C	G	G	C	C	C	C	G	C	C	C	C	C
DELTA_15_vs._23	2839	637	SNP							A	A	A	A	A	A	A	A	C	A	A	C	A	C	C	C	C	A	A	A	A	A	C	A	A	A	A	A	C	C	A	A	A	A	C	A	A	A	A	A
DELTA_15_vs._23	3079	877	SNP							A	A	A	A	A	A	A	A	A	A	A	A	A	A	A	A	A	A	A	A	A	A	A	A	A	A	A	A	A	A	A	A	A	A	A	A	A	T	A	A
DELTA_15_vs._23	3097	895	SNP							C	C	C	C	C	C	C	C	C	C	C	C	C	C	C	C	C	T	T	C	T	T	C	T	T	C	C	T	C	C	C	C	C	C	C	C	C	C	C	C
DELTA_15_vs._23	3145	943	SNP							C	C	C	C	C	C	C	C	C	C	C	C	C	C	C	C	C	C	C	C	C	C	C	C	C	C	C	C	C	C	C	C	C	C	C	C	C	C	C	C
DELTA_15_vs._23	3288	1086	SNP							A	G	A	A	A	G	A	G	A	G	G	A	A	A	A	A	A	A	A	A	A	A	A	A	A	A	A	A	A	A	A	G	G	A	A	A	A	G	G	A
DELTA_15_vs._23	3332	1130	SNP							A	A	A	G	A	A	A	A	A	A	A	A	G	A	A	A	A	A	A	G	A	A	A	A	A	G	G	A	A	A	G	A	A	G	A	G	G	A	A	A
DELTA_15_vs._23	3503	1301	INDEL_DEL_3503_3503							-	-	-	C	-	-	-	-	-	-	-	-	C	-	-	-	-	-	-	-	-	-	-	-	-	-	-	-	-	-	-	-	-	-	-	-	-	-	-	-
DELTA_15_vs._23	3505	1303	INDEL_DEL_3505_3505							T	T	T	T	T	T	T	T	T	T	T	T	T	-	-	T	-	T	T	T	T	T	T	T	T	T	T	T	-	T	T	T	T	T	T	T	T	T	T	T
DELTA_15_vs._23	3589	1387	SNP							G	C	C	C	C	C	C	C	C	C	C	C	C	C	C	C	C	C	C	C	C	C	C	C	C	C	C	C	C	C	C	C	C	C	C	C	C	C	C	C
DELTA_15_vs._23	3663	1461	INDEL_DEL_3663_3664							--	--	--	--	--	--	--	--	AA	--	--	AA	--	AA	AA	AA	AA	--	--	--	--	--	AA	--	--	--	--	--	AA	AA	--	--	--	--	AA	--	--	--	--	--
DELTA_15_vs._23	3772	1570	SNP							C	C	C	C	C	C	C	C	C	C	C	C	C	A	C	C	C	C	C	C	C	C	C	C	C	C	C	C	C	C	C	C	C	C	C	C	C	C	C	C
DELTA_15_vs._23	3901	1699	INDEL_DEL_3901_3901							-	-	-	-	-	-	-	-	A	-	-	A	-	-	-	-	-	-	-	-	-	-	A	-	-	-	-	-	-	A	-	-	-	-	A	-	-	-	-	-
DELTA_15_vs._23	3975	1773	SNP							A	A	C	A	C	A	C	A	A	A	A	A	A	A	A	A	A	A	A	A	A	A	A	A	A	A	A	A	A	A	A	A	A	A	A	A	A	A	A	C
DELTA_15_vs._23	4014	1812	SNP							C	G	G	G	G	G	G	G	G	G	G	G	G	G	G	G	G	G	G	G	G	G	G	G	G	G	G	G	G	G	G	G	G	G	G	G	G	G	G	G
DELTA_15_vs._23	4026	1824	SNP							C	C	C	C	C	C	C	C	T	C	C	T	C	T	T	T	T	C	C	C	C	C	T	C	C	C	C	C	T	T	C	C	C	C	T	C	C	C	C	C
DELTA_15_vs._23	4110	1908	SNP							G	G	G	G	G	G	G	G	G	G	G	G	G	G	G	G	G	G	G	G	G	G	G	G	G	A	G	G	G	G	G	G	G	G	G	G	G	G	G	G
DELTA_15_vs._23	4118	1916	SNP							T	G	T	T	T	G	T	G	T	G	G	T	T	T	T	T	T	T	T	T	T	T	T	T	T	T	T	T	T	T	T	G	G	T	T	T	T	G	G	T
DELTA_15_vs._23	4263	2061	SNP							T	T	T	T	T	T	T	T	C	T	T	C	T	C	C	C	C	T	T	T	T	T	C	T	T	T	T	T	C	C	T	T	T	T	C	T	T	T	T	T
DELTA_15_vs._23	4324	2122	SNP							G	G	G	C	G	G	G	G	G	G	G	G	C	G	G	G	G	G	G	G	G	G	G	G	G	G	G	G	G	G	G	G	G	G	G	G	G	G	G	G
DELTA_15_vs._23	4360	2158	SNP							G	G	G	G	G	G	G	G	G	G	G	G	G	G	G	G	G	C	C	G	C	C	G	C	-	G	G	C	G	G	G	G	G	G	G	G	G	G	G	G
DELTA_15_vs._23	4550	2348	INDEL_DEL_4550_4551							--	--	--	TT	--	--	--	--	--	--	--	--	TT	--	--	--	--	--	--	--	--	--	--	--	--	--	--	--	--	--	--	--	--	--	--	--	TT	--	--	--
DELTA_15_vs._23	4682	2480	INDEL_DEL_4682_4682							C	C	C	C	C	C	C	C	C	C	C	C	C	C	C	C	C	C	C	C	C	C	C	C	-	C	-	C	C	C	C	C	C	C	C	C	C	C	C	C
DELTA_15_vs._23	4962	2760	SNP							G	G	G	G	G	G	G	G	G	G	G	G	G	G	G	G	G	G	G	G	G	G	G	G	A	G	G	G	G	G	G	G	G	G	G	G	G	G	G	G
DELTA_15_vs._23	4988	2786	SNP							G	G	G	-	G	G	G	G	G	G	G	G	-	G	G	G	G	G	G	T	T	G	G	-	G	G	G	T	G	G	G	G	G	G	G	-	-	G	G	G
DELTA_15_vs._23	5049	2847	SNP							A	A	A	T	A	A	A	A	A	A	A	A	T	A	A	A	A	A	A	A	A	A	A	A	A	A	A	A	A	A	A	A	A	A	A	A	A	A	A	A
DELTA_15_vs._23	5142	2940	SNP							A	A	A	A	A	A	A	A	A	A	A	A	A	A	A	A	A	A	A	A	A	A	A	A	A	A	A	A	A	A	A	A	A	A	A	T	A	A	A	A
DELTA_15_vs._23	5237	3035	INDEL_DEL_5237_5237							-	-	-	-	-	-	-	-	-	-	-	-	-	-	-	-	-	-	-	-	-	-	-	-	-	-	-	-	-	-	-	-	-	-	A	-	-	-	-	-
DELTA_15_vs._23	5245	3043	SNP							T	T	T	T	T	T	T	T	T	T	T	T	T	T	T	T	T	T	T	T	T	T	T	T	T	T	T	T	T	T	T	T	T	T	T	T	T	T	T	T
DELTA_15_vs._23	5248	3046	INDEL_DEL_5248_5249							--	--	T-	--	T-	--	TT	--	--	--	--	--	--	--	--	--	--	--	--	--	--	--	--	--	--	--	--	--	--	--	--	--	--	--	--	--	--	T-	--	T-
DELTA_15_vs._23	5249	3047	INDEL_DEL_5249_5249							-	-	-	-	-	-	T	-	-	-	-	-	-	-	-	-	-	-	-	-	-	-	-	-	-	-	-	-	-	-	-	-	-	-	-	-	-	-	-	-
DELTA_15_vs._23	5496	3294	SNP							G	G	G	G	G	G	G	G	G	G	G	G	G	A	A	A	A	G	G	G	G	G	G	G	G	G	G	G	A	G	G	G	G	G	G	G	G	G	G	G
DELTA_15_vs._23	5517	3315	SNP							G	G	G	G	G	G	G	G	G	G	G	G	G	G	G	G	G	G	G	G	G	G	G	G	G	G	G	G	G	G	G	G	G	G	G	G	G	G	G	G
DELTA_15_vs._23	5573	3371	SNP							T	T	T	T	T	T	T	T	T	T	T	T	T	T	T	T	T	T	T	T	A	T	T	-	T	T	T	T	T	T	T	T	T	T	T	T	T	T	T	T
DELTA_15_vs._23	5614	3412	SNP							T	T	T	T	T	T	T	T	T	T	A	T	T	T	T	T	T	T	T	-	T	T	T	T	T	-	-	T	T	T	T	T	T	T	T	T	T	T	T	T
DELTA_15_vs._23	5633	3431	INDEL_DEL_5633_5634							--	--	--	--	--	--	--	--	--	--	--	--	--	--	--	--	--	--	--	--	--	--	--	--	--	--	--	--	--	--	--	--	--	--	AT	--	--	--	--	--
DELTA_15_vs._23	5980	3778	INDEL_DEL_5980_5980							-	-	-	-	-	-	-	-	-	-	-	-	-	-	-	-	-	-	-	-	-	-	-	-	-	-	-	-	-	-	-	-	-	-	-	-	-	-	-	-
DELTA_15_vs._23	6126	3924	SNP							T	T	T	T	T	T	T	T	T	T	T	T	T	C	C	C	C	T	T	T	T	T	T	T	T	T	T	T	C	T	T	T	T	T	T	T	T	T	T	T
DELTA_15_vs._23	6166	3964	SNP							T	T	A	T	A	T	A	T	T	T	T	T	T	T	T	T	T	T	T	T	T	T	T	T	T	T	T	T	T	T	T	T	T	T	T	T	T	A	T	A
DELTA_15_vs._23	6184	3982	SNP							A	A	C	A	C	A	C	A	A	A	A	A	A	C	C	C	C	A	A	A	A	A	A	A	A	A	A	A	C	A	A	A	A	A	A	A	A	C	A	C
DELTA_15_vs._23	6185	3983	SNP							A	C	A	C	A	C	A	C	A	C	C	A	C	A	A	A	A	C	C	C	C	A	A	C	C	C	C	C	A	A	A	C	C	A	A	C	C	A	C	A
DELTA_15_vs._23	6186	3984	SNP							A	A	C	A	C	A	C	A	T	A	A	T	A	A	A	A	A	A	A	A	A	A	T	A	A	A	A	A	A	T	A	A	A	A	T	A	A	C	A	C
DELTA_15_vs._23	6352	4150	SNP							G	G	G	G	G	G	G	G	G	G	G	G	G	A	A	A	A	G	G	G	G	G	G	G	G	G	G	G	A	G	G	G	G	G	G	G	G	G	G	G
DELTA_15_vs._23	6374	4172	INDEL_DEL_6374_6374							T	T	T	T	T	T	T	T	T	T	T	T	T	T	T	T	-	T	T	T	T	T	T	T	T	T	T	T	-	T	T	T	T	T	T	T	T	T	T	T
DELTA_15_vs._23	6455	4253	SNP							A	A	A	A	A	A	A	A	A	A	A	A	A	A	A	A	A	A	A	A	G	G	A	A	A	A	A	A	A	A	A	A	A	A	A	A	A	A	A	A
DELTA_15_vs._23	6571	4369	INDEL_DEL_6571_6571							T	T	T	T	T	T	T	T	T	T	T	T	T	T	T	T	T	T	T	T	T	T	T	T	T	-	T	T	T	T	T	T	T	T	T	T	T	T	T	T
DELTA_15_vs._23	6656	4454	INDEL_DEL_6656_6656							T	T	T	T	T	T	T	T	T	T	T	T	T	T	T	T	T	T	-	T	T	T	T	T	T	T	T	T	T	T	T	T	T	T	T	T	T	T	T	T
DELTA_15_vs._23	6658	4456	SNP							T	T	T	T	T	T	T	T	T	T	C	T	T	T	T	T	T	T	T	T	T	T	T	T	T	T	T	T	T	T	T	T	T	T	T	T	T	T	T	T
DELTA_15_vs._23	6667	4465	SNP							T	T	T	T	T	T	T	T	T	T	T	T	T	T	T	T	T	T	T	T	T	T	T	T	T	T	T	T	T	T	T	T	T	A	T	T	T	T	T	T
DELTA_15_vs._23	6668	4466	INDEL_DEL_6668_6668							T	T	T	T	T	T	T	T	T	T	T	T	T	T	T	T	T	T	T	T	T	T	T	T	T	T	T	T	T	T	T	-	T	T	T	T	T	T	T	T
DELTA_15_vs._23	6681	4479	INDEL_DEL_6681_6681							T	T	-	-	T	T	T	T	T	T	-	T	-	T	T	T	T	T	-	T	T	-	T	T	T	T	T	-	T	T	T	T	-	T	T	T	-	T	-	T
DELTA_15_vs._23	6826	4624	INDEL_DEL_6826_6827							AT	AT	AT	AT	AT	AT	AT	AT	AT	AT	AT	AT	AT	AT	AT	AT	AT	--	AT	AT	AT	AT	AT	AT	AT	AT	AT	AT	AT	AT	AT	AT	AT	AT	AT	AT	AT	AT	AT	AT
DELTA_15_vs._23	6830	4628	SNP							G	G	G	G	G	G	G	G	G	G	G	G	G	A	A	A	A	G	G	G	G	G	G	G	G	G	G	G	A	G	G	G	G	G	G	G	G	G	G	G
BETA_15_vs_23	49	-2153	SNP							A	A	C	C	C	A	C	A	A	A	A	A	C	A	A	A	A	C	C	A	C	C	A	C	C	C	C	C	A	A	A	A	A	A	A	C	C	A	A	C
BETA_15_vs_23	85	-2117	SNP							T	T	T	T	T	T	T	T	T	T	T	T	T	T	T	T	T	T	T	T	T	T	T	T	T	T	T	T	T	T	T	T	T	T	T	T	T	T	T	T
BETA_15_vs_23	111	-2091	SNP							C	C	C	C	C	C	C	C	C	C	C	C	C	C	C	C	C	C	C	G	C	C	C	C	C	C	C	C	C	C	C	C	C	C	C	C	C	C	C	C
BETA_15_vs_23	119	-2083	SNP							T	T	G	G	G	T	G	T	T	T	T	T	G	T	T	T	T	G	G	T	G	G	T	G	G	G	G	G	T	T	T	T	T	T	T	G	G	T	T	G
BETA_15_vs_23	183	-2019	SNP							A	G	A	A	A	G	A	G	A	G	G	A	A	A	A	A	A	A	A	A	A	A	A	A	A	A	A	A	A	A	A	G	G	A	A	A	A	G	G	A
BETA_15_vs_23	202	-2000	SNP							A	C	C	C	C	C	C	C	C	C	C	C	C	A	A	A	A	C	C	C	C	C	C	C	C	C	C	C	A	C	C	C	C	C	C	C	C	C	C	C
BETA_15_vs_23	216	-1986	SNP							G	A	A	A	A	A	A	A	A	A	A	A	A	G	G	G	G	A	A	A	A	A	A	A	A	A	A	A	G	A	A	A	A	A	A	A	A	A	A	A
BETA_15_vs_23	222	-1980	SNP							G	A	A	A	A	A	A	A	A	A	A	A	A	G	G	G	G	A	A	A	A	A	A	A	A	A	A	A	G	A	A	A	A	A	A	A	A	A	A	A
BETA_15_vs_23	264	-1938	SNP							C	C	C	C	C	C	C	C	C	C	C	C	C	T	T	T	T	C	C	C	C	C	C	C	C	C	C	C	T	C	C	C	C	C	C	C	C	C	C	C
BETA_15_vs_23	374	-1828	INDEL_DEL_374_374							T	T	T	T	T	T	T	T	T	T	T	T	T	T	T	T	T	T	T	T	T	T	T	T	T	T	-	T	T	T	T	T	T	T	T	T	T	T	T	T
BETA_15_vs_23	417	-1785	SNP							G	G	G	G	G	G	G	G	G	G	G	G	G	G	G	G	G	C	C	G	C	C	G	C	G	G	G	C	G	G	G	G	G	G	G	G	G	G	G	G
BETA_15_vs_23	453	-1749	SNP							T	G	G	G	G	G	G	G	G	G	G	G	G	G	G	G	G	G	G	G	G	G	G	G	G	G	G	G	G	G	G	G	G	G	G	G	G	G	G	G
BETA_15_vs_23	469	-1733	SNP							C	A	C	C	C	A	C	A	C	A	A	C	C	C	C	C	C	C	C	C	C	C	C	C	C	C	C	C	C	C	C	A	A	C	C	C	C	A	A	C
BETA_15_vs_23	547	-1655	SNP							C	C	C	C	C	C	C	C	C	C	C	C	C	C	C	C	C	C	C	C	C	C	C	C	C	C	C	C	C	C	C	C	C	C	G	C	C	C	C	C
BETA_15_vs_23	628	-1574	SNP							G	A	A	A	A	A	A	A	A	A	A	A	A	A	A	A	A	A	A	A	A	A	A	A	A	A	A	A	A	A	A	A	A	A	A	A	A	A	A	A
BETA_15_vs_23	650	-1552	SNP							G	A	A	A	A	A	A	A	G	A	A	G	A	G	G	G	G	A	A	A	A	A	G	A	A	A	A	A	G	G	A	A	A	A	G	A	A	A	A	A
BETA_15_vs_23	662	-1540	SNP							A	A	T	T	T	A	T	A	T	A	A	T	T	T	T	C	T	A	A	A	A	A	T	A	T	T	A	A	T	T	A	A	A	A	T	T	T	A	A	T
BETA_15_vs_23	667	-1535	SNP							T	T	T	T	T	T	T	T	T	T	T	T	T	-	G	-	-	T	T	T	T	T	T	T	T	T	T	T	-	T	T	T	T	T	T	T	T	T	T	T
BETA_15_vs_23	736	-1466	INDEL_DEL_736_736							A	A	A	A	A	A	A	A	A	A	A	A	A	-	-	-	-	A	A	A	A	A	A	A	A	A	A	A	-	A	A	A	A	A	A	A	A	A	A	A
BETA_15_vs_23	755	-1447	SNP							G	G	G	G	G	G	G	G	G	G	G	G	G	G	G	G	A	G	G	G	G	G	G	G	G	G	G	G	G	G	G	G	G	G	G	G	G	G	G	G
BETA_15_vs_23	781	-1421	SNP							T	T	T	T	T	T	T	T	T	T	T	T	T	T	T	T	T	T	T	T	T	T	T	T	T	T	T	C	T	T	T	T	T	T	T	T	T	T	T	T
BETA_15_vs_23	832	-1370	INDEL_DEL_832_832							A	A	A	-	-	A	-	A	A	A	A	A	-	A	A	A	A	A	A	A	A	A	A	A	A	-	-	A	A	A	A	A	A	A	A	-	-	A	A	-
BETA_15_vs_23	833	-1369	SNP							A	A	T	T	T	A	T	A	A	A	A	A	T	A	A	A	A	A	A	A	A	A	A	A	A	T	T	A	A	A	A	A	A	A	A	T	T	A	A	T
BETA_15_vs_23	891	-1311	SNP							G	G	C	C	C	G	C	G	G	G	G	G	C	G	G	G	G	G	G	G	G	G	G	G	G	C	C	G	G	G	G	G	G	G	G	C	C	G	G	C
BETA_15_vs_23	909	-1293	SNP							T	T	C	C	C	T	C	T	T	T	T	T	C	T	T	T	T	T	T	T	T	T	T	T	T	C	C	T	T	T	T	T	T	T	T	C	C	T	T	C
BETA_15_vs_23	958	-1244	SNP							T	T	G	C	G	T	G	T	T	T	T	T	C	T	T	T	T	T	T	T	T	T	T	T	T	C	C	T	T	T	T	T	T	T	T	C	C	T	T	G
BETA_15_vs_23	975	-1227	INDEL_DEL_975_976							GA	GA	GA	GA	GA	GA	GA	GA	GA	GA	GA	GA	GA	GA	GA	GA	GA	GA	GA	GA	GA	GA	GA	GA	GA	GA	GA	--	GA	GA	GA	GA	GA	GA	GA	GA	GA	GA	GA	GA
BETA_15_vs_23	1007	-1195	INDEL_DEL_1007_1008							T-	T-	TT	TT	--	T-	TT	TT	TT	TT	T-	TT	TT	TT	TT	TT	TT	TT	TT	TT	TT	TT	TT	TT	TT	T-	TT	TT	TT	TT	TT	TT	T-	TT	TT	T-	T-	T-	TT	--
BETA_15_vs_23	1008	-1194	INDEL_DEL_1008_1008							-	-	T	T	-	-	T	T	T	T	-	T	T	T	T	T	T	T	T	T	T	T	T	T	T	-	T	T	T	T	T	T	-	T	T	-	-	-	T	-
BETA_15_vs_23	1150	-1052	SNP							A	T	A	A	A	T	A	T	A	T	T	A	A	A	A	A	A	A	A	A	A	A	A	A	A	A	A	A	A	A	A	T	T	A	A	A	A	T	T	A
BETA_15_vs_23	1191	-1011	SNP							G	G	G	G	G	G	G	G	G	G	G	G	G	G	G	G	G	G	G	G	G	G	G	G	G	C	G	G	G	G	G	G	G	G	G	G	G	G	G	G
BETA_15_vs_23	1223	-979	SNP							A	A	A	A	A	A	A	A	A	A	A	A	A	A	A	A	A	A	A	A	A	A	A	A	A	A	A	A	A	A	G	A	A	G	A	A	A	A	A	A
BETA_15_vs_23	1228	-974	SNP							A	A	A	A	A	A	A	A	A	A	A	A	A	A	A	A	A	A	A	G	A	A	A	A	A	A	A	A	A	A	A	A	A	A	A	A	A	A	A	A
BETA_15_vs_23	1321	-881	SNP							G	G	G	G	G	G	G	G	G	G	G	G	G	G	G	G	G	G	G	G	G	G	G	G	G	G	G	G	G	G	T	G	G	T	G	G	G	G	G	G
BETA_15_vs_23	1354	-848	SNP							G	G	G	G	G	G	G	G	G	G	G	G	G	G	G	G	G	T	T	G	T	T	G	T	T	G	G	T	G	G	G	G	G	G	G	G	G	G	G	G
BETA_15_vs_23	1364	-838	SNP							A	A	A	A	A	A	A	A	G	A	A	G	A	A	A	A	A	A	A	A	A	A	G	A	A	A	A	A	A	G	A	A	A	A	G	A	A	A	A	A
BETA_15_vs_23	1404	-798	SNP							G	G	G	G	G	G	G	G	G	G	G	G	G	G	G	G	G	G	G	G	T	T	G	T	T	G	G	T	G	G	G	G	G	G	G	G	G	G	G	G
BETA_15_vs_23	1656	-546	SNP							G	G	G	A	G	G	G	G	G	G	G	G	A	G	G	G	G	G	G	G	G	G	G	G	G	G	G	G	G	G	G	G	G	G	G	G	G	G	G	G
BETA_15_vs_23	1734	-468	SNP							C	C	C	C	C	C	C	C	C	C	C	C	C	C	C	C	C	C	C	C	C	C	C	C	C	C	C	C	C	C	T	C	C	T	C	C	C	C	C	C
BETA_15_vs_23	1832	-370	SNP							C	T	C	C	C	T	C	T	C	T	T	C	C	C	C	C	C	C	C	C	C	C	C	C	C	C	C	C	C	C	C	T	T	C	C	C	C	T	T	C
BETA_15_vs_23	1861	-341	SNP							A	A	A	A	A	A	A	A	A	A	A	A	A	A	G	A	A	A	A	A	A	A	A	A	A	A	A	A	A	A	A	A	A	A	A	A	A	A	A	A
BETA_15_vs_23	1986	-216	INDEL_DEL_1986_1986							T	T	T	-	T	T	T	T	T	T	T	T	-	T	T	T	T	-	-	T	-	-	T	-	-	-	T	-	T	T	T	T	T	T	T	T	T	T	T	T
BETA_15_vs_23	1994	-208	SNP							A	A	A	A	A	A	A	A	A	A	A	A	A	A	A	A	A	A	A	A	A	A	A	A	A	A	A	A	A	A	A	A	T	A	A	A	A	A	A	A
BETA_15_vs_23	2030	-172	INDEL_DEL_2030_2030							A	-	-	-	-	-	-	-	-	-	-	-	-	-	-	-	-	-	-	-	-	-	-	-	-	-	-	-	-	-	-	-	-	-	-	-	-	-	-	-
BETA_15_vs_23	2042	-160	SNP							C	C	T	C	T	C	T	C	C	C	C	C	C	C	C	C	C	C	C	C	C	C	C	C	C	C	C	C	C	C	C	C	C	C	C	C	C	C	C	T
BETA_15_vs_23	2100	-102	SNP							G	A	A	A	A	A	A	A	A	A	A	A	A	G	G	G	G	A	A	A	A	A	A	A	A	A	A	A	G	A	A	A	A	A	A	A	A	A	A	A
BETA_15_vs_23	2103	-99	SNP							T	A	A	A	A	A	A	A	A	A	A	A	A	T	T	T	T	A	A	A	A	A	A	A	A	A	A	A	T	A	A	A	A	A	A	A	A	A	A	A
BETA_15_vs_23	2109	-93	SNP							A	A	A	C	A	A	A	A	A	A	A	A	C	A	A	A	A	C	C	C	C	C	A	C	C	C	C	C	A	A	C	A	A	C	A	C	C	A	A	A
BETA_15_vs_23	2197	-5	SNP							A	A	A	A	A	A	A	A	A	A	A	A	A	A	A	A	A	A	A	C	A	A	A	A	A	A	C	A	A	A	A	A	A	A	A	C	C	A	A	A
BETA_15_vs_23	2373	171	SNP							C	C	C	C	C	C	C	C	C	C	C	C	C	C	C	C	C	C	C	C	C	C	C	C	C	C	C	C	C	C	C	C	C	C	C	C	C	C	C	C
BETA_15_vs_23	2386	184	SNP							G	G	G	G	G	G	G	G	G	G	G	G	G	G	G	G	G	G	G	G	G	G	G	G	G	G	G	G	G	G	G	G	G	G	G	G	G	G	G	G
BETA_15_vs_23	2394	192	SNP							A	A	T	T	T	A	T	A	A	A	A	A	T	A	A	A	A	T	T	A	T	T	A	T	T	T	T	T	A	A	A	A	A	A	A	A	A	A	A	T
BETA_15_vs_23	2488	286	SNP							G	G	G	G	G	G	G	G	G	G	G	G	G	G	G	G	G	T	T	G	T	T	G	T	T	G	G	T	G	G	G	G	G	G	G	G	G	G	G	G
BETA_15_vs_23	2535	333	SNP							A	A	A	A	A	A	A	A	A	A	A	A	A	A	A	A	A	A	A	A	A	A	A	G	A	A	A	G	A	A	A	A	A	A	A	A	A	A	A	A
BETA_15_vs_23	2554	352	SNP							T	T	T	T	T	T	T	T	T	T	T	T	T	T	T	T	T	T	T	G	T	T	T	T	T	T	T	T	T	T	T	T	T	T	T	T	T	T	T	T
BETA_15_vs_23	2583	381	SNP							G	G	G	G	G	G	G	G	C	G	G	C	G	G	G	G	G	G	G	G	G	G	C	G	G	G	G	G	G	C	G	G	G	G	C	G	G	G	G	G
BETA_15_vs_23	2614	412	SNP							G	A	G	G	G	A	G	A	G	A	A	G	G	G	G	G	G	G	G	G	G	G	G	G	G	G	G	G	G	G	G	A	A	G	G	G	G	A	A	G
BETA_15_vs_23	2623	421	SNP							T	T	T	T	T	T	T	T	T	T	T	T	T	T	T	T	T	C	T	T	T	T	T	T	-	T	T	T	T	T	T	T	T	T	T	T	T	T	T	T
BETA_15_vs_23	2624	422	SNP							T	-	T	T	T	-	T	-	T	-	-	T	T	T	T	T	T	G	T	T	T	T	T	T	-	T	T	T	T	T	T	-	-	T	T	T	T	-	-	T
BETA_15_vs_23	2624	422	INDEL_DEL_2624_2624							T	-	T	T	T	-	T	-	T	-	-	T	T	T	T	T	T	G	T	T	T	T	T	T	-	T	T	T	T	T	T	-	-	T	T	T	T	-	-	T
BETA_15_vs_23	2625	423	SNP							C	C	C	C	C	C	C	C	C	C	C	C	C	C	C	C	C	T	C	C	C	C	C	C	-	C	C	C	C	C	C	C	C	C	C	C	C	C	C	C
BETA_15_vs_23	2628	426	SNP							G	G	G	G	G	G	G	G	G	G	G	G	G	G	G	G	G	T	T	G	G	G	G	G	-	G	G	G	G	G	G	G	G	G	G	G	G	G	G	G
BETA_15_vs_23	2639	437	INDEL_DEL_2639_2640							TT	T-	TT	TT	TT	T-	T-	T-	TT	TT	T-	TT	TT	TT	TT	TT	TT	--	--	TT	TT	TT	TT	TT	--	TT	TT	TT	TT	TT	TT	TT	T-	TT	TT	TT	TT	T-	TT	TT
BETA_15_vs_23	2640	438	INDEL_DEL_2640_2641							TT	--	TT	TT	TT	--	--	--	TT	TT	--	TT	TT	T-	TT	TT	TT	--	--	TT	T-	T-	TT	TT	--	TT	TT	TT	TT	TT	TT	TT	--	TT	TT	TT	TT	--	TT	TT
BETA_15_vs_23	2641	439	INDEL_DEL_2641_2641							T	-	T	T	T	-	-	-	T	T	-	T	T	-	T	T	T	-	-	T	-	-	T	T	-	T	T	T	T	T	T	T	-	T	T	T	T	-	T	T
BETA_15_vs_23	2666	464	SNP							C	C	C	C	C	C	C	C	T	C	C	T	C	T	T	T	T	C	C	C	C	C	T	C	C	C	C	C	T	T	C	C	C	C	T	C	C	C	C	C
BETA_15_vs_23	2765	563	SNP							C	C	C	C	C	C	C	C	G	C	C	G	C	G	G	G	G	C	C	C	C	C	G	C	C	C	C	C	G	G	C	C	C	C	G	C	C	C	C	C
BETA_15_vs_23	2839	637	SNP							A	A	A	A	A	A	A	A	C	A	A	C	A	C	C	C	C	A	A	A	A	A	C	A	A	A	A	A	C	C	A	A	A	A	C	A	A	A	A	A
BETA_15_vs_23	3079	877	SNP							A	A	A	A	A	A	A	A	A	A	A	A	A	A	A	A	A	A	A	A	A	A	A	A	A	A	A	A	A	A	A	A	A	A	A	A	A	T	A	A
BETA_15_vs_23	3097	895	SNP							C	C	C	C	C	C	C	C	C	C	C	C	C	C	C	C	C	T	T	C	T	T	C	T	T	C	C	T	C	C	C	C	C	C	C	C	C	C	C	C
BETA_15_vs_23	3145	943	SNP							C	C	C	C	C	C	C	C	C	C	C	C	C	C	C	C	C	C	C	C	C	C	C	C	C	C	C	C	C	C	C	C	C	C	C	C	C	C	C	C
BETA_15_vs_23	3288	1086	SNP							A	G	A	A	A	G	A	G	A	G	G	A	A	A	A	A	A	A	A	A	A	A	A	A	A	A	A	A	A	A	A	G	G	A	A	A	A	G	G	A
BETA_15_vs_23	3332	1130	SNP							A	A	A	G	A	A	A	A	A	A	A	A	G	A	A	A	A	A	A	G	A	A	A	A	A	G	G	A	A	A	G	A	A	G	A	G	G	A	A	A
BETA_15_vs_23	3503	1301	INDEL_DEL_3503_3503							-	-	-	C	-	-	-	-	-	-	-	-	C	-	-	-	-	-	-	-	-	-	-	-	-	-	-	-	-	-	-	-	-	-	-	-	-	-	-	-
BETA_15_vs_23	3505	1303	INDEL_DEL_3505_3505							T	T	T	T	T	T	T	T	T	T	T	T	T	-	-	T	-	T	T	T	T	T	T	T	T	T	T	T	-	T	T	T	T	T	T	T	T	T	T	T
BETA_15_vs_23	3589	1387	SNP							G	C	C	C	C	C	C	C	C	C	C	C	C	C	C	C	C	C	C	C	C	C	C	C	C	C	C	C	C	C	C	C	C	C	C	C	C	C	C	C
BETA_15_vs_23	3663	1461	INDEL_DEL_3663_3664							--	--	--	--	--	--	--	--	AA	--	--	AA	--	AA	AA	AA	AA	--	--	--	--	--	AA	--	--	--	--	--	AA	AA	--	--	--	--	AA	--	--	--	--	--
BETA_15_vs_23	3772	1570	SNP							C	C	C	C	C	C	C	C	C	C	C	C	C	A	C	C	C	C	C	C	C	C	C	C	C	C	C	C	C	C	C	C	C	C	C	C	C	C	C	C
BETA_15_vs_23	3901	1699	INDEL_DEL_3901_3901							-	-	-	-	-	-	-	-	A	-	-	A	-	-	-	-	-	-	-	-	-	-	A	-	-	-	-	-	-	A	-	-	-	-	A	-	-	-	-	-
BETA_15_vs_23	3975	1773	SNP							A	A	C	A	C	A	C	A	A	A	A	A	A	A	A	A	A	A	A	A	A	A	A	A	A	A	A	A	A	A	A	A	A	A	A	A	A	A	A	C
BETA_15_vs_23	4014	1812	SNP							C	G	G	G	G	G	G	G	G	G	G	G	G	G	G	G	G	G	G	G	G	G	G	G	G	G	G	G	G	G	G	G	G	G	G	G	G	G	G	G
BETA_15_vs_23	4026	1824	SNP							C	C	C	C	C	C	C	C	T	C	C	T	C	T	T	T	T	C	C	C	C	C	T	C	C	C	C	C	T	T	C	C	C	C	T	C	C	C	C	C
BETA_15_vs_23	4110	1908	SNP							G	G	G	G	G	G	G	G	G	G	G	G	G	G	G	G	G	G	G	G	G	G	G	G	G	A	G	G	G	G	G	G	G	G	G	G	G	G	G	G
BETA_15_vs_23	4118	1916	SNP							T	G	T	T	T	G	T	G	T	G	G	T	T	T	T	T	T	T	T	T	T	T	T	T	T	T	T	T	T	T	T	G	G	T	T	T	T	G	G	T
BETA_15_vs_23	4263	2061	SNP							T	T	T	T	T	T	T	T	C	T	T	C	T	C	C	C	C	T	T	T	T	T	C	T	T	T	T	T	C	C	T	T	T	T	C	T	T	T	T	T
BETA_15_vs_23	4324	2122	SNP							G	G	G	C	G	G	G	G	G	G	G	G	C	G	G	G	G	G	G	G	G	G	G	G	G	G	G	G	G	G	G	G	G	G	G	G	G	G	G	G
BETA_15_vs_23	4360	2158	SNP							G	G	G	G	G	G	G	G	G	G	G	G	G	G	G	G	G	C	C	G	C	C	G	C	-	G	G	C	G	G	G	G	G	G	G	G	G	G	G	G
BETA_15_vs_23	4550	2348	INDEL_DEL_4550_4551							--	--	--	TT	--	--	--	--	--	--	--	--	TT	--	--	--	--	--	--	--	--	--	--	--	--	--	--	--	--	--	--	--	--	--	--	--	TT	--	--	--
BETA_15_vs_23	4682	2480	INDEL_DEL_4682_4682							C	C	C	C	C	C	C	C	C	C	C	C	C	C	C	C	C	C	C	C	C	C	C	C	-	C	-	C	C	C	C	C	C	C	C	C	C	C	C	C
BETA_15_vs_23	4962	2760	SNP							G	G	G	G	G	G	G	G	G	G	G	G	G	G	G	G	G	G	G	G	G	G	G	G	A	G	G	G	G	G	G	G	G	G	G	G	G	G	G	G
BETA_15_vs_23	4988	2786	SNP							G	G	G	-	G	G	G	G	G	G	G	G	-	G	G	G	G	G	G	T	T	G	G	-	G	G	G	T	G	G	G	G	G	G	G	-	-	G	G	G
BETA_15_vs_23	5049	2847	SNP							A	A	A	T	A	A	A	A	A	A	A	A	T	A	A	A	A	A	A	A	A	A	A	A	A	A	A	A	A	A	A	A	A	A	A	A	A	A	A	A
BETA_15_vs_23	5142	2940	SNP							A	A	A	A	A	A	A	A	A	A	A	A	A	A	A	A	A	A	A	A	A	A	A	A	A	A	A	A	A	A	A	A	A	A	A	T	A	A	A	A
BETA_15_vs_23	5237	3035	INDEL_DEL_5237_5237							-	-	-	-	-	-	-	-	-	-	-	-	-	-	-	-	-	-	-	-	-	-	-	-	-	-	-	-	-	-	-	-	-	-	A	-	-	-	-	-
BETA_15_vs_23	5245	3043	SNP							T	T	T	T	T	T	T	T	T	T	T	T	T	T	T	T	T	T	T	T	T	T	T	T	T	T	T	T	T	T	T	T	T	T	T	T	T	T	T	T
BETA_15_vs_23	5248	3046	INDEL_DEL_5248_5249							--	--	T-	--	T-	--	TT	--	--	--	--	--	--	--	--	--	--	--	--	--	--	--	--	--	--	--	--	--	--	--	--	--	--	--	--	--	--	T-	--	T-
BETA_15_vs_23	5249	3047	INDEL_DEL_5249_5249							-	-	-	-	-	-	T	-	-	-	-	-	-	-	-	-	-	-	-	-	-	-	-	-	-	-	-	-	-	-	-	-	-	-	-	-	-	-	-	-
BETA_15_vs_23	5496	3294	SNP							G	G	G	G	G	G	G	G	G	G	G	G	G	A	A	A	A	G	G	G	G	G	G	G	G	G	G	G	A	G	G	G	G	G	G	G	G	G	G	G
BETA_15_vs_23	5517	3315	SNP							G	G	G	G	G	G	G	G	G	G	G	G	G	G	G	G	G	G	G	G	G	G	G	G	G	G	G	G	G	G	G	G	G	G	G	G	G	G	G	G
BETA_15_vs_23	5573	3371	SNP							T	T	T	T	T	T	T	T	T	T	T	T	T	T	T	T	T	T	T	T	A	T	T	-	T	T	T	T	T	T	T	T	T	T	T	T	T	T	T	T
BETA_15_vs_23	5614	3412	SNP							T	T	T	T	T	T	T	T	T	T	A	T	T	T	T	T	T	T	T	-	T	T	T	T	T	-	-	T	T	T	T	T	T	T	T	T	T	T	T	T
BETA_15_vs_23	5633	3431	INDEL_DEL_5633_5634							--	--	--	--	--	--	--	--	--	--	--	--	--	--	--	--	--	--	--	--	--	--	--	--	--	--	--	--	--	--	--	--	--	--	AT	--	--	--	--	--
BETA_15_vs_23	5980	3778	INDEL_DEL_5980_5980							-	-	-	-	-	-	-	-	-	-	-	-	-	-	-	-	-	-	-	-	-	-	-	-	-	-	-	-	-	-	-	-	-	-	-	-	-	-	-	-
BETA_15_vs_23	6126	3924	SNP							T	T	T	T	T	T	T	T	T	T	T	T	T	C	C	C	C	T	T	T	T	T	T	T	T	T	T	T	C	T	T	T	T	T	T	T	T	T	T	T
BETA_15_vs_23	6166	3964	SNP							T	T	A	T	A	T	A	T	T	T	T	T	T	T	T	T	T	T	T	T	T	T	T	T	T	T	T	T	T	T	T	T	T	T	T	T	T	A	T	A
BETA_15_vs_23	6184	3982	SNP							A	A	C	A	C	A	C	A	A	A	A	A	A	C	C	C	C	A	A	A	A	A	A	A	A	A	A	A	C	A	A	A	A	A	A	A	A	C	A	C
BETA_15_vs_23	6185	3983	SNP							A	C	A	C	A	C	A	C	A	C	C	A	C	A	A	A	A	C	C	C	C	A	A	C	C	C	C	C	A	A	A	C	C	A	A	C	C	A	C	A
BETA_15_vs_23	6186	3984	SNP							A	A	C	A	C	A	C	A	T	A	A	T	A	A	A	A	A	A	A	A	A	A	T	A	A	A	A	A	A	T	A	A	A	A	T	A	A	C	A	C
BETA_15_vs_23	6352	4150	SNP							G	G	G	G	G	G	G	G	G	G	G	G	G	A	A	A	A	G	G	G	G	G	G	G	G	G	G	G	A	G	G	G	G	G	G	G	G	G	G	G
BETA_15_vs_23	6374	4172	INDEL_DEL_6374_6374							T	T	T	T	T	T	T	T	T	T	T	T	T	T	T	T	-	T	T	T	T	T	T	T	T	T	T	T	-	T	T	T	T	T	T	T	T	T	T	T
BETA_15_vs_23	6455	4253	SNP							A	A	A	A	A	A	A	A	A	A	A	A	A	A	A	A	A	A	A	A	G	G	A	A	A	A	A	A	A	A	A	A	A	A	A	A	A	A	A	A
BETA_15_vs_23	6571	4369	INDEL_DEL_6571_6571							T	T	T	T	T	T	T	T	T	T	T	T	T	T	T	T	T	T	T	T	T	T	T	T	T	-	T	T	T	T	T	T	T	T	T	T	T	T	T	T
BETA_15_vs_23	6656	4454	INDEL_DEL_6656_6656							T	T	T	T	T	T	T	T	T	T	T	T	T	T	T	T	T	T	-	T	T	T	T	T	T	T	T	T	T	T	T	T	T	T	T	T	T	T	T	T
BETA_15_vs_23	6658	4456	SNP							T	T	T	T	T	T	T	T	T	T	C	T	T	T	T	T	T	T	T	T	T	T	T	T	T	T	T	T	T	T	T	T	T	T	T	T	T	T	T	T
BETA_15_vs_23	6667	4465	SNP							T	T	T	T	T	T	T	T	T	T	T	T	T	T	T	T	T	T	T	T	T	T	T	T	T	T	T	T	T	T	T	T	T	A	T	T	T	T	T	T
BETA_15_vs_23	6668	4466	INDEL_DEL_6668_6668							T	T	T	T	T	T	T	T	T	T	T	T	T	T	T	T	T	T	T	T	T	T	T	T	T	T	T	T	T	T	T	-	T	T	T	T	T	T	T	T
BETA_15_vs_23	6681	4479	INDEL_DEL_6681_6681							T	T	-	-	T	T	T	T	T	T	-	T	-	T	T	T	T	T	-	T	T	-	T	T	T	T	T	-	T	T	T	T	-	T	T	T	-	T	-	T
BETA_15_vs_23	6826	4624	INDEL_DEL_6826_6827							AT	AT	AT	AT	AT	AT	AT	AT	AT	AT	AT	AT	AT	AT	AT	AT	AT	--	AT	AT	AT	AT	AT	AT	AT	AT	AT	AT	AT	AT	AT	AT	AT	AT	AT	AT	AT	AT	AT	AT
BETA_15_vs_23	6830	4628	SNP							G	G	G	G	G	G	G	G	G	G	G	G	G	A	A	A	A	G	G	G	G	G	G	G	G	G	G	G	A	G	G	G	G	G	G	G	G	G	G	G
[truncated: 68 more columns]
