# Supplementary material for: Natural haplotypes of FLM non-coding sequences fine-tune flowering time in ambient spring temperatures in Arabidopsis
Source: eLife journal article supplement (doi:10.7554/elife.22114), 2017-03-15
Supplement: supp [file elife-22114-supp-v1.zip › elife_poa_e22114_Supplementary_File_5.xlsx]

## Sheet: Table_S5
Supplementary file 5: Output data from association analysis (p-values). Sites selected for further analysis are marked in green.
Type	position_alignment	position	FLM_beta_15°C	FLM-delta_15°C	FLM-beta_23°C	FLM-delta_23°C	Exon1_15°C	Exon1_23°C	FLM-beta_15°C_vs_23°C	FLM-delta_15°C_vs_23°C	FLM-delta_vs_FLM-beta_15°C	FLM-delta_vs_FLM-beta_23°C
SNP	49	-2153	0.260079	3.39689	0.307798	3.63227	0.14779	0.0155315	0	2.53217	3.25615	3.48461
SNP	85	-2117	0.200423	0.827582	0.775541	0.93594	0.413071	0.374481	0.680748	0.234888	0.828125	1.05069
SNP	111	-2091	0.880809	0.413111	0.827492	0.374217	0.992457	0.908987	0.0854296	0.837571	0.560603	0.516452
SNP	119	-2083	0.260079	3.39689	0.307798	3.63227	0.14779	0.0155315	0	2.53217	3.25615	3.48461
SNP	183	-2019	0.248593	1.49571	0.0519031	1.32467	1.25309	0.343169	0.939191	1.31057	0.499991	0.54755
SNP	202	-2000	2.1919	0.293479	0.851398	1.15973	1.46818	0.78456	1.39101	0.0298287	2.15813	1.69914
SNP	216	-1986	2.1919	0.293479	0.851398	1.15973	1.46818	0.78456	1.39101	0.0298287	2.15813	1.69914
SNP	222	-1980	2.1919	0.293479	0.851398	1.15973	1.46818	0.78456	1.39101	0.0298287	2.15813	1.69914
SNP	264	-1938	1.91438	0.00520258	0.548839	0.734931	1.64955	0.508743	1.69685	0.193267	1.58348	1.22167
INDEL_DEL_374_374	374	-1828	0.915323	0.06297	0.715449	0.0410613	0.899301	0.948987	1.37369	0.296672	0.658803	0.715564
SNP	417	-1785	0.0556827	2.77015	0.0195004	2.04987	1.0186	0.492967	0.13082	2.3724	1.52934	1.52834
SNP	453	-1749	0.473914	0.936044	0.582655	0.775541	0.0112614	0.538506	0.0854296	0.636009	0.881636	0.775667
SNP	469	-1733	0.248593	1.49571	0.0519031	1.32467	1.25309	0.343169	0.939191	1.31057	0.499991	0.54755
SNP	547	-1655	0.374163	0.046788	0.232526	0.20045	0.453327	0.125996	0.0854296	0.340344	0.0346697	0.140205
SNP	628	-1574	0.473914	0.936044	0.582655	0.775541	0.0112614	0.538506	0.0854296	0.636009	0.881636	0.775667
SNP	650	-1552	0.732674	1.7473	0.378556	2.26804	0.686223	0.127279	0.424373	0.9352	2.49217	2.66384
SNP	662	-1540	0.278134	0.160353	0.391616	0.360342	0.41223	0.399169	0.0572873	0.0444581	0.464478	0.456104
SNP	667	-1535	1.43142	0.00746604	0.333754	0.383094	1.60679	0.329362	1.20103	0.120476	1.12714	0.782207
INDEL_DEL_736_736	736	-1466	1.91438	0.00520258	0.548839	0.734931	1.64955	0.508743	1.69685	0.193267	1.58348	1.22167
SNP	755	-1447	0.676029	0.140199	0.265924	0.0849774	0.775541	0.538506	0.887205	0.0597481	0.629123	0.169699
SNP	781	-1421	0.265887	0.538161	0.93594	0.413071	0.355312	0.750716	0.680748	0.837571	0.560603	0.582745
INDEL_DEL_832_832	832	-1370	0.477018	1.2168	0.761631	1.85466	0.899597	0.557066	0.312067	0.708584	1.80877	2.83019
SNP	833	-1369	0.60813	0.839489	0.629186	1.81404	1.28209	0.629665	0.100568	0.38376	1.46437	2.43832
SNP	891	-1311	0.60813	0.839489	0.629186	1.81404	1.28209	0.629665	0.100568	0.38376	1.46437	2.43832
SNP	909	-1293	0.60813	0.839489	0.629186	1.81404	1.28209	0.629665	0.100568	0.38376	1.46437	2.43832
SNP	958	-1244	0.616333	2.08951	1.57383	1.47688	0.943934	0.803221	1.32331	3.21694	2.58566	2.56516
INDEL_DEL_975_976	975	-1227	0.265887	0.538161	0.93594	0.413071	0.355312	0.750716	0.680748	0.837571	0.560603	0.582745
INDEL_DEL_1007_1008	1007	-1195	0.301476	0.0296558	1.02659	0.0976954	0.887688	0.726465	0.28844	0.564985	0.341398	0.456465
INDEL_DEL_1008_1008	1008	-1194	0.387301	0.0255503	1.00305	0.0996146	0.995032	0.754662	0.189654	0.056533	0.568183	0.811608
SNP	1150	-1052	0.248593	1.49571	0.0519031	1.32467	1.25309	0.343169	0.939191	1.31057	0.499991	0.54755
SNP	1191	-1011	0.0346464	0.374254	0.582655	0.495	0.111961	0.266103	0.541652	0.0597481	0.393739	0.516452
SNP	1223	-979	0.449737	0.191315	1.0062	0.137458	1.49798	1.32473	0.145702	0.392639	0.743072	0.781865
SNP	1228	-974	0.880809	0.413111	0.827492	0.374217	0.992457	0.908987	0.0854296	0.837571	0.560603	0.516452
SNP	1321	-881	0.415527	0	0.106007	0.125836	0.387647	0.415886	0.851674	0.337444	0.223216	0.106021
SNP	1354	-848	0.185517	3.50505	0.00852125	2.0689	1.6286	0.589763	0.0539118	3.00086	2.10196	1.28945
SNP	1364	-838	0.410866	1.78004	0.137838	1.18356	0.14948	0.427191	0.366674	1.26293	0.655782	1.07385
SNP	1404	-798	0.74024	2.24726	0.0831838	1.1074	2.04987	0.730203	0.208649	2.14987	0.945988	0.465748
SNP	1656	-546	0.0419325	0.835526	0.137458	0.266723	0.36869	0.130184	0.233689	1.20698	0.934	0.890884
SNP	1734	-468	0.449737	0.191315	1.0062	0.137458	1.49798	1.32473	0.145702	0.392639	0.743072	0.781865
SNP	1832	-370	0.248593	1.49571	0.0519031	1.32467	1.25309	0.343169	0.939191	1.31057	0.499991	0.54755
SNP	1861	-341	0.249024	0.0592195	0.0346505	0.249059	0.140187	0.0719876	0.302483	0.127115	0.216461	0.249093
INDEL_DEL_1986_1986	1986	-216	0.131658	4.45666	0.232987	2.39158	0.863533	0.233142	0.368827	4.06812	3.22225	2.39203
SNP	1994	-208	0.880809	1.05063	0.880955	1.05051	0.652215	0.854714	0.415689	0.458372	0.828125	0.62876
INDEL_DEL_2030_2030	2030	-172	0.473914	0.936044	0.582655	0.775541	0.0112614	0.538506	0.0854296	0.636009	0.881636	0.775667
SNP	2042	-160	0.136209	0.806238	0.71898	0.256545	0.200677	0.242374	1.20862	2.06042	0.520497	0.0556962
SNP	2100	-102	2.1919	0.293479	0.851398	1.15973	1.46818	0.78456	1.39101	0.0298287	2.15813	1.69914
SNP	2103	-99	2.1919	0.293479	0.851398	1.15973	1.46818	0.78456	1.39101	0.0298287	2.15813	1.69914
SNP	2109	-93	1.07641	6.62856	1.58985	4.47354	0.0157991	0.3299	0.534254	6.25234	6.46847	5.01719
SNP	2197	-5	2.29876	1.91497	2.6975	1.86012	2.10253	2.00932	0.912133	2.6046	2.69991	2.50526
SNP	2373	171	0.676029	0.827582	0.495	0.413071	0.676137	0.993265	0.23389	0.636009	0.154867	0.140205
SNP	2386	184	1.05034	0.964114	1.05051	0.992457	0.992457	1.05138	0.91473	0.127115	0.336978	0.374272
SNP	2394	192	0.167283	2.67355	0.0737763	2.84541	0.425774	0.414959	0.127326	1.6111	2.17957	2.40706
SNP	2488	286	0.185517	3.50505	0.00852125	2.0689	1.6286	0.589763	0.0539118	3.00086	2.10196	1.28945
SNP	2535	333	0.333839	0.566193	0.0161661	0.125836	1.10916	0.077491	0.106581	1.0586	0.136071	0.167439
SNP	2554	352	0.880809	0.413111	0.827492	0.374217	0.992457	0.908987	0.0854296	0.837571	0.560603	0.516452
SNP	2583	381	0.410866	1.78004	0.137838	1.18356	0.14948	0.427191	0.366674	1.26293	0.655782	1.07385
SNP	2614	412	0.0801922	1.06751	0.232381	0.848171	0.847043	0.256887	1.16407	1.0499	0.267395	0.289865
SNP	2623	421	0.553869	0.687228	0.551363	0.486295	0.33469	0.50654	0.601518	0.938559	0.685978	0.976932
SNP	2624	422	0.279782	0.987289	0.0215024	0.77075	0.816869	0.113146	0.819299	0.660534	0.649154	0.624983
SNP	2624	422	0.279782	0.987289	0.0215024	0.77075	0.816869	0.113146	0.819299	0.660534	0.649154	0.624983
SNP	2625	423	0.553869	0.687228	0.551363	0.486295	0.33469	0.50654	0.601518	0.938559	0.685978	0.976932
SNP	2628	426	0.765194	1.16631	0.553612	0.983864	0.323578	0.473768	0.66458	1.12487	1.27457	1.48647
INDEL_DEL_2639_2640	2639	437	0.0577289	1.62498	0.810635	0.60118	0.423715	0.545184	1.77946	2.31674	1.42375	0.401996
INDEL_DEL_2640_2641	2640	438	0.494638	0.625655	0.582904	0.396299	0.537504	0.560025	2.61751	0.775996	0.291915	0.279556
INDEL_DEL_2641_2641	2641	439	0.396776	0.486341	0.994879	0.663437	0.178155	1.30513	1.45201	0.194635	0.434633	0.131692
SNP	2666	464	0.532611	1.26586	0.194078	1.80192	0.705601	0.00362254	0.487221	0.658461	1.95551	2.16639
SNP	2765	563	0.532611	1.26586	0.194078	1.80192	0.705601	0.00362254	0.487221	0.658461	1.95551	2.16639
SNP	2839	637	0.532611	1.26586	0.194078	1.80192	0.705601	0.00362254	0.487221	0.658461	1.95551	2.16639
SNP	3079	877	0.360362	0.387685	0.444246	0.73518	0.519055	0.415886	0.0505343	0.169054	0.024483	0.00801089
SNP	3097	895	0.185517	3.50505	0.00852125	2.0689	1.6286	0.589763	0.0539118	3.00086	2.10196	1.28945
SNP	3145	943	0.200423	0.827582	0.775541	0.93594	0.413071	0.374481	0.680748	0.234888	0.828125	1.05069
SNP	3288	1086	0.248593	1.49571	0.0519031	1.32467	1.25309	0.343169	0.939191	1.31057	0.499991	0.54755
SNP	3332	1130	0.745957	1.90295	0.968121	1.43917	0.408428	0.439453	1.23551	2.11731	1.83243	1.72599
INDEL_DEL_3503_3503	3503	1301	0.391408	0.550225	0.0629649	0.0269714	0.931781	0.142918	0.152255	0.694758	0.672906	0.630617
INDEL_DEL_3505_3505	3505	1303	1.55207	0.175506	0.215654	0.378505	1.19167	0.249515	2.14463	0.305719	1.06722	0.742632
SNP	3589	1387	0.473914	0.936044	0.582655	0.775541	0.0112614	0.538506	0.0854296	0.636009	0.881636	0.775667
INDEL_DEL_3663_3664	3663	1461	0.532611	1.26586	0.194078	1.80192	0.705601	0.00362254	0.487221	0.658461	1.95551	2.16639
SNP	3772	1570	0.538023	0.0849844	0.355312	0.880955	0.538105	0.266103	0.887205	0.458372	0.216461	0.374272
INDEL_DEL_3901_3901	3901	1699	0.410866	1.78004	0.137838	1.18356	0.14948	0.427191	0.366674	1.26293	0.655782	1.07385
SNP	3975	1773	0.136209	0.806238	0.71898	0.256545	0.200677	0.242374	1.20862	2.06042	0.520497	0.0556962
SNP	4014	1812	0.473914	0.936044	0.582655	0.775541	0.0112614	0.538506	0.0854296	0.636009	0.881636	0.775667
SNP	4026	1824	0.532611	1.26586	0.194078	1.80192	0.705601	0.00362254	0.487221	0.658461	1.95551	2.16639
SNP	4110	1908	0.0346464	0.374254	0.582655	0.495	0.111961	0.266103	0.541652	0.0597481	0.393739	0.516452
SNP	4118	1916	0.248593	1.49571	0.0519031	1.32467	1.25309	0.343169	0.939191	1.31057	0.499991	0.54755
SNP	4263	2061	0.532611	1.26586	0.194078	1.80192	0.705601	0.00362254	0.487221	0.658461	1.95551	2.16639
SNP	4324	2122	0.391408	0.550225	0.0629649	0.0269714	0.931781	0.142918	0.152255	0.694758	0.672906	0.630617
SNP	4360	2158	0.385813	2.31165	0.536877	1.56648	0.970307	0.719686	0.601035	2.32937	1.10323	1.53748
INDEL_DEL_4550_4551	4550	2348	0.933117	0.808475	0.492606	0.284453	1.29	0.47136	0.0813623	0.959431	1.08254	1.05135
INDEL_DEL_4682_4682	4682	2480	0.295363	0.77134	0.308059	0.0502748	0.246505	0.566559	0.309932	1.62733	0.665799	0.234737
SNP	4962	2760	0.724977	0.336785	0.93594	0.336752	0.652215	0.854714	0.999623	0.837571	0.200576	0.992624
SNP	4988	2786	0.766678	2.61041	1.60705	1.672	0.321188	0.832509	0.941061	3.01515	2.29876	2.57197
SNP	5049	2847	0.391408	0.550225	0.0629649	0.0269714	0.931781	0.142918	0.152255	0.694758	0.672906	0.630617
SNP	5142	2940	0.628562	0.700504	0.676137	0.676137	0.473986	0.583093	0.302483	0.458372	0.964761	0.908408
INDEL_DEL_5237_5237	5237	3035	0.374163	0.046788	0.232526	0.20045	0.453327	0.125996	0.0854296	0.340344	0.0346697	0.140205
SNP	5245	3043	0.0112601	0.0112623	0.538105	0.582655	0.0983152	0.374481	0.541652	0.0597481	0.0719861	0.0592219
INDEL_DEL_5248_5249	5248	3046	0.377079	1.51357	0.306167	0.117133	0.623031	0.122579	0.693087	1.77878	0.601057	0.0512583
INDEL_DEL_5249_5249	5249	3047	0.249024	0.750211	0.628661	0.154773	0.265924	0.200581	0.780941	0.976017	0.700952	0.200477
SNP	5496	3294	1.91438	0.00520258	0.548839	0.734931	1.64955	0.508743	1.69685	0.193267	1.58348	1.22167
SNP	5517	3315	0.628562	0.495051	0.154773	0.538105	0.582655	0.0112677	1.05816	0.837571	0.453644	0.453395
SNP	5573	3371	1.10675	0.615144	0.186728	0.466677	1.1214	0.718002	0.274384	0.845111	0.255545	0.41547
SNP	5614	3412	0.0692293	0.869814	0.826635	0.920306	0.0402576	0.483317	0.915668	1.33107	1.05641	1.187
INDEL_DEL_5633_5634	5633	3431	0.374163	0.046788	0.232526	0.20045	0.453327	0.125996	0.0854296	0.340344	0.0346697	0.140205
INDEL_DEL_5980_5980	5980	3778	1.50409	0.282949	1.35823	0.373942	1.50435	1.22039	1.32099	0.169054	1.76574	1.55497
SNP	6126	3924	1.91438	0.00520258	0.548839	0.734931	1.64955	0.508743	1.69685	0.193267	1.58348	1.22167
SNP	6166	3964	0.0469463	1.14649	0.589921	0.0986838	0.451246	0.143723	1.44327	2.22927	0.554258	0.032377
SNP	6184	3982	1.8903	1.00337	1.84275	0.516258	1.07527	1.1038	0.36326	1.32248	3.05869	1.47118
SNP	6185	3983	0.972055	2.70943	1.70749	1.34615	1.08237	1.10761	0.162159	3.14902	3.5301	2.43728
SNP	6186	3984	0.183007	2.41087	0.0837524	0.350287	0.622512	0.0391429	1.08448	2.93704	0.737437	0.426296
SNP	6352	4150	1.91438	0.00520258	0.548839	0.734931	1.64955	0.508743	1.69685	0.193267	1.58348	1.22167
INDEL_DEL_6374_6374	6374	4172	1.21916	0.234727	0.73518	0.146303	1.40612	0.771862	1.51587	0.213736	1.0047	0.41565
SNP	6455	4253	0.429764	1.28804	0.0682347	1.35823	0.566135	0.884801	0.390081	0.743977	0.963945	1.28812
INDEL_DEL_6571_6571	6571	4369	0.0346464	0.374254	0.582655	0.495	0.111961	0.266103	0.541652	0.0597481	0.393739	0.516452
INDEL_DEL_6656_6656	6656	4454	0.494925	0.827582	0.0592147	0.880955	0.0467842	0.125996	0.23389	0.458372	0.964761	0.908408
SNP	6658	4456	0.200423	0.140199	0.336752	0.336752	0.111961	0.538506	0.415689	0.127115	0.318748	0.72521
SNP	6667	4465	0.538023	0.11197	0.0112614	0.0228106	0.20045	0.169785	0.632902	0.0597481	0.232675	0.0112627
INDEL_DEL_6668_6668	6668	4466	0.111947	0.0592195	0.154773	0.453327	0.374217	0.453655	0.0854296	0.0597481	0.112027	0.0467899
INDEL_DEL_6681_6681	6681	4479	0.457968	1.34102	0.579019	1.7591	0.244311	0.446279	0.312395	0.964629	1.55477	2.27213
INDEL_DEL_6826_6827	6826	4624	0.453259	0.964114	0.111961	0.725093	0.0983152	0.169785	0.0854296	0.837571	1.05135	0.775667
SNP	6830	4628	1.91438	0.00520258	0.548839	0.734931	1.64955	0.508743	1.69685	0.193267	1.58348	1.22167
