# Supplementary material for: Natural haplotypes of FLM non-coding sequences fine-tune flowering time in ambient spring temperatures in Arabidopsis
Source: eLife journal article supplement (doi:10.7554/elife.22114), 2017-03-15
Supplement: supp [file elife-22114-supp-v1.zip › elife_poa_e22114_Supplementary_File_6.xlsx]

## Sheet: File_S6A
Supplementary file 6A: FLM-beta expression data of 85 accessions
Accession_name	1001_identifier	FLM-beta_expression	PRO2+/INT6+_allele
Alo-0	9506	3.83877	GGAACAAT
Adm-0	9514	0.975074	GGAACAAT
Ara-4	9520	1.82717	GGAACAAT
Cap-1	9529	3.95298	GGAACAAT
Her-12	9545	2.45016	GGAACAAT
Hum-2	9549	5.29478	GGAACAAT
01-Mar	9555	1.09386	GGAACAAT
Rel-0	9574	7.68663	GGAACAAT
Svi-0	9585	0.458403	GGAACAAT
Bor-1	5837	1.38534	AAAACAAT
DraIV 1-8	5890	1.03737	AAAACAAT
Br-0	6904	1.42993	AAAACAAT
Col-0	6909	4.9332	AAAACAAT
WAR	7477	1.65994	AAAACAAT
Per-1	8354	3.67614	AAAACAAT
Hel 3	9402	3.85538	AAAACAAT
Coa-0	9507	2.02167	AAAACAAT
Ru4-16	9768	3.17319	AAAACAAT
Kus2-2	9781	1.06938	AAAACAAT
Lu3-30	9782	4.15607	AAAACAAT
KBG1-14	9788	0.442148	AAAACAAT
Ha-SP2	9801	1.33548	AAAACAAT
MNF-Pot-21	1853	1.98403	AAAACACA
UKSE06-470	5236	3.70425	AAAACACA
App1-12	5830	1.61974	AAAACACA
T570	6114	2.82754	AAAACACA
Bor-4	6903	0.574245	AAAACACA
Wei-0	6979	5.08241	AAAACACA
Db-1	7419	3.93097	AAAACACA
Kent	8238	3.02116	AAAACACA
Cab-3	9526	5.6689	AAAACACA
Sarno-1	9660	4.25433	AAAACACA
PLY-20	9924	4.31175	AAAACACA
ICE29	9985	5.68493	AAAACACA
Star-8	9998	5.79335	AAAACACA
UKSE06-118	5023	3.68762	GATACAAT
UKID63	5768	2.19653	GATACAAT
Wt-5	6982	3.14501	GATACAAT
PNA3.40	7947	3.73435	GATACAAT
Cdc-3	9531	3.24876	GATACAAT
Fun-0	9542	4.30188	GATACAAT
Pds-1	9569	1.009	GATACAAT
Tor-1	9589	4.79622	GATACAAT
Smolj-1	9718	3.31139	GATACAAT
Furni-1	9743	4.70128	GATACAAT
Pu2-8	6957	4.72447	AAAACAAA
Edi-0	7111	3.8199	AAAACAAA
Geg-14	9125	6.72408	AAAACAAA
Stp-0	9584	4.54885	AAAACAAA
Basta-1	9619	3.73059	AAAACAAA
Noveg-1	9636	4.27575	AAAACAAA
Ha-P-13	9786	6.05663	AAAACAAA
ICE130	9952	3.48768	AAAACAAA
Koch-1	na	5.05457	AAAACAAA
CYR	88	5.68504	AAAACCAC
T480	6108	4.56232	AAAACCAC
Nok-3	6945	3.67993	AAAACCAC
Ba-1	7014	7.0068	AAAACCAC
Ca-0	7062	4.52903	AAAACCAC
Mh-0	7255	4.9422	AAAACCAC
Pog-0	7306	6.77247	AAAACCAC
Lab-7	9552	3.77406	AAAACCAC
Mur-0	9562	3.9605	AAAACCAC
Pan-0	9568	3.55904	AAAACCAC
Ria-0	9577	4.16415	AAAACCAC
RUM-20	9925	4.72556	AAAACCAC
UKSE06-533	5276	3.39928	AAACCAAT
Ty-1	5784	0.803684	AAACCAAT
Tur 4	9470	1.51143	AAACCAAT
Panik-1	9607	4.62563	AAACCAAT
Castelfed-1-197	9681	3.79266	AAACCAAT
Gn2-3	9790	5.2814	AAACCAAT
MAR-4-16	9915	3.72777	AAACCAAT
TRE-1	9926	3.19033	AAACCAAT
Dja-1	766	5.17361	AAAACCAA
Zal-1	768	4.73484	AAAACCAA
Neo-6	772	3.19391	AAAACCAA
Se-0	6961	2.83646	AAAACCAA
Westkar-4	9766	7.27619	AAAACCAA
ICE106	9964	3.40703	AAAACCAA
Bak-2	9988	5.44242	AAAACCAA
ICE153	10010	3.93135	AAAACCAA
Yeg-1	10011	5.77052	AAAACCAA
Jim-1	9551	2.33053	GGAAAAAT
Olympia-2	9727	1.75533	GGAAAAAT

## Sheet: File_S6B
Supplementary file 6B: FLM-beta expression data of 27 accessions
Accession_name	1001_identifier	FTi_leaves	FLM-beta_expression
Ca-0	7062	13.4	1.94538
En-D	7120	22.8889	3.04408
Gie-0	7147	31.5	1.91047
Jm-0	7177	14.3	2.21019
Kelsterbach-4	8420	18.3	2.26397
Krot-0	7203	24.5	2.52948
Svi-0	9585	11.6667	0.257378
KBG1-14	9788	17.6	0.199564
Kus2-2	9781	17.4	0.549059
Lu3-30	9782	26.1667	2.02457
Ru4-16	9768	18.1111	1.67982
Db-1	7419	21.625	2.38327
UKSE06-470	5236	21.8	2.08395
Co-1	7077	13.5	1.40615
Wt-5	6982	18.8889	1.82267
Lan-0	7208	22.3333	1.68616
Lm-2	7217	13.2	1.05353
Rennes-1	6959	30.3333	2.75563
Seattle-0	7332	25	1.57364
Ha-P-13	9786	19.2	3.08319
Ca-0	7062	13.5	2.13641
Mh-0	7255	19.5556	2.48371
Gn2-3	9790	14.8	2.09794
TRE-1	9926	24	1.52296
Neo-6	772	13.875	1.26963
Col-0	6909	21.8	2.03575
Nd-1	na	13.4	0
