# Supplementary material for: Natural haplotypes of FLM non-coding sequences fine-tune flowering time in ambient spring temperatures in Arabidopsis
Source: eLife journal article supplement (doi:10.7554/elife.22114), 2017-03-15
Supplement: supp [file elife-22114-supp-v1.zip › elife_poa_e22114_Supplementary_File_7.xlsx]

## Sheet: File_S7A
Supplementary file 7A: List of primers used in this study for cloning.
Construct Name	pDONR201 Construct No	pFAST-R07 Construct No.	Template	5' phosphorylation	FW_SEQ	REV_SEQ
ColFLM	11	12	-	-	-	-
INT6+CAC	20	45	pUL11	yes	ATTTTTAATTTGTGAAATTTGCACACAAAAAAAATGCTTTCTACAAGA
INT6+CAA	21	46	pUL11	yes	ATTTTTAATTTGTGAAATTTGCACAAAAAAAAAATGCTTTCTACAAGA
INT6+ACA	22	47	pUL11	yes	ATTTTTAATTTGTGAAATTTGCAACAAAAAAAAATGCTTTCTACAAGA
INT6+AAA	23	73	pUL11	yes	ATTTTTAATTTGTGAAATTTGCAAAAAAAAAAAATGCTTTCTACAAGATAGATTAATT
PRO1ΔT	26	50	pUL11	yes	CGACTGGATTAAAAAGTCTTAACAACGACAAGCTTAAAA
PRO2+AAACC	27	51	pUL11	yes	CGAGTTGGAGGAAAAAAAAACCCAAGAAAAAAGAATAAAAAGCA
INT6+Δ17bp	28	52	pUL11	no	TTTTTAATTTGTGAAATTTTTTCTACAAGATAGATTAATTTCTTG	TAATCTATCTTGTAGAAAAAATTTCACAAATTAAAAATACCG
PRO2+Δ16bp	29	53	pUL11	no	AAAAAAAAAACGAGTTGGAGAAAAAAGAATAAAAAGCAAAA	TGCTTTTTATTCTTTTTTCTCCAACTCGTTTTTTTTTTTG
Δ2xpolyA-a	34	58	pUL31	no	TTATTTTCTCTATCTCGTTTAGTTGGAGAAAAAAGAATA	ATTCTTTTTTCTCCAACTAAACGAGATAGAGAAAATAATAGTA
Δ3xPolyA	35	59	pUL34	no	TTTTTAATTTGTGAAATTTTTTCTACAAGATAGATTAATTTCTTG	TAATCTATCTTGTAGAAAAAATTTCACAAATTAAAAATACCG
Δ2xPolyA-b	36	60	pUL29	no	TTTTTAATTTGTGAAATTTTTTCTACAAGATAGATTAATTTCTTG	TAATCTATCTTGTAGAAAAAATTTCACAAATTAAAAATACCG
Δ4xPolyA	37	61	pUL35	no	GCAATGTTTAGTAGCTGATGTAAGAAAGTTTCTTACAGAT	TGTAAGAAACTTTCTTACATCAGCTACTAAACATTGCAAGAA
Δ5xPolyA	38	62	pUL37	no	GGTGAAACCCTAATGAGAGCAGTTTTAAACTCTTGATCA	CAAGAGTTTAAAACTGCTCTCATTAGGGTTTCACCTG
Δ6xPolyA	39	63	pUL38	no	TTTCTCCCCTCTTCTTCTTTTTTTTCTTTTGTCTACTTGTG	CAAGTAGACAAAAGAAAAAAAAGAAGAAGAGGGGAGAAAAAT
ΔINT1373bp	40	64	pUL11	no	CCGGTGACGAGTAAGAAGATTGCTAGTTCCATCTGTTG	TGAACAACAGATGGAACTAGCAATCTTCTTACTCGTCACC
ΔINT1101bp	41	65	pUL11	no	GATGGTTTATTGTAGTGCTGGACCATACAAGATACATTAT	AGACATAATGTATCTTGTATGGTCCAGCACTACAATAAAC
ΔPRO225bp	42	66	pUL11	no	AACCCTCCAAATAAAAAGAGCAAAAAGCATTGAGCGTC	GACGCTCAATGCTTTTTGCTCTTTTTATTTGGAGGGTTTAAAA
PRO2+GGAAA	67	75	pUL11	yes	CGAGTTGGAGGGGAAAAAAAAACAAGAAAAAAGAATAAAAAGCA
PRO2+GGAAC	68	76	pUL11	yes	CGAGTTGGAGGGGAAAAAAAACCAAGAAAAAAGAATAAAAAGCA
PRO2+GATAC	69	77	pUL11	yes	CGAGTTGGAGGGAATAAAAAACCAAGAAAAAAGAATAAAAAGCA
PRO254bp	70	78	pUL11	no	TTCGCCCTTGCTTGGGATTTTAAAGAAAACCTTAAAAACCAATTTCTG	AACAGAAATTGGTTTTTAAGGTTTTCTTTAAAATCCCAAGCAAGGGC

## Sheet: File_S7B
Supplementary file 7B: List of primers used in this study for qRT, pre-mRNA quantification and 3' RACE PCRs.
Name	Purpose	FW	REV	Source
BETA-TUBULIN-4_At5g44340	qRT	TTCCGTACCCTCAAGCTCGCTAA	ATCCTCTCGATGTCAATGGTGCG	this study
ACT8	qRT	GCAGCATGAAGATTAAGGTCGTGG	TGTGGACAATGCCTGGACCTGCT
FLC	qRT	GCTACTTGAACTTGTGGATAGCAA	GGAGAGGGCAGTCTCAAGGT
FLM beta	qRT	CTATGACTCTTCCTCCGGTGAC	GATCTAAGGCTCTAAGTTCATCAGCATG	modified from Lee, 2013 and Posé, 2013
FLM delta	qRT	CTATGACTCTTCCTCCGGTGAC	GCTTGAACAGCGCTTCTATC	modified from Lee, 2013 and Posé, 2013
MAF1.2	qRT	CCTCAATGTTTTGAACTCGATC	TCGACATTTGGTTCTTCAAGCTTGC	Severing, 2012
MAF1.4	qRT	GATCGTTATGAAATACAACATGC	GTATTCTTTCCCATCTGGCTAGC	Severing, 2012
ACT8_intron2	qRT pre-mRNA	ATTAATGTCGAGAAAATGAACAAA	AAGAAAATCATTTCACTGTGATCAATA	this study
ACT8_intron3	qRT pre-mRNA	TGGACTGTCATTTCTAAGTTTTTGC	CTGATTACACACACACACACACA	this study
FLM_intron2	qRT pre-mRNA	GAGTTACAGTTATTGTGTCTACTGGAA	GCACATGAAGAAAAGGAATGG	this study
FLM_intron6	qRT pre-mRNA	AAAAGTTGAAGGACTTTGATGGA	TCATCGGTGAGACATACCTTTC	this study
FLM_GSP1_v2	3' RACE	AGGGCATAACCCTTATCGGAGATTT	-	this study
FLM_GSP2	3' RACE	CGAGATCAAGCGAATCGAGAA	-	this study
FLM_Exon1	qRT_E1I1p quantification	GCGAATCGAGAACAAAAGCA	GATGAGACCATTGCGTCGTT	this study
FLM_I1_Fw1 + FLM_I1_Rev4	qRT_E1I1p quantification	GGGTCTCACTCGATTTTTGTGC	AAGCCCTAGATTTGAAGCTTCT	this study
FLM_I1_Fw1 + FLM_I1_Rev6	qRT_E1I1p quantification	GGGTCTCACTCGATTTTTGTGC	GGTTAAAGCTTACGCATCTGC	this study
