# Supplementary figures and images for: Natural haplotypes of FLM non-coding sequences fine-tune flowering time in ambient spring temperatures in Arabidopsis
Source: eLife journal article supplement (doi:10.7554/elife.22114), 2017-03-15

Figure 4-figure supplement 1 Lutz et al.

A

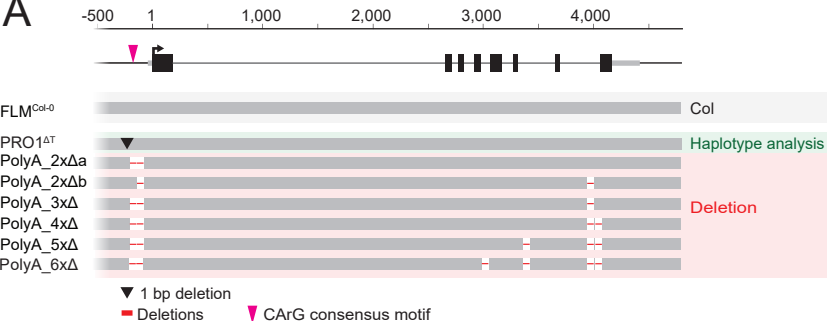

B

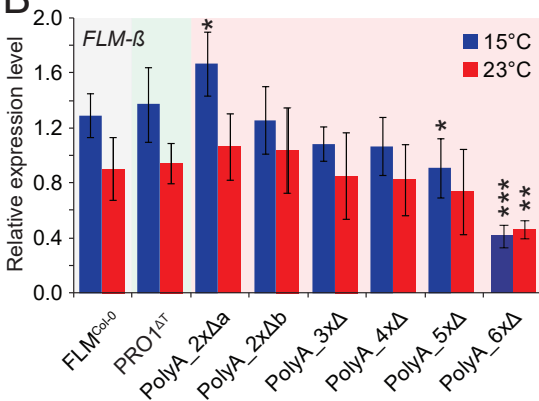

C

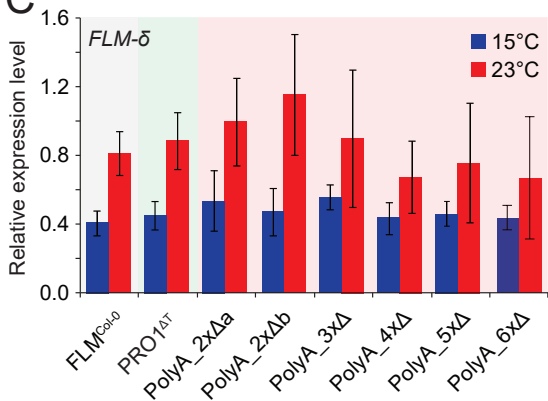

Supplement: supp [file elife-22114-supp-v1.zip]

# Figure 3-figure supplement 3 Lutz et al.

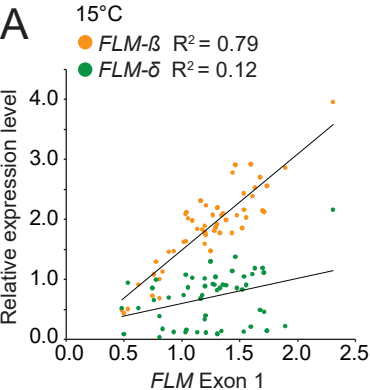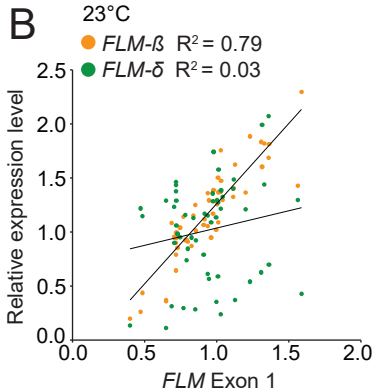

Supplement: supp [file elife-22114-supp-v1.zip]

Figure 3-figure supplement 5 Lutz et al.

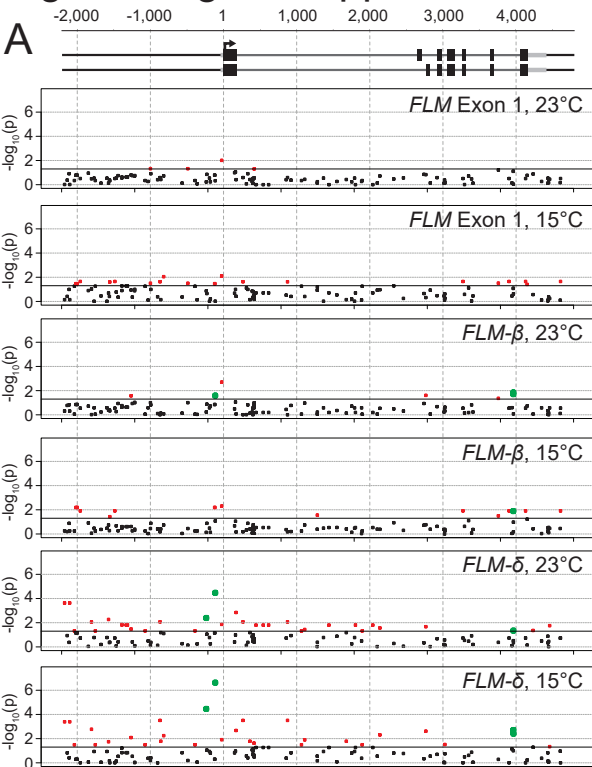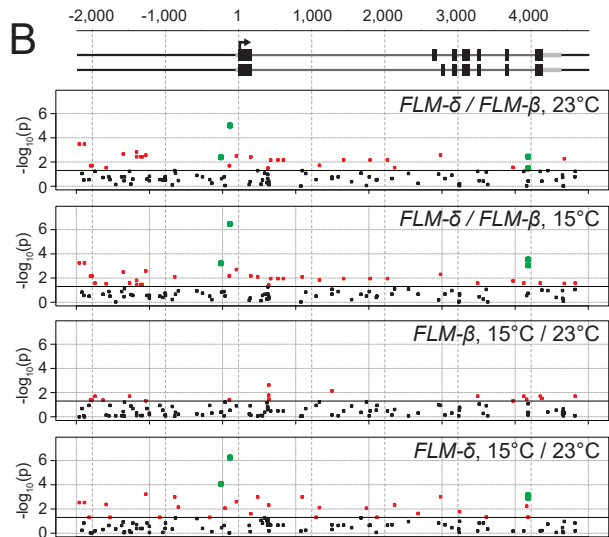

Supplement: supp [file elife-22114-supp-v1.zip]

Figure 3-figure supplement 1 Lutz et al.

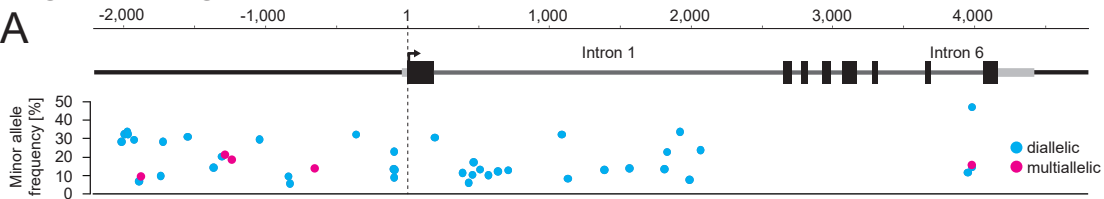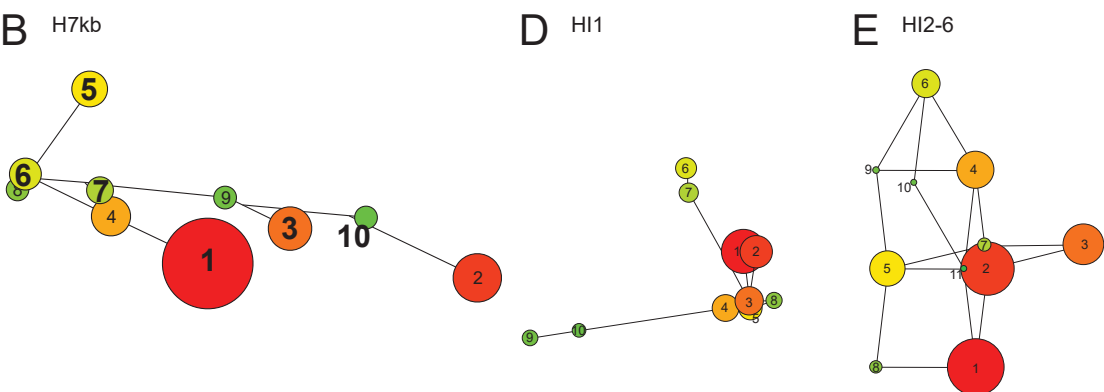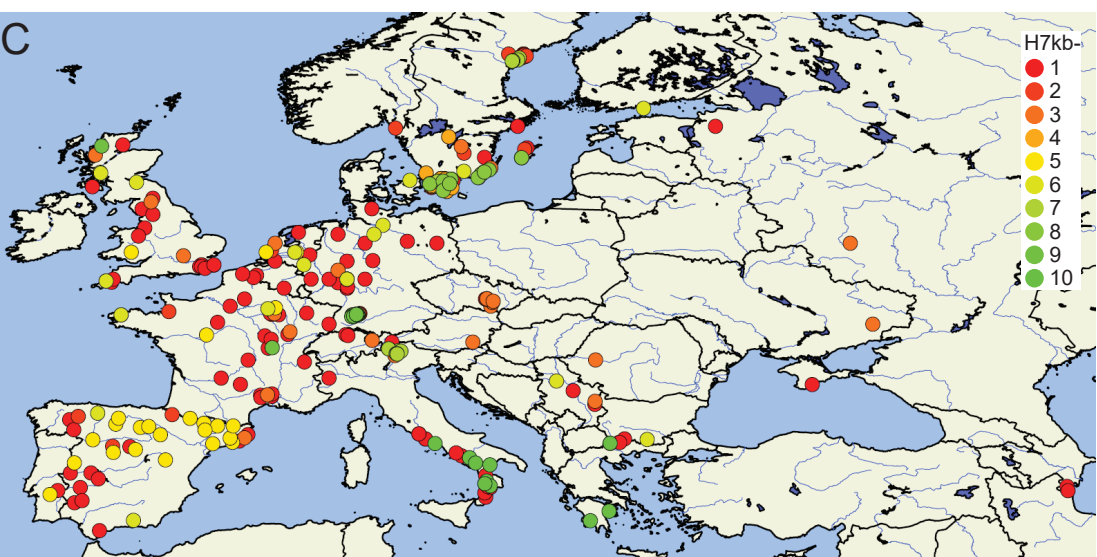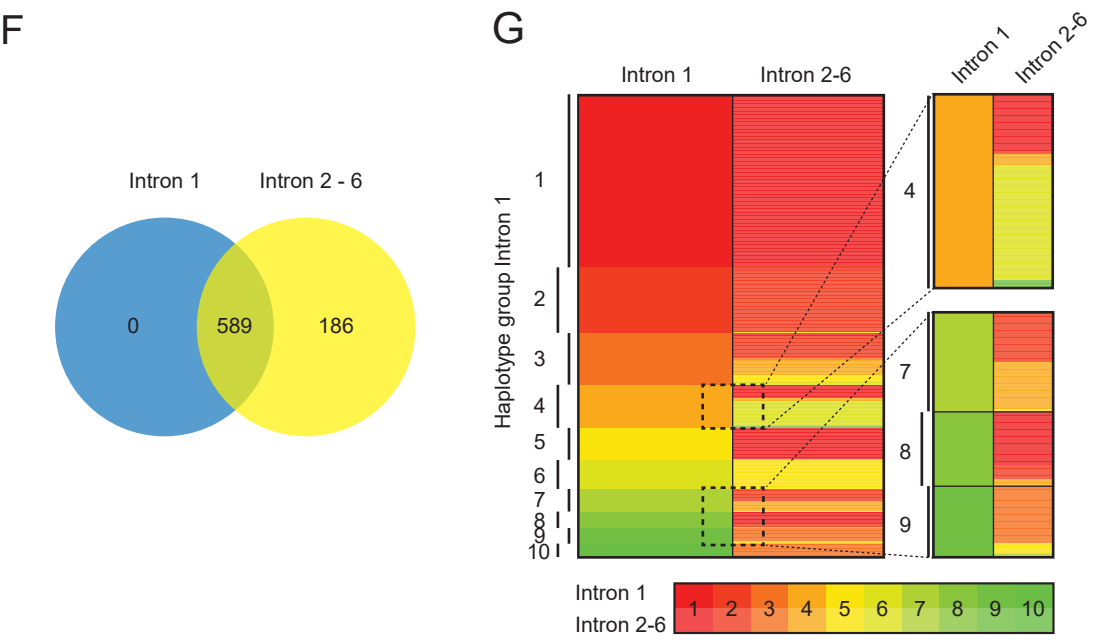

Supplement: supp [file elife-22114-supp-v1.zip]

Figure 8-figure supplement 1 Lutz et al.

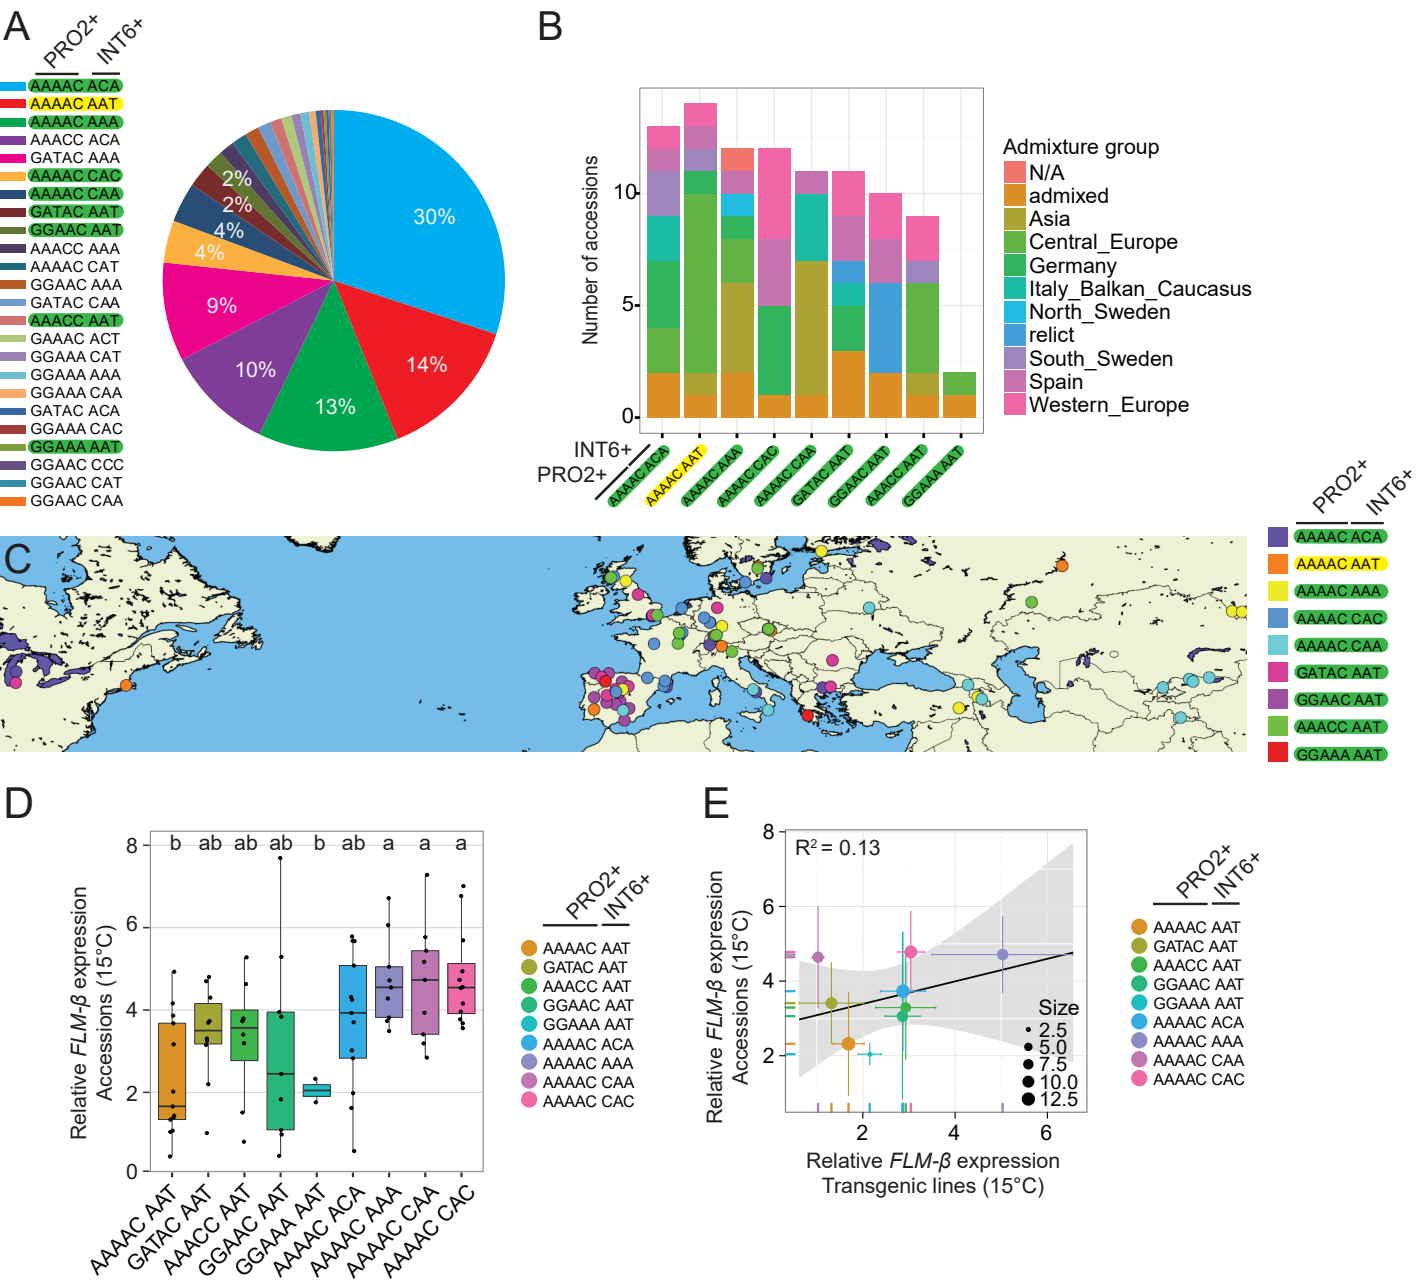

Supplement: supp [file elife-22114-supp-v1.zip]

Figure 3-figure supplement 7 Lutz et al.

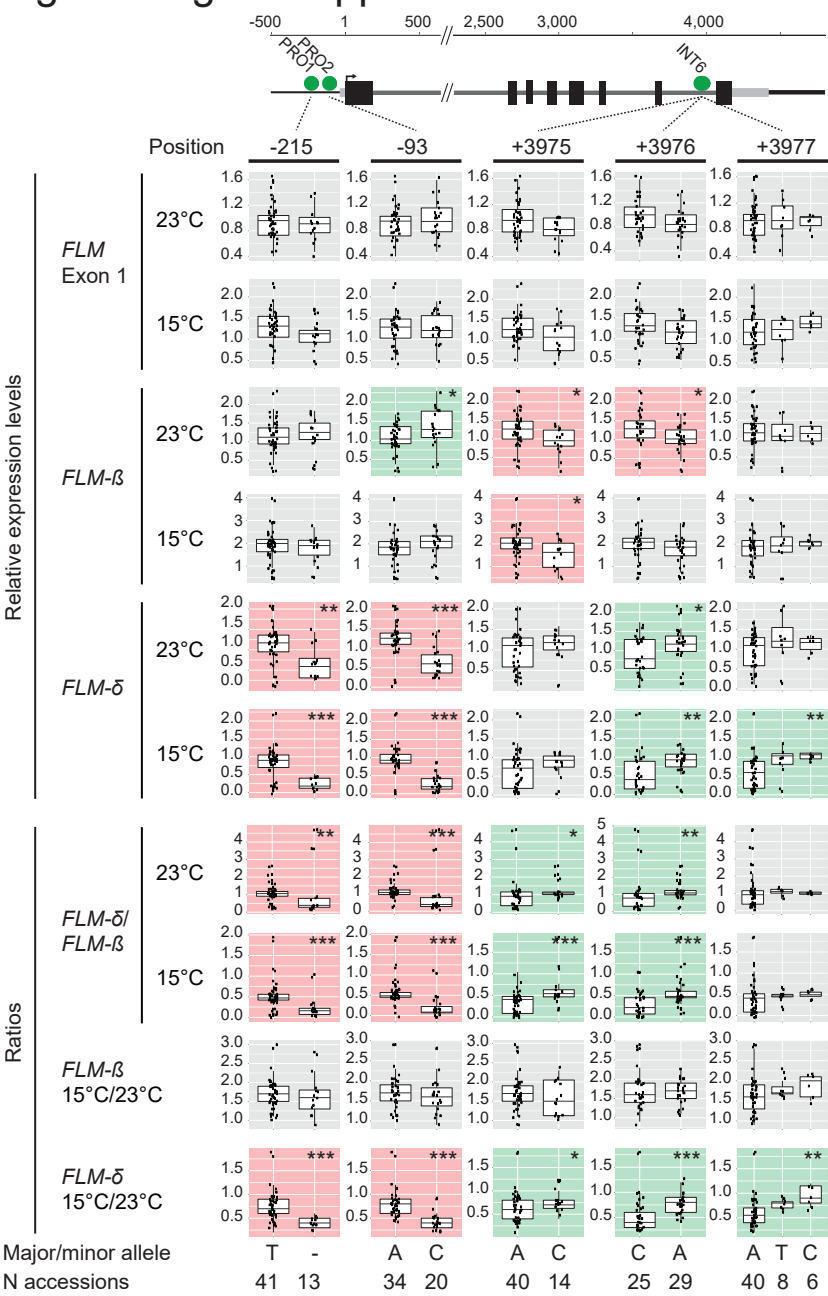

Supplement: supp [file elife-22114-supp-v1.zip]

Figure 7-figure supplement 1 Lutz et al.

A

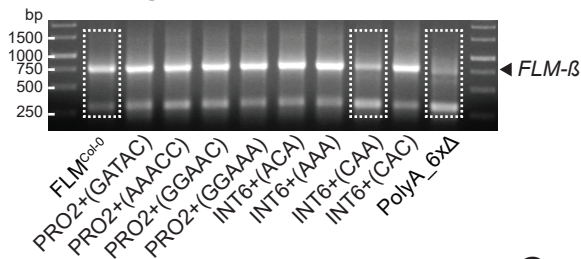

B

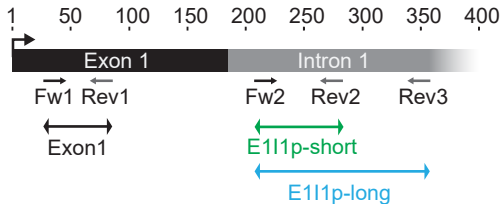

C

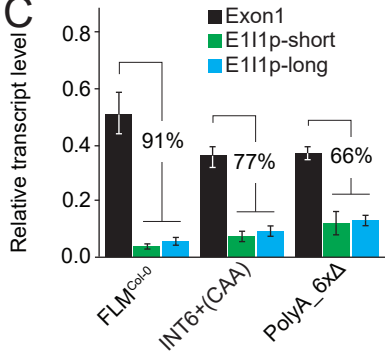

Supplement: supp [file elife-22114-supp-v1.zip]

# Figure 8-figure supplement 2 Lutz et al.

A

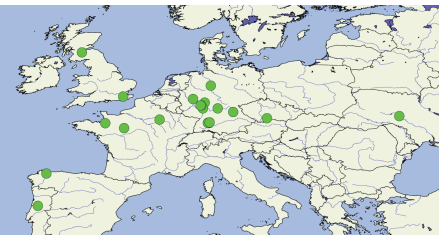

B

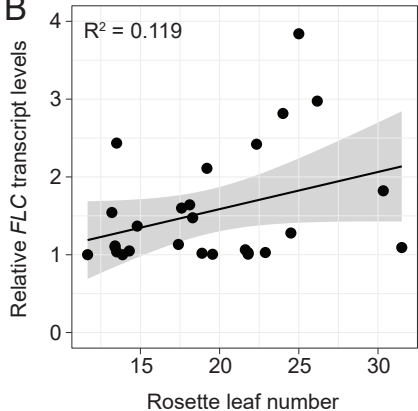

Supplement: supp [file elife-22114-supp-v1.zip]

Figure 3-figure supplement 2 Lutz et al.

**A**

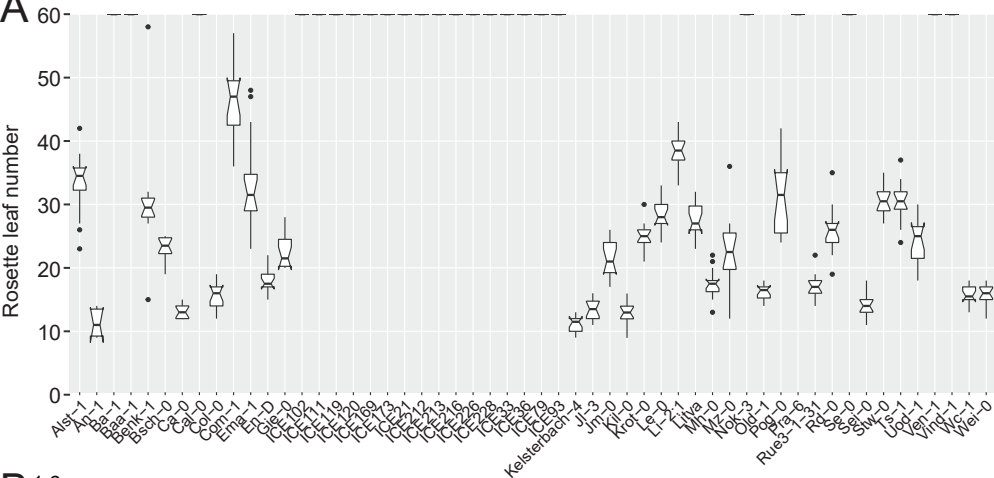

**B**

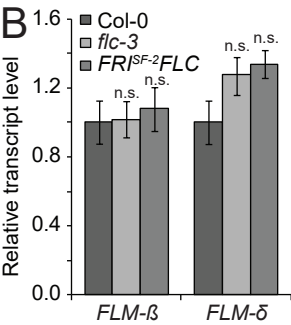

Supplement: supp [file elife-22114-supp-v1.zip]

Figure 2-figure supplement 2 Lutz et al.

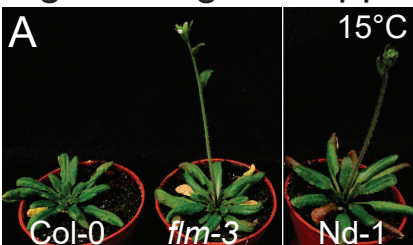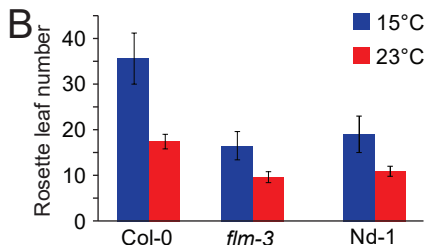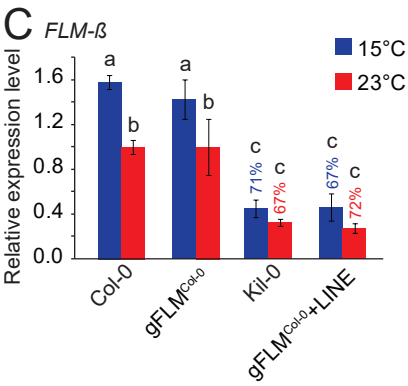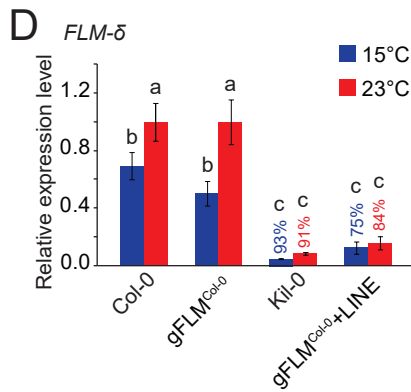

Supplement: supp [file elife-22114-supp-v1.zip]

# Figure 2-figure supplement 1 Lutz et al.

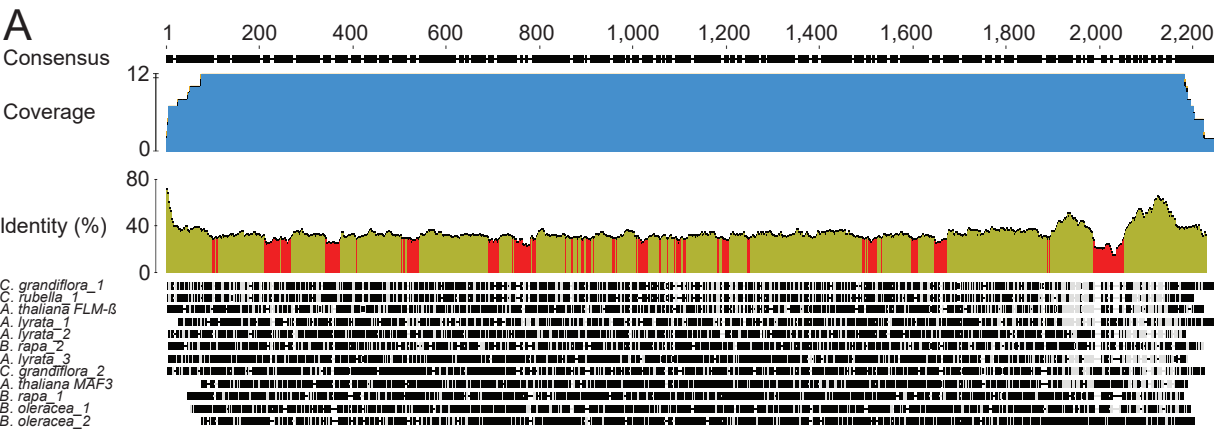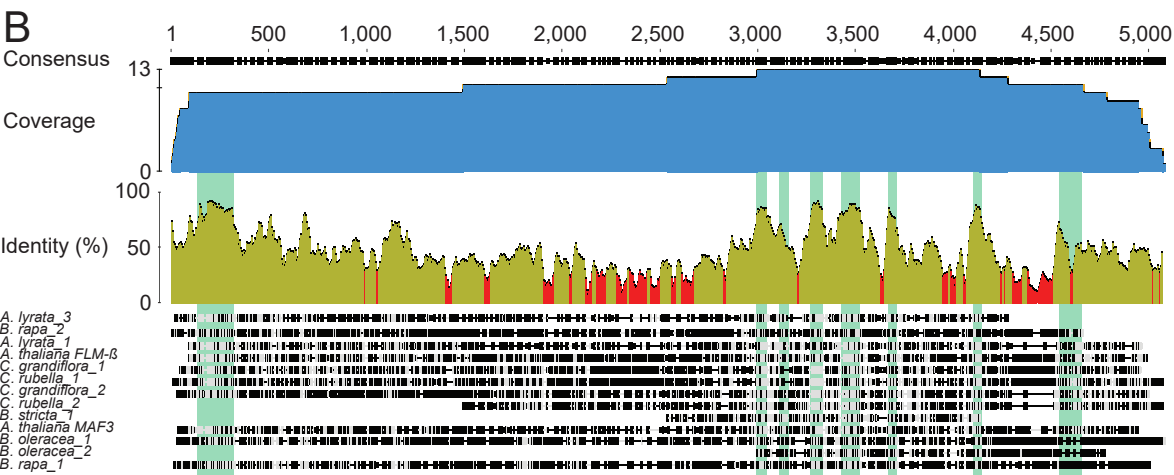

Supplement: supp [file elife-22114-supp-v1.zip › elife_poa_e22114_Figure_2_Figure_Supplement_1.pdf]

Figure 3-figure supplement 6 Lutz et al.

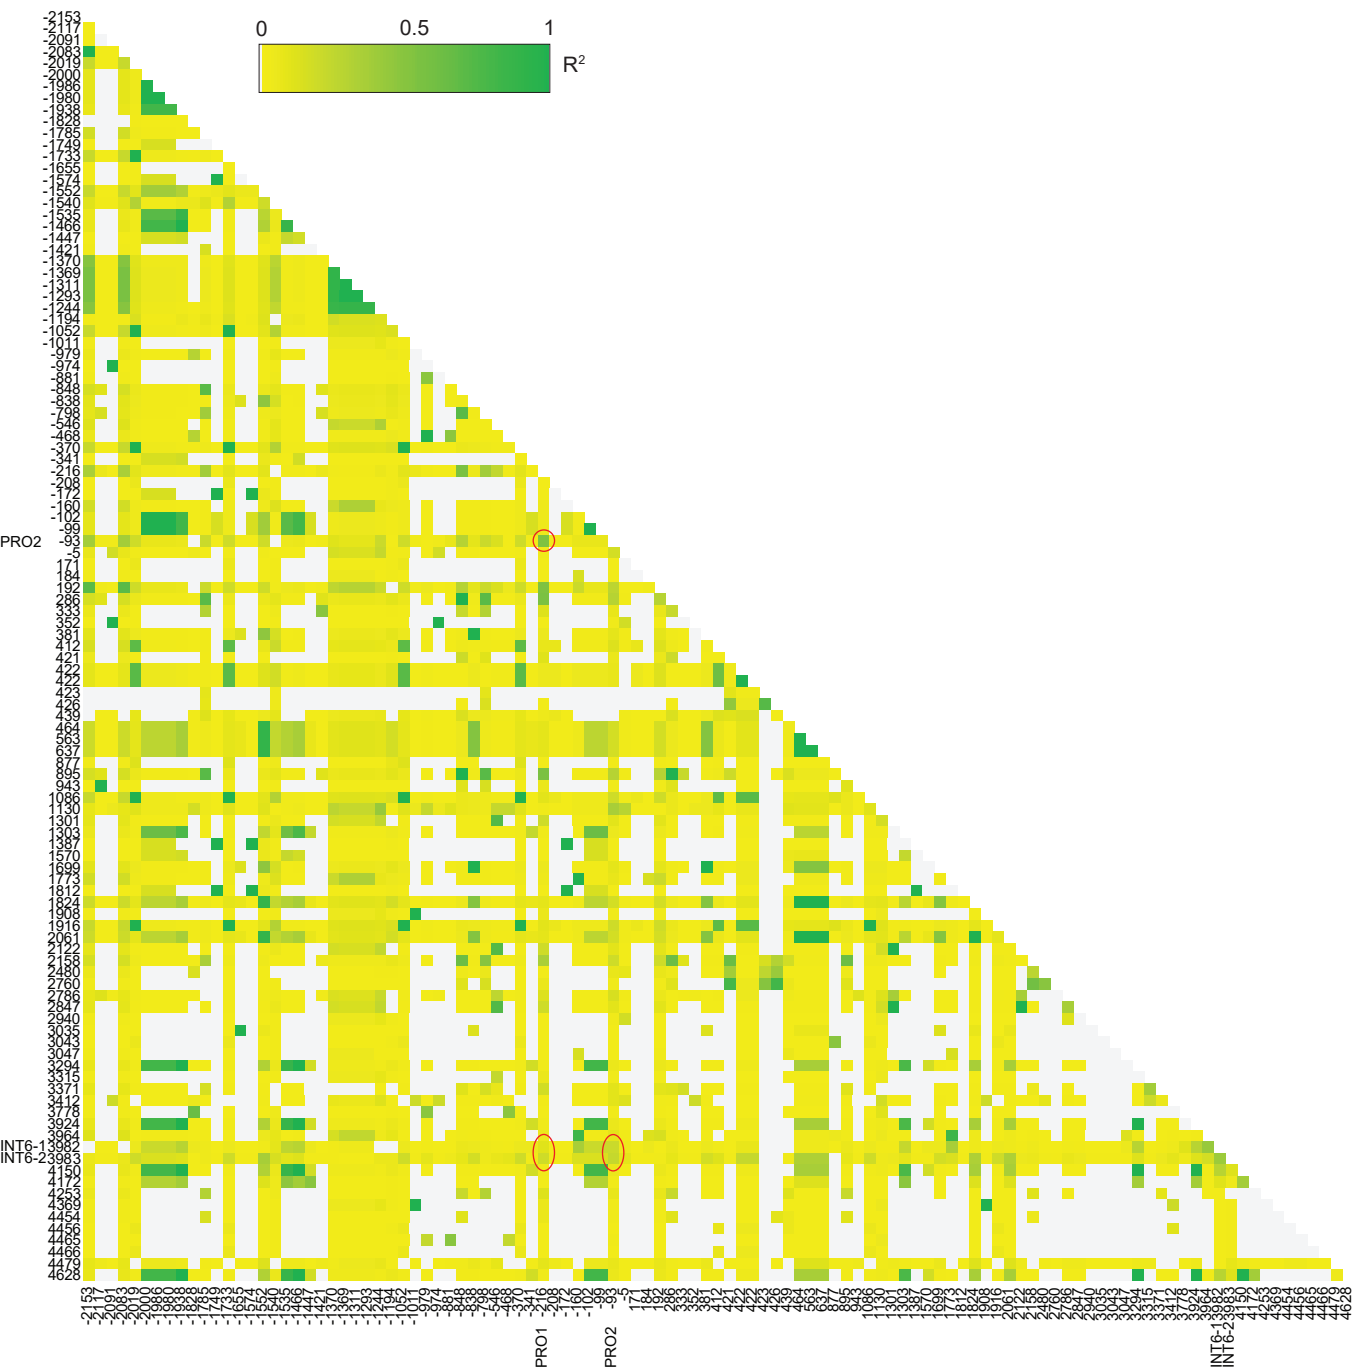

Supplement: supp [file elife-22114-supp-v1.zip › elife_poa_e22114_Figure_3_Figure_Supplement_6.pdf]

# Figure 3-figure supplement 4 Lutz et al.

**A**

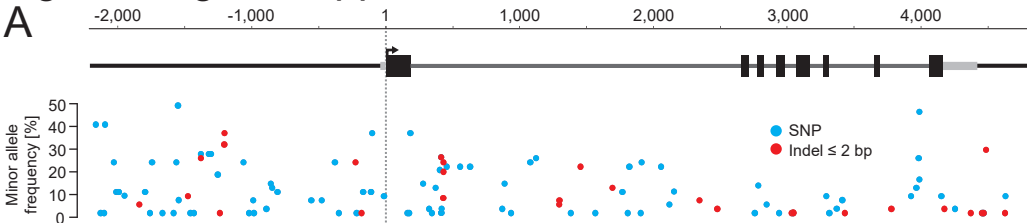

**B**

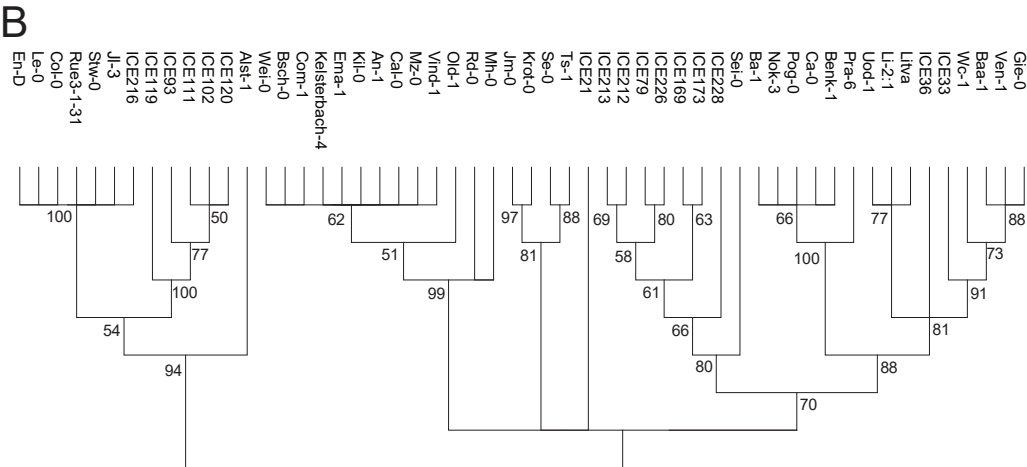

Supplement: supp [file elife-22114-supp-v1.zip › elife_poa_e22114_Figure_3_Figure_Supplement_4.pdf]

Figure 5-figure supplement 1 Lutz et al.

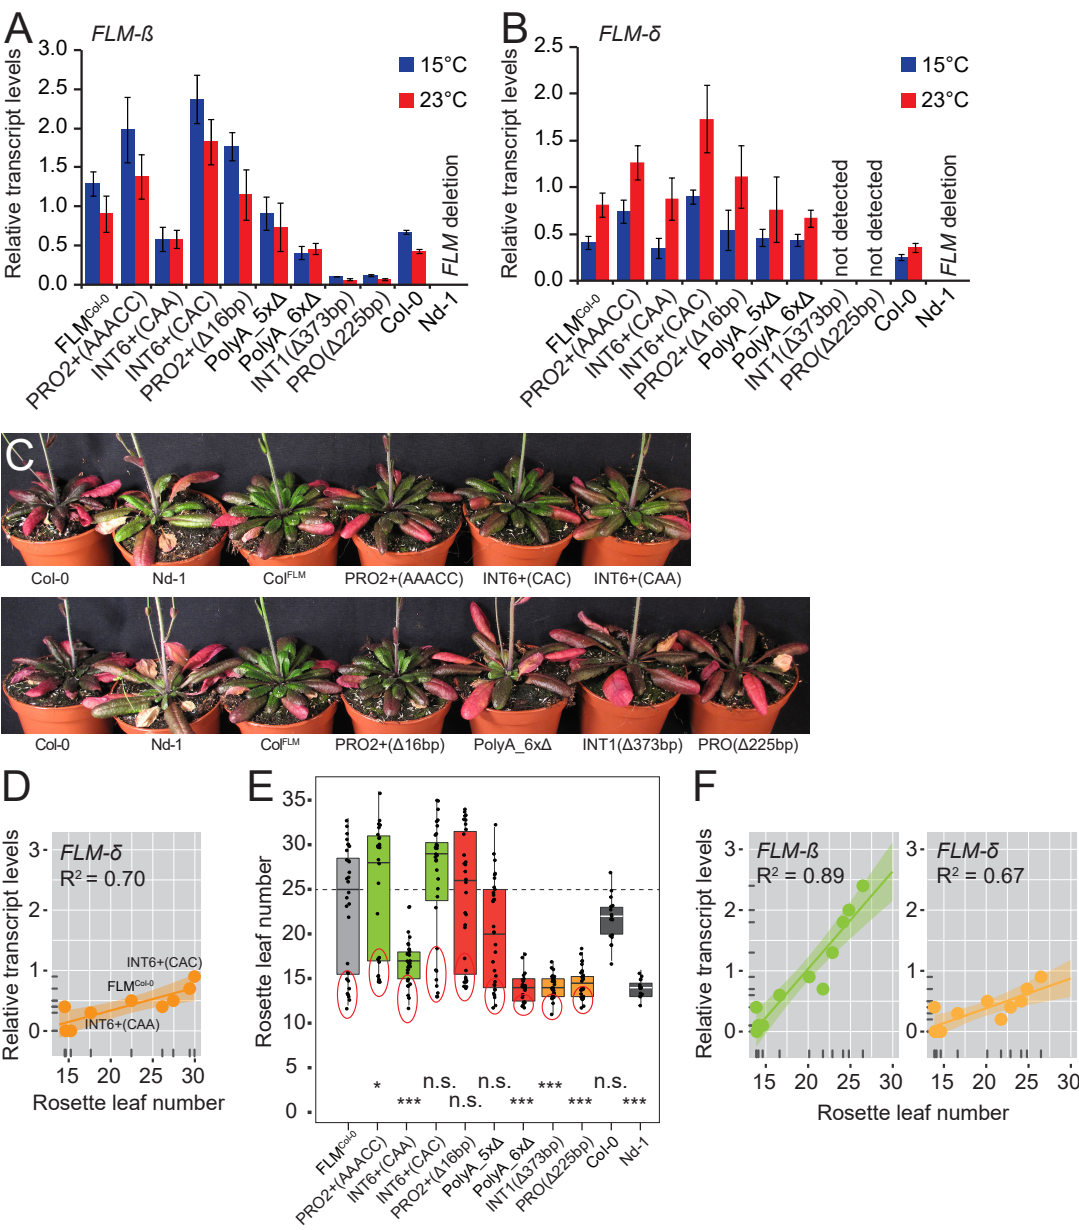

Supplement: supp [file elife-22114-supp-v1.zip › elife_poa_e22114_Figure_5_Figure_Supplement_1.pdf]
